# Supplementary material for: Utilizing an Amino Acid Scaffold to Construct Heteroditopic Receptors Capable of Interacting with Salts under Interfacial Conditions
Source: MDPI journal article supplement (doi:10.3390/ijms221910754), 2021-10-05

# **Utilizing an amino acid scaffold to construct heteroditopic receptors capable of interacting with salts under interfacial conditions**

by

Damian Jaglenieć, Natalia Walczak, Łukasz Dobrzycki, Jan Romański

Faculty of Chemistry, University of Warsaw, Pasteura 1, PL 02-093 Warsaw, Poland

\*jarom@chem.uw.edu.pl

## **TABLE OF CONTENTS**

|                                                         |    |
|---------------------------------------------------------|----|
| 1. UV-vis measurements ( JOB Plots, Binding isotherms)  | 1  |
| 2. NMR measurements (Binding isotherms, 2D NMR spectra) | 25 |
| 3. Extraction experiments                               | 40 |
| 4. NMR spectra                                          | 46 |

## **UV-vis titration experiments**

The UV-Vis titration was performed using Thermo Spectronic Unicam UV500 Spectrophotometer at 298K in acetonitrile. In each case, a 2500  $\mu\text{L}$  of freshly prepared  $3.05 \times 10^{-5}$  M solution of receptor was added to a cuvette and small aliquots of TBAX, containing constant concentration of the receptor, were added and a spectrum was acquired after each addition. In the case of ion pair titration receptor was firstly pretreated with one equivalent of  $\text{KPF}_6$  or  $\text{NaClO}_4$  (refers to receptor). The resulting titration data were analyzed using BindFit (v0.5) package, available online at <http://supramolecular.org>. Each titration was carried out in duplicate. Reported values are calculated as weighted arithmetic mean, where the weights were the errors obtained for each value separately. The given uncertainty of the association constants is the largest of the variance (external or internal)

**Fig. S1.** Dilution curve of receptor **1** in CH<sub>3</sub>CN.

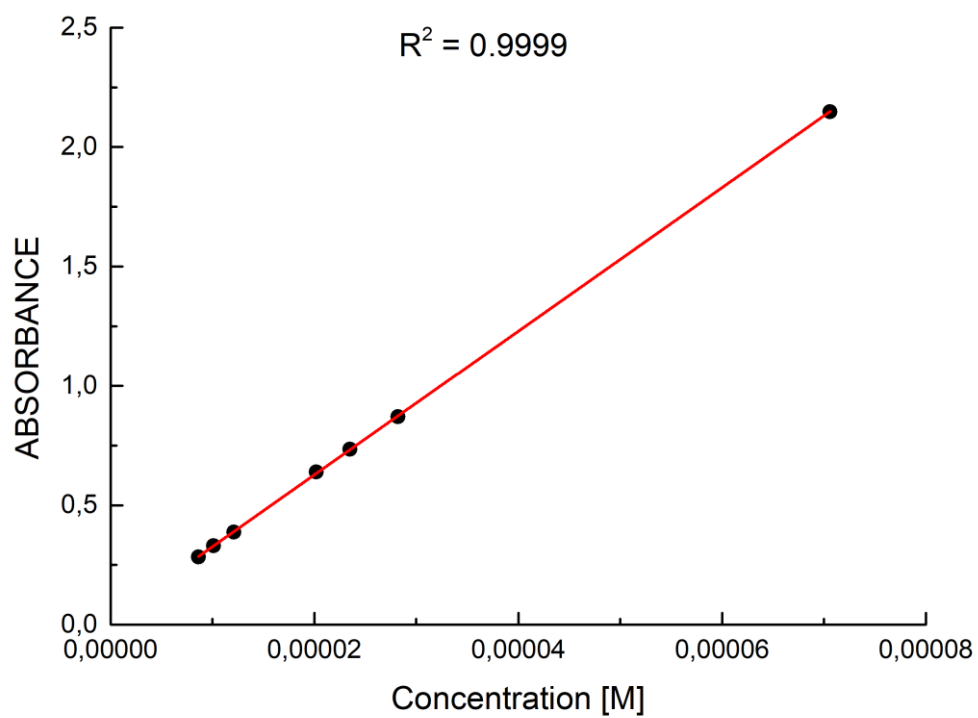

**Fig. S2.** Dilution curve of receptor **2** in CH<sub>3</sub>CN.

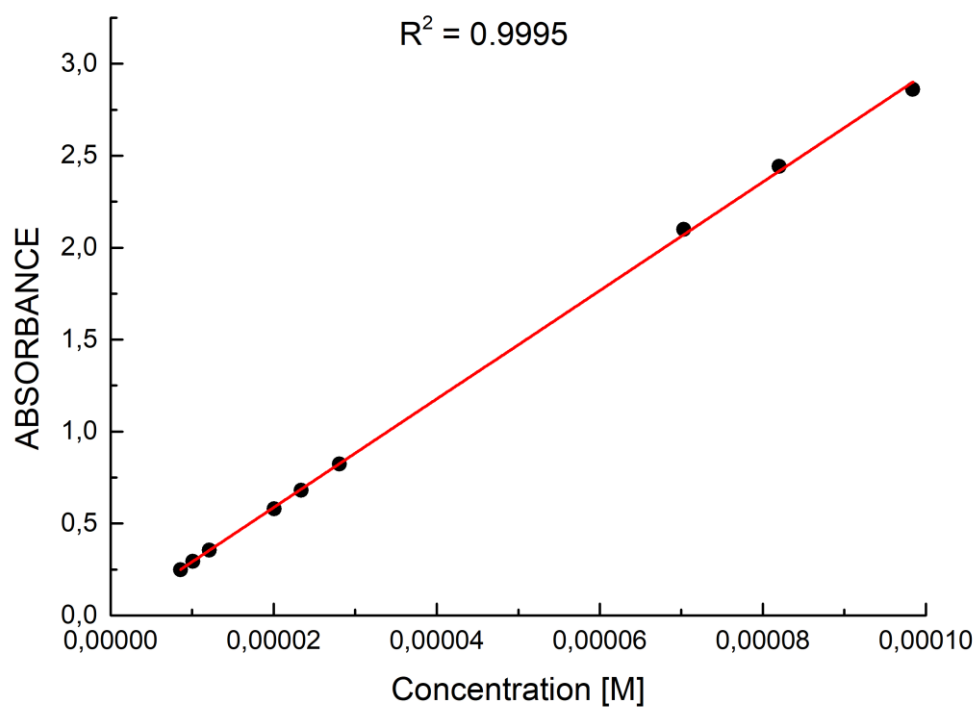

**Fig. S3.** Dilution curve of receptor **3** in CH<sub>3</sub>CN.

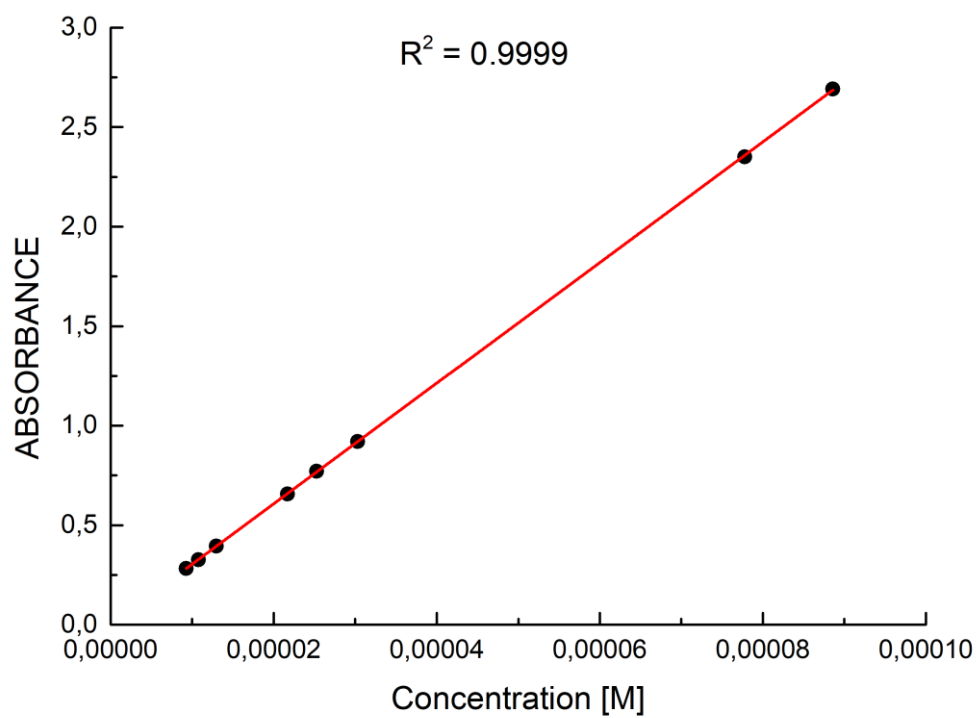

**Fig. S4.** Job plot analysis for **1** + TBACl in CH<sub>3</sub>CN.

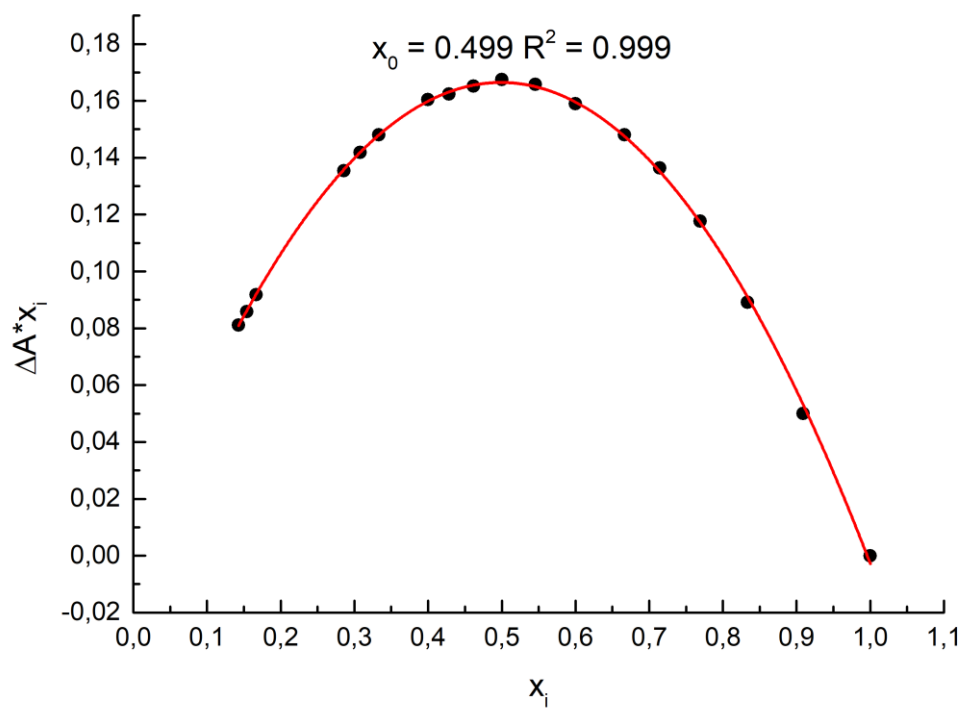

**Fig. S5.** Job plot analysis for **1** + TBABr in CH<sub>3</sub>CN.

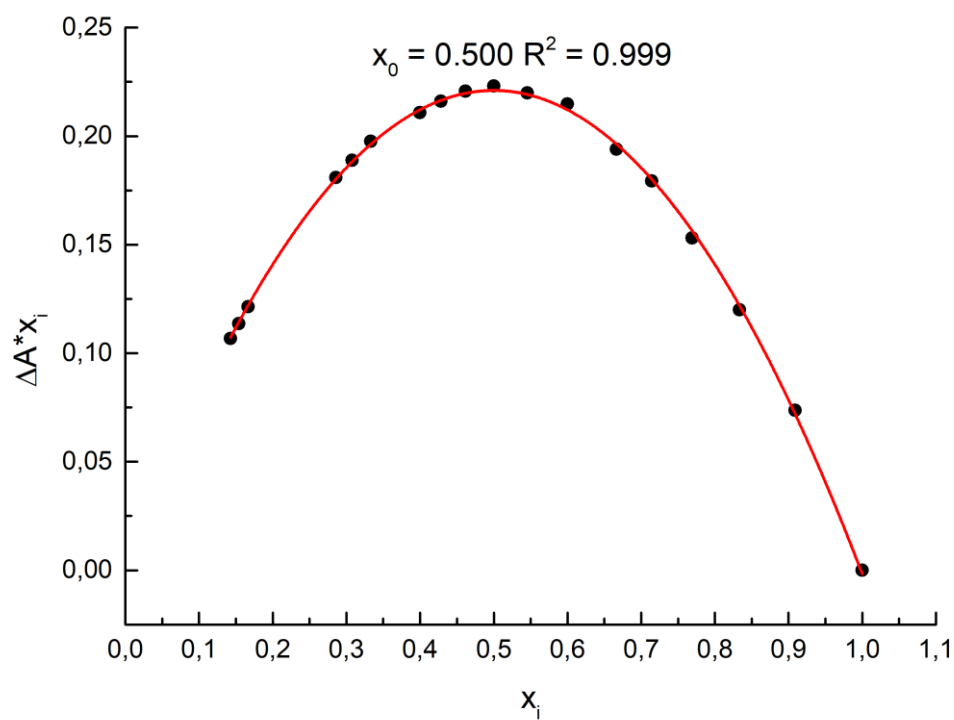

**Fig. S6.** Job plot analysis for **1** + NaClO<sub>4</sub> in CH<sub>3</sub>CN.

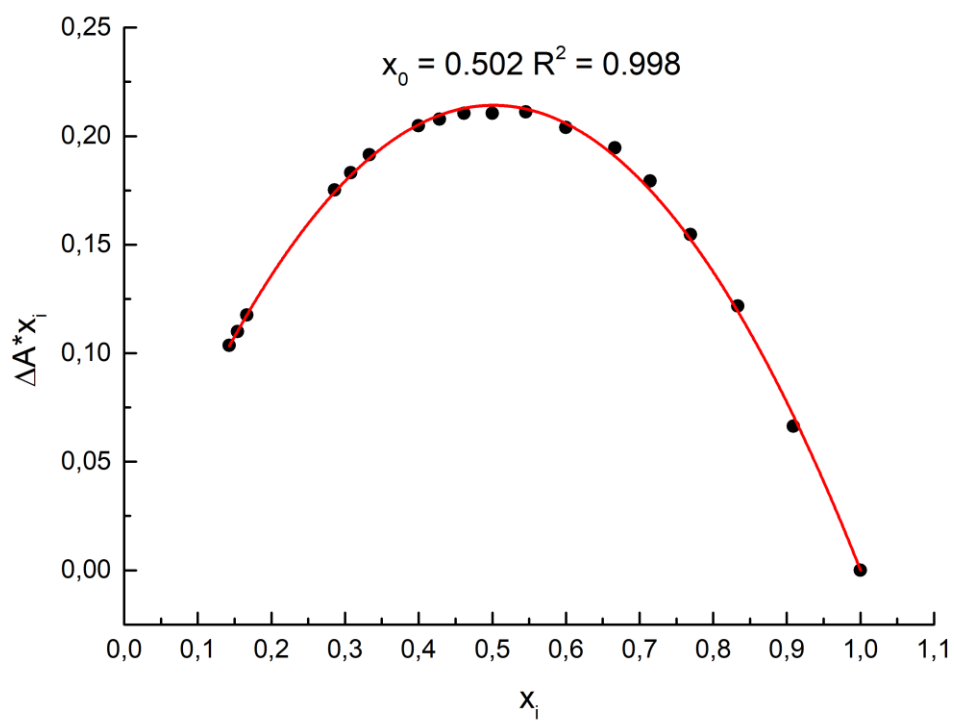

**Fig. S7.** Job plot analysis for **1** + KPF<sub>6</sub> in CH<sub>3</sub>CN.

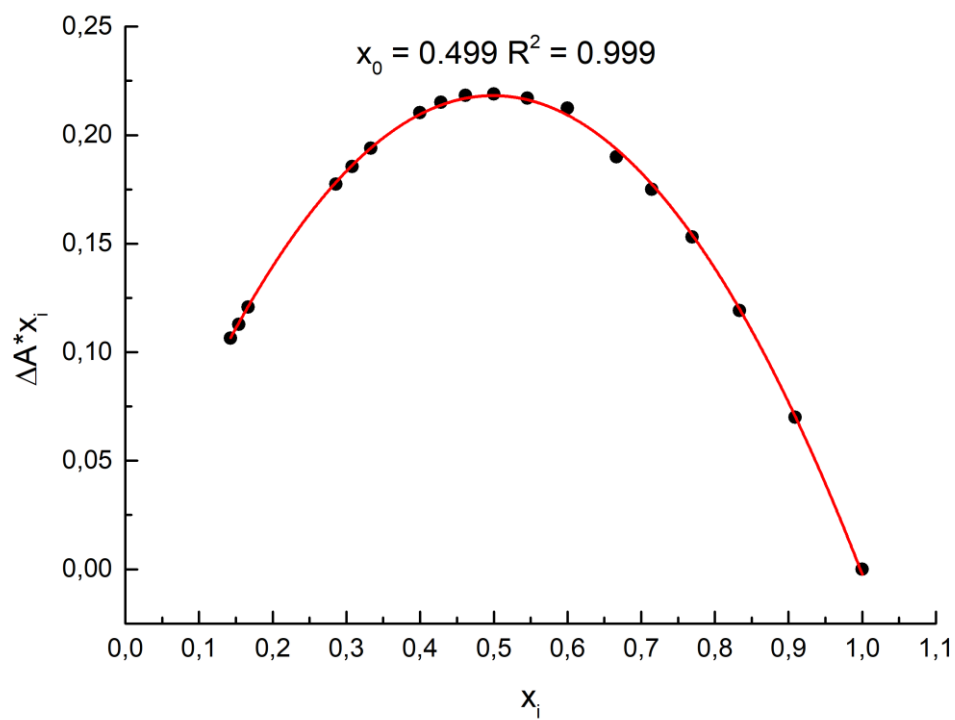

**Fig. S8.** Job plot analysis for **2** + TBACl in CH<sub>3</sub>CN.

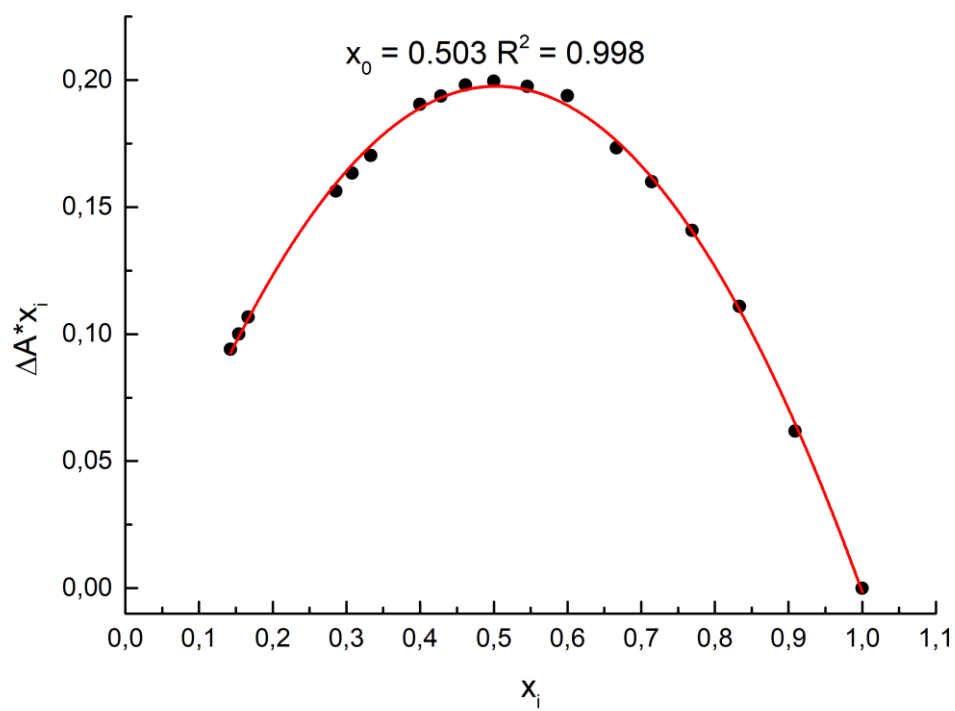

**Fig. S9.** Job plot analysis for **2** + TBABr in CH<sub>3</sub>CN.

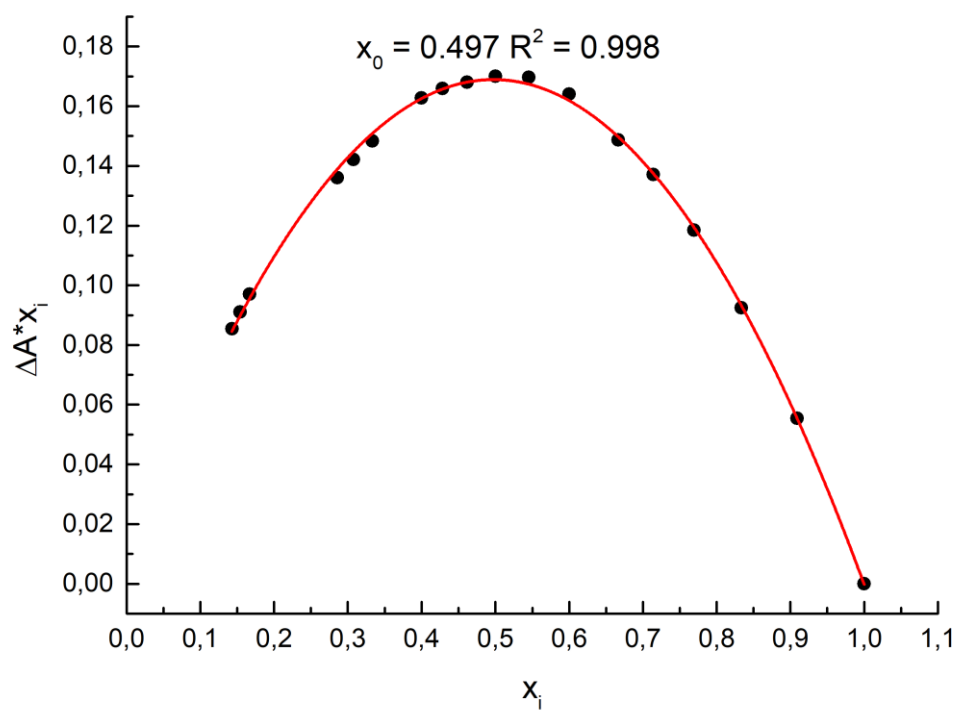

**Fig. S10.** Job plot analysis for **2** + NaClO<sub>4</sub> in CH<sub>3</sub>CN.

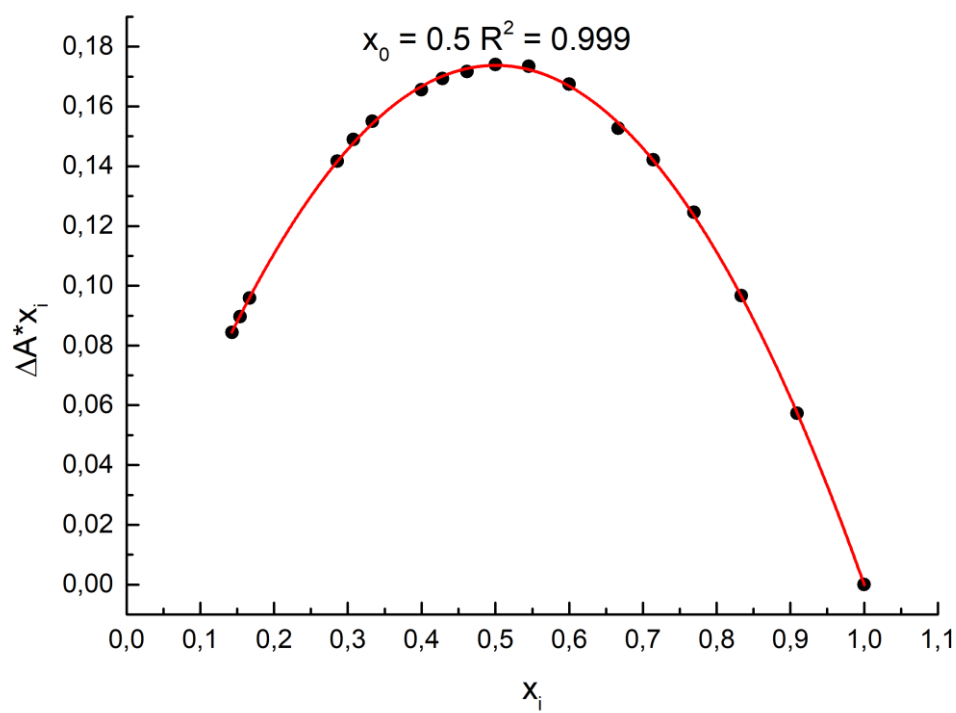

**Fig. S11.** Job plot analysis for **2** + KPF<sub>6</sub> in CH<sub>3</sub>CN.

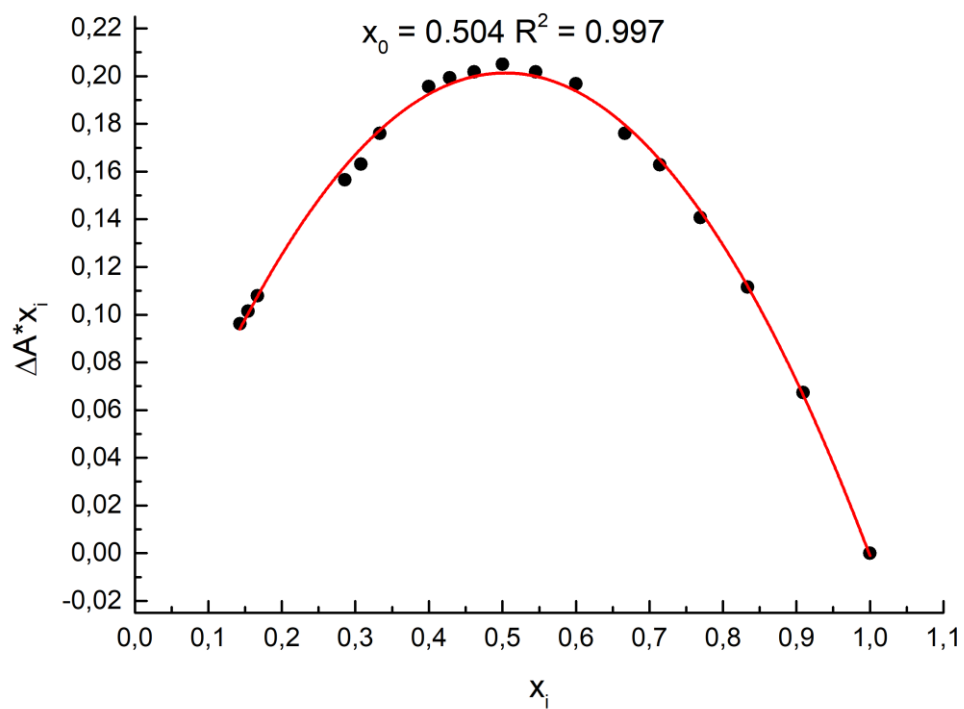

**Fig. S12.** Job plot analysis for **3** + TBACl in CH<sub>3</sub>CN.

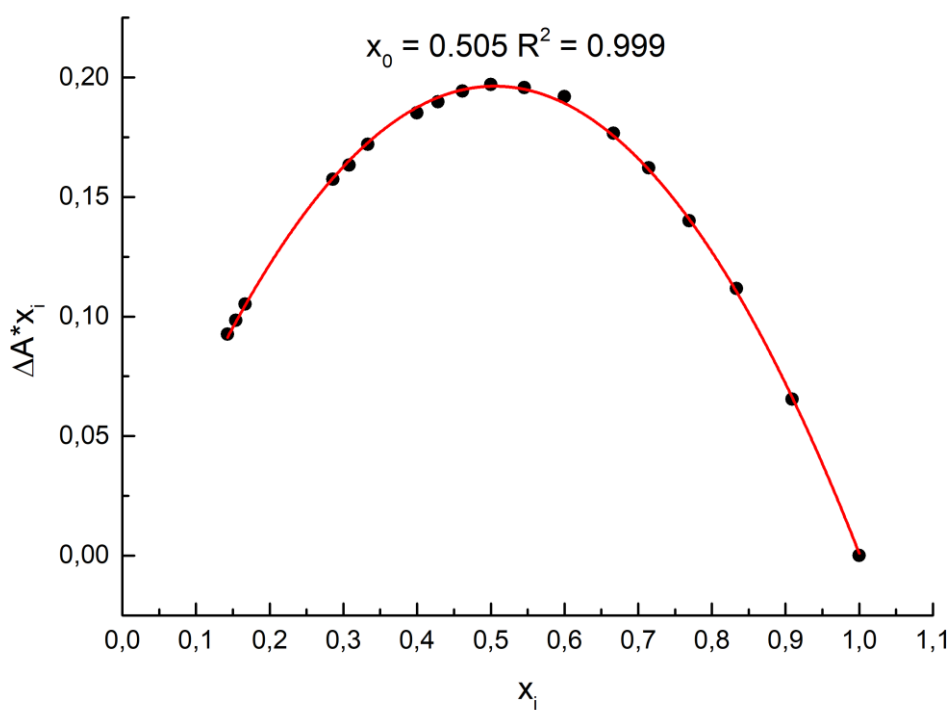

**Fig. S13.** Job plot analysis for **3** + TBABr in CH<sub>3</sub>CN.

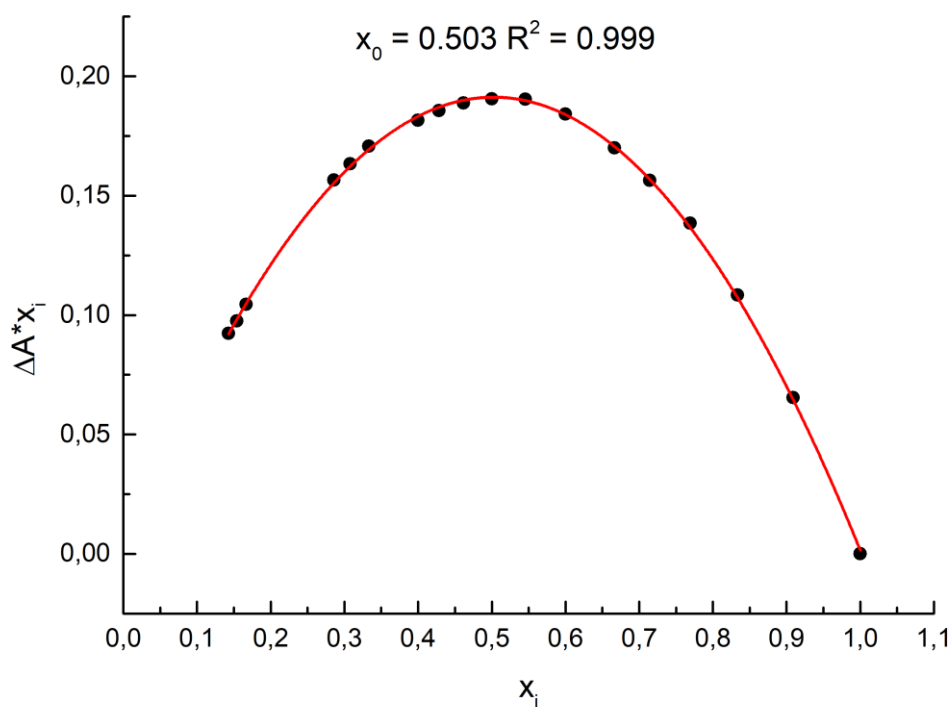

**Fig. S14.** UV-Vis titration of receptor **1** with TBACl and selected binding isotherms in CH<sub>3</sub>CN.

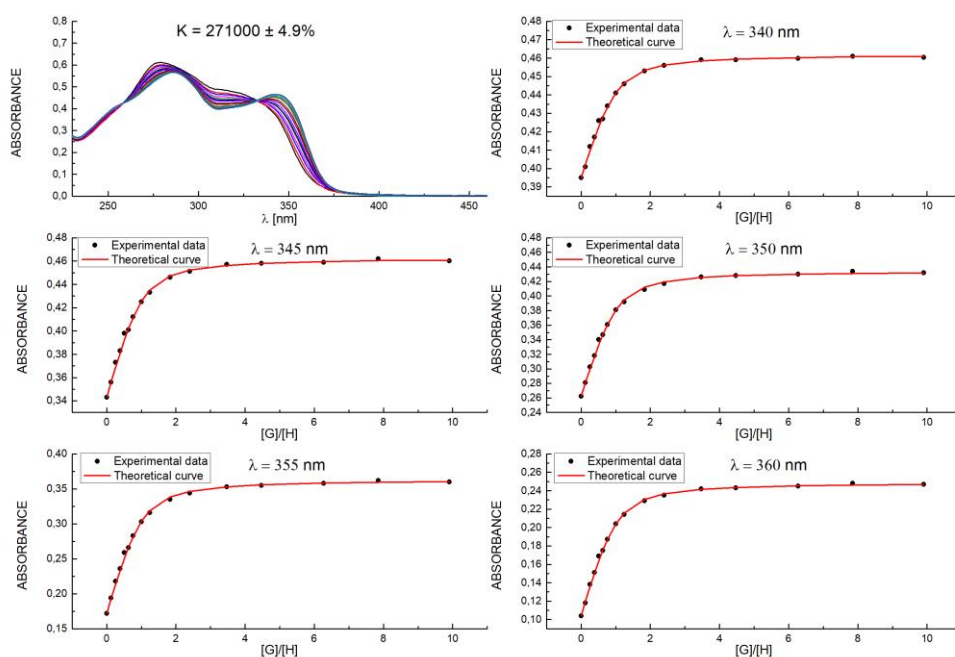



**Fig. S15.** UV-Vis titration of receptor **1** with TBACl in the presence of 1 equivalent of NaClO<sub>4</sub> and selected binding isotherms in CH<sub>3</sub>CN.

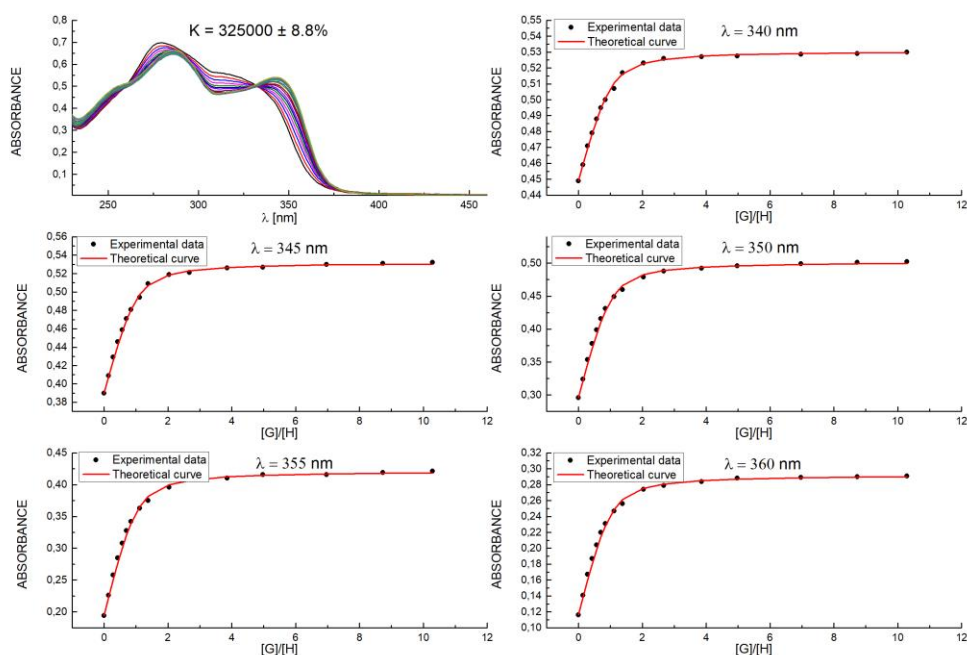

**Fig. S16a.** UV-Vis titration of receptor **2** with TBACl and selected binding isotherms in CH<sub>3</sub>CN.

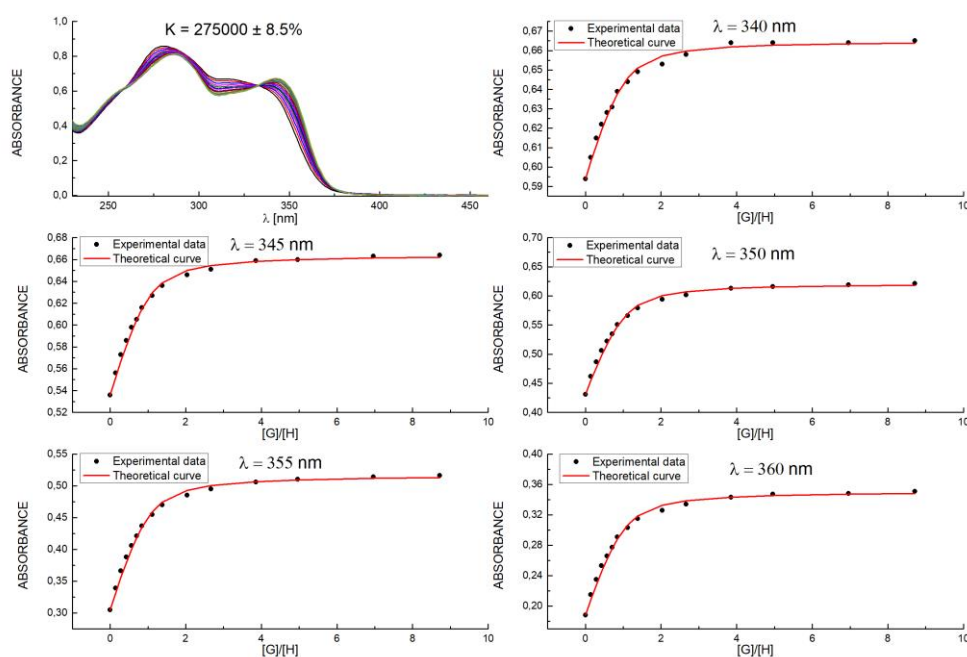

**Fig. S16b.** UV-Vis titration of receptor **2** with TBACl in the presence of 1 equivalent of NaClO<sub>4</sub> and selected binding isotherms in CH<sub>3</sub>CN.

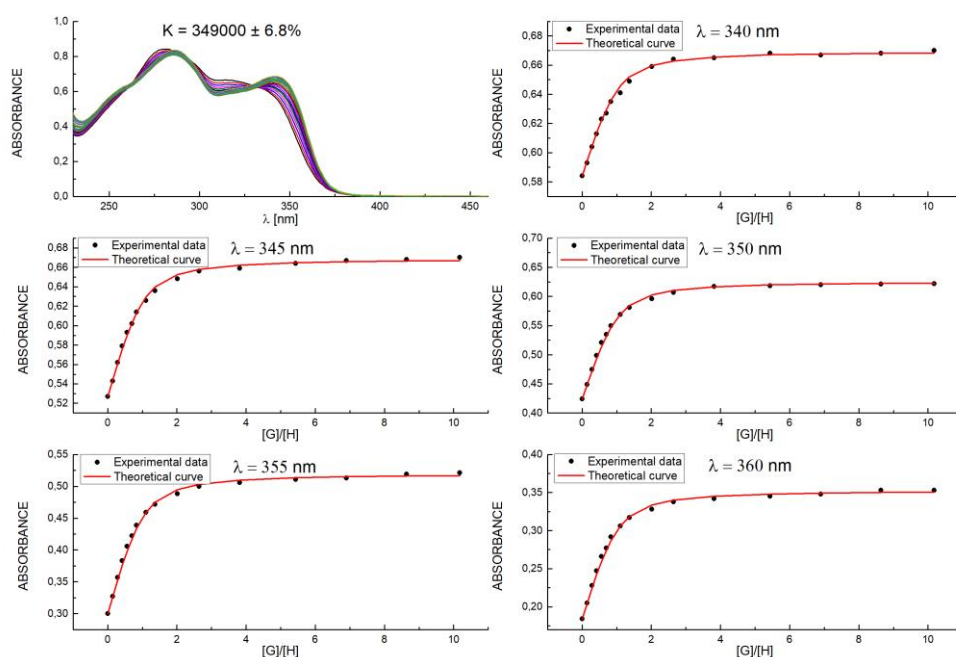

**Fig. S17.** UV-Vis titration of receptor **2** with TBACl in the presence of 1 equivalent of KPF<sub>6</sub> and selected binding isotherms in CH<sub>3</sub>CN.

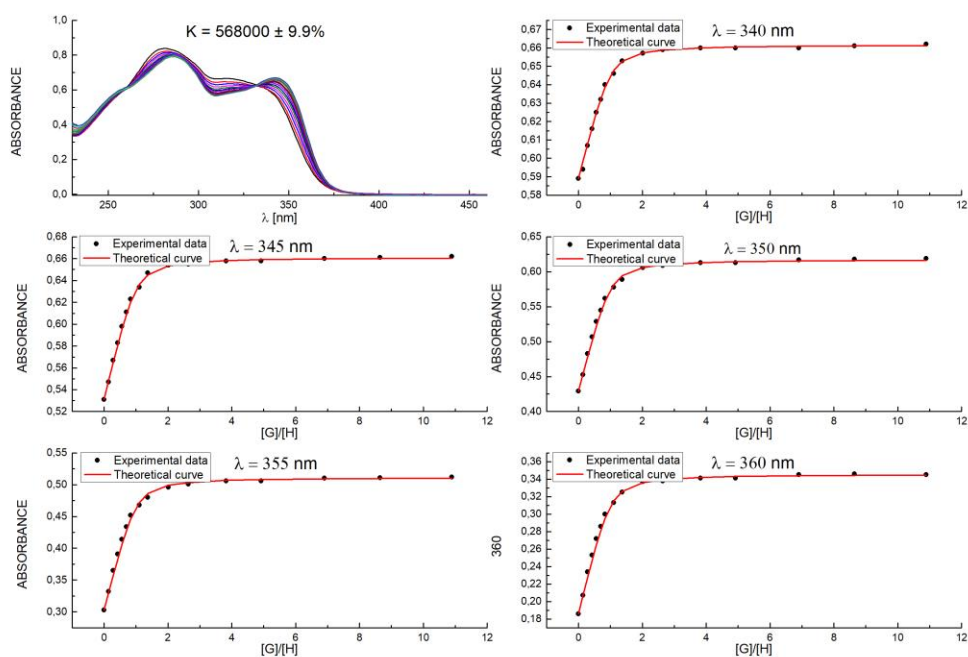

**Fig. S18.** UV-Vis titration of receptor **2** with TBABr and selected binding isotherms in  $\text{CH}_3\text{CN}$ .

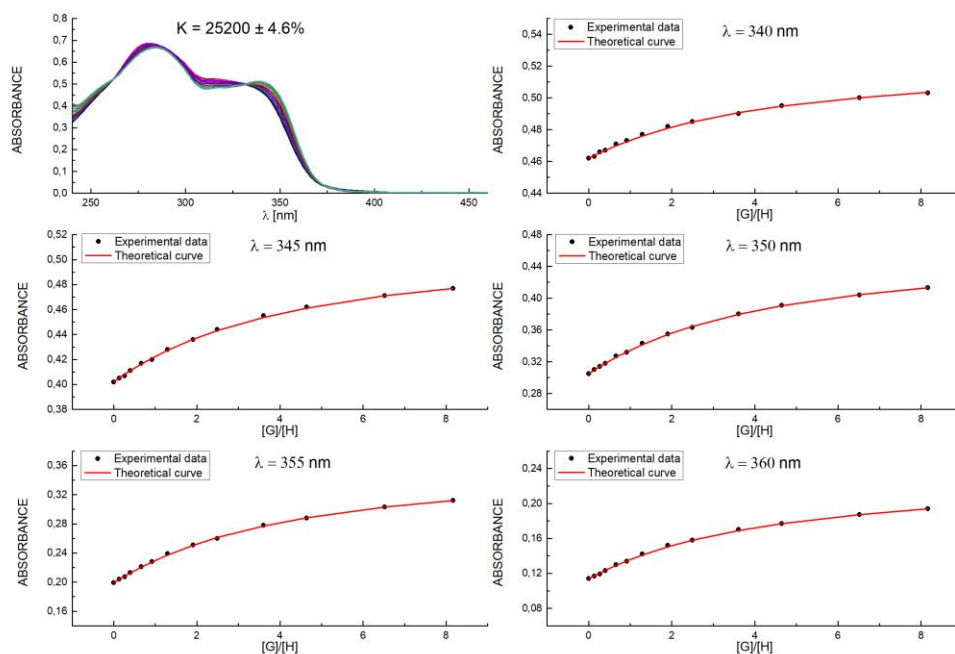

**Fig. S19.** UV-Vis titration of receptor **2** with TBABr in the presence of 1 equivalent of  $\text{NaClO}_4$  and selected binding isotherms in  $\text{CH}_3\text{CN}$ .

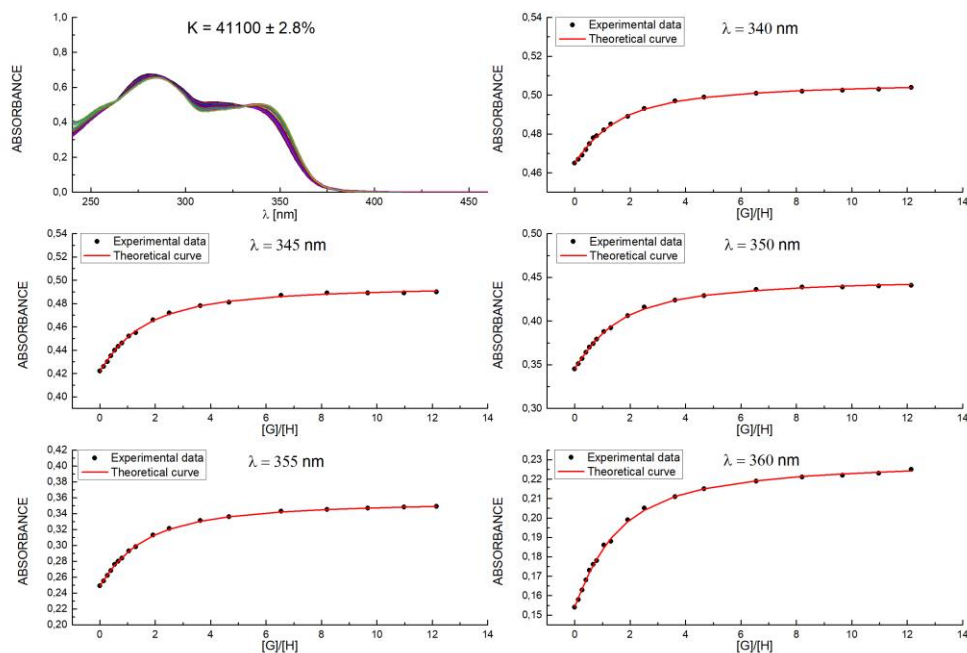

**Fig. S20.** UV-Vis titration of receptor **2** with TBABr in the presence of 1 equivalent of KPF<sub>6</sub> and selected binding isotherms in CH<sub>3</sub>CN.

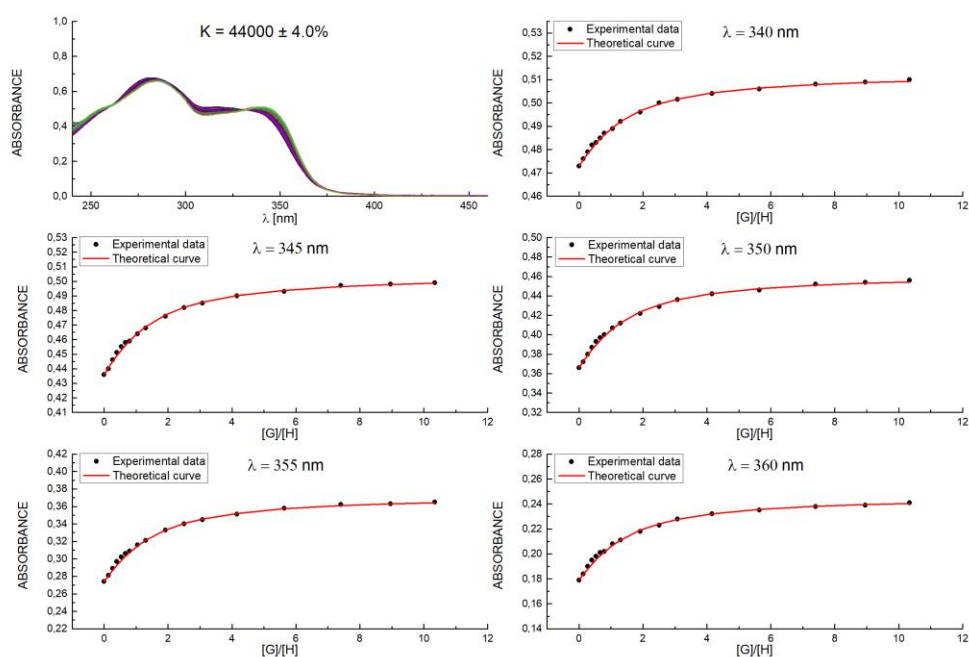

**Fig. S21.** UV-Vis titration of receptor **2** with TBANO<sub>2</sub> and selected binding isotherms in CH<sub>3</sub>CN.

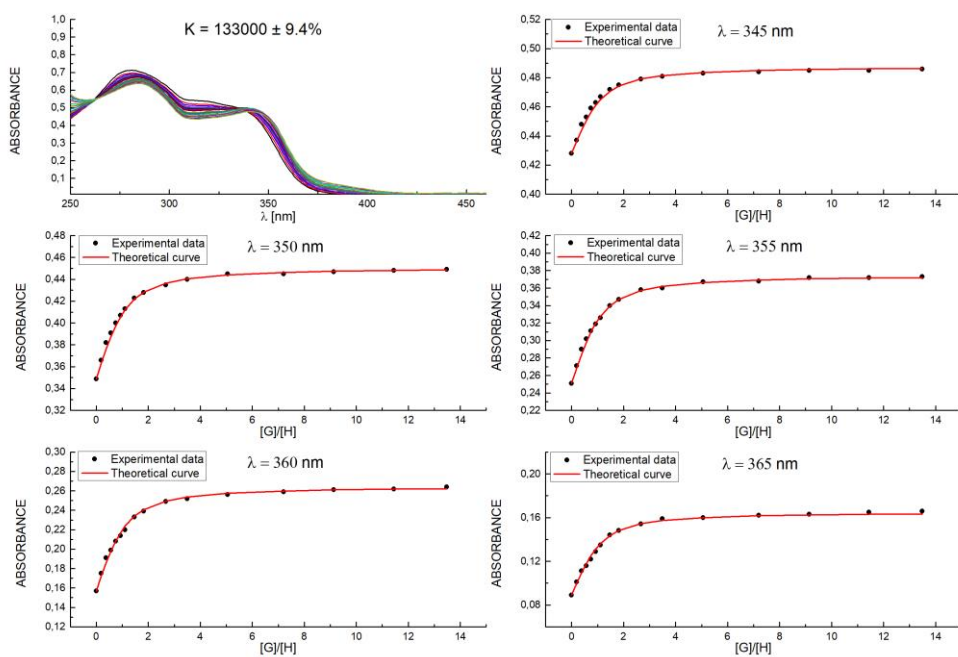

**Fig. S22.** UV-Vis titration of receptor **2** with TBANO<sub>2</sub> in the presence of 1 equivalent of NaClO<sub>4</sub> and selected binding isotherms in CH<sub>3</sub>CN.

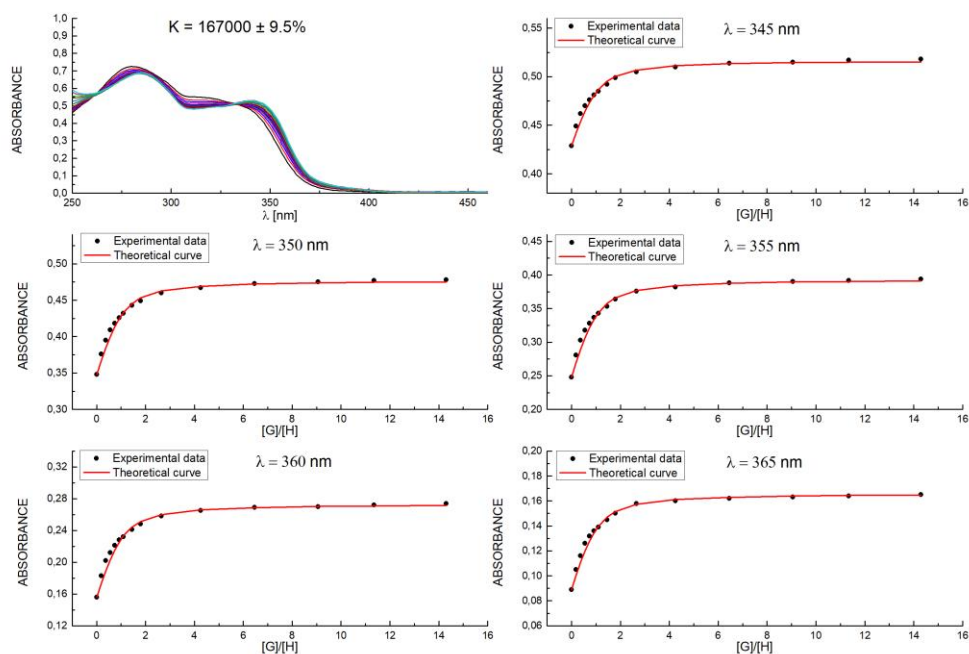

**Fig. S23.** UV-Vis titration of receptor **2** with TBANO<sub>2</sub> in the presence of 1 equivalent of KPF<sub>6</sub> and selected binding isotherms in CH<sub>3</sub>CN.

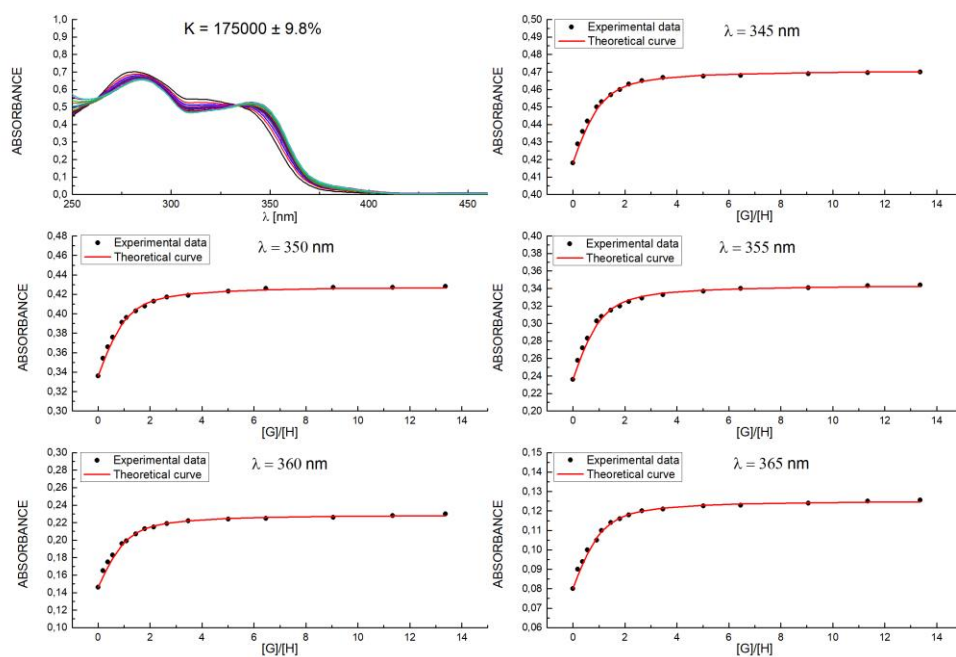

**Fig. S24.** UV-Vis titration of receptor **2** with TBANO<sub>3</sub> and selected binding isotherms in CH<sub>3</sub>CN.

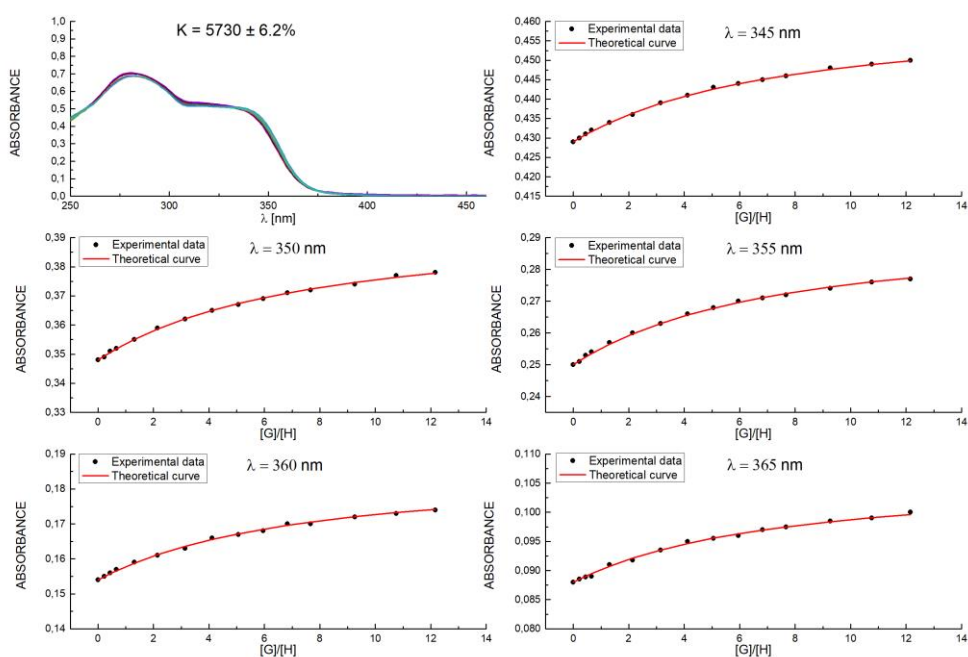

**Fig. S25.** UV-Vis titration of receptor **2** with TBANO<sub>3</sub> in the presence of 1 equivalent of NaClO<sub>4</sub> and selected binding isotherms in CH<sub>3</sub>CN.

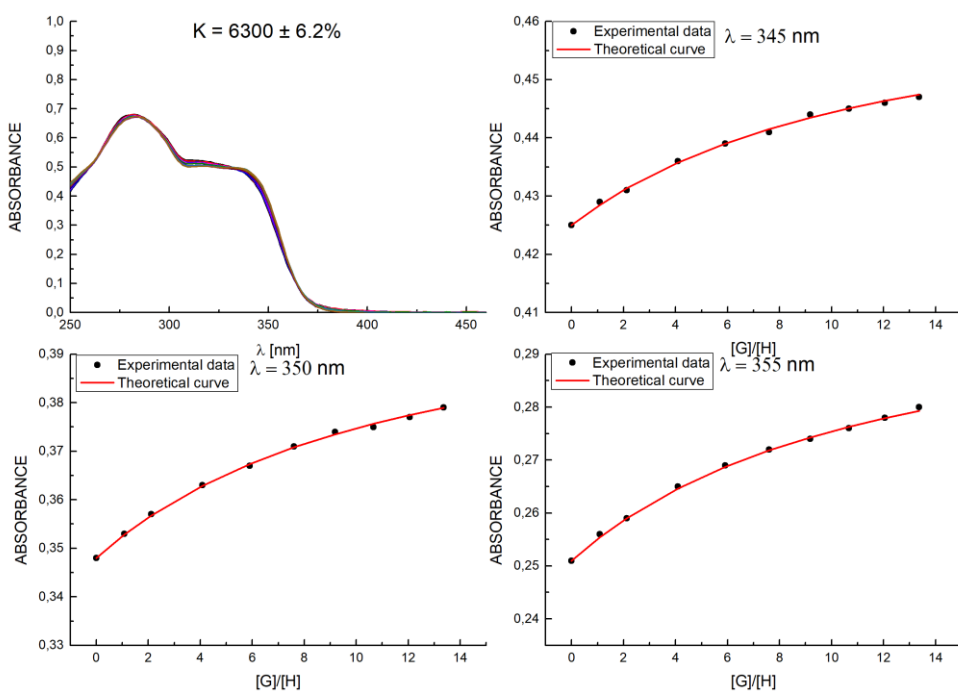



**Fig. S26.** UV-Vis titration of receptor **2** with TBANO<sub>3</sub> in the presence of 1 equivalent of KPF<sub>6</sub> and selected binding isotherms in CH<sub>3</sub>CN.

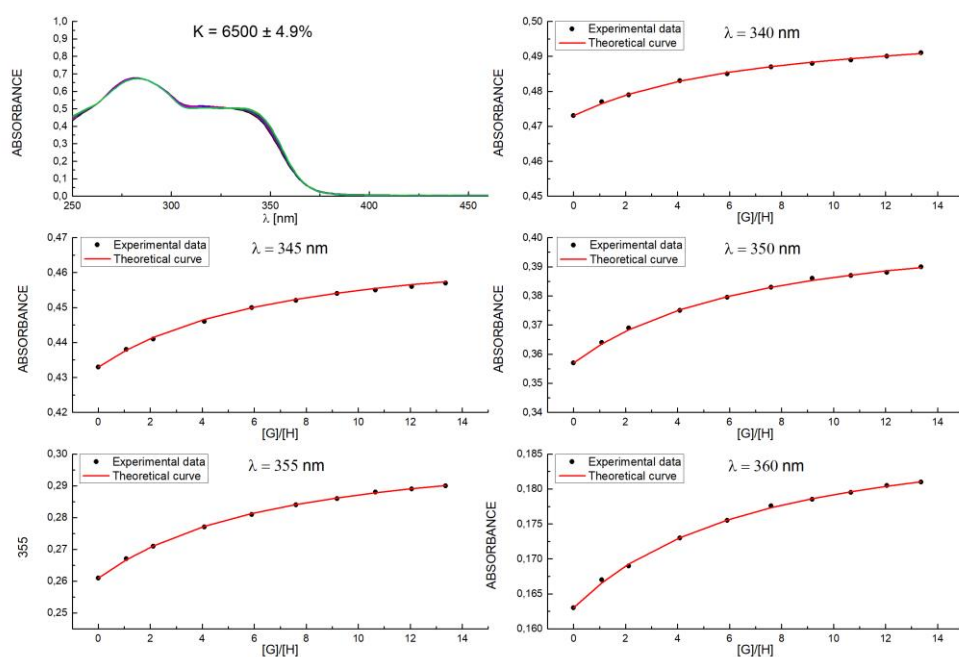

**Fig. S27.** UV-Vis titration spectra of receptor **2** with TBAOH in CH<sub>3</sub>CN.

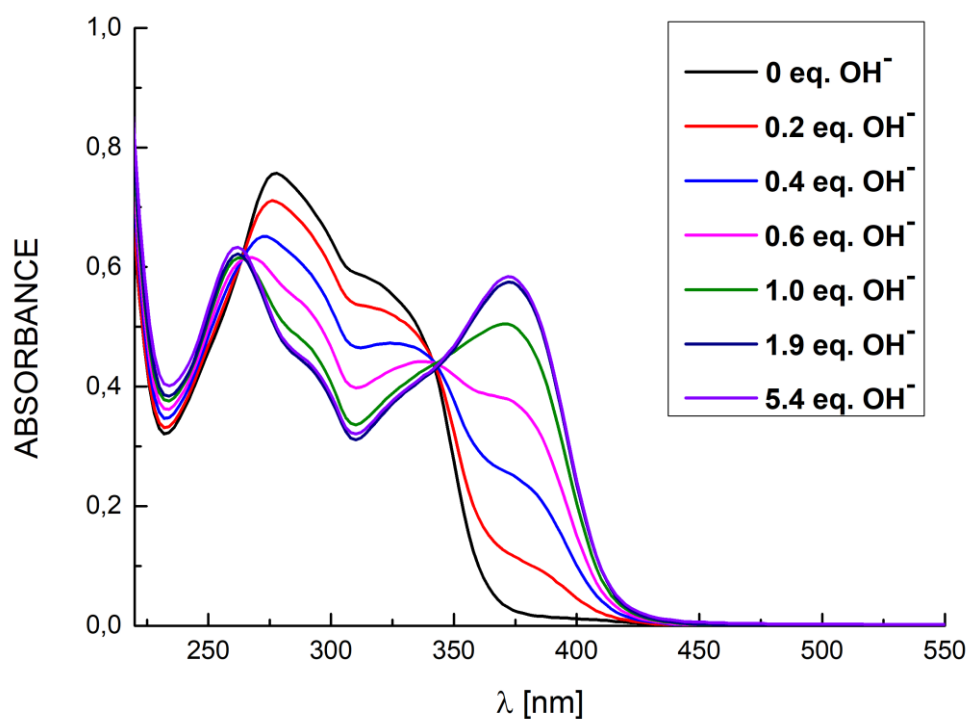

**Fig. S28.** UV-Vis titration spectra of receptor **2** with TBACH<sub>3</sub>COO in CH<sub>3</sub>CN.

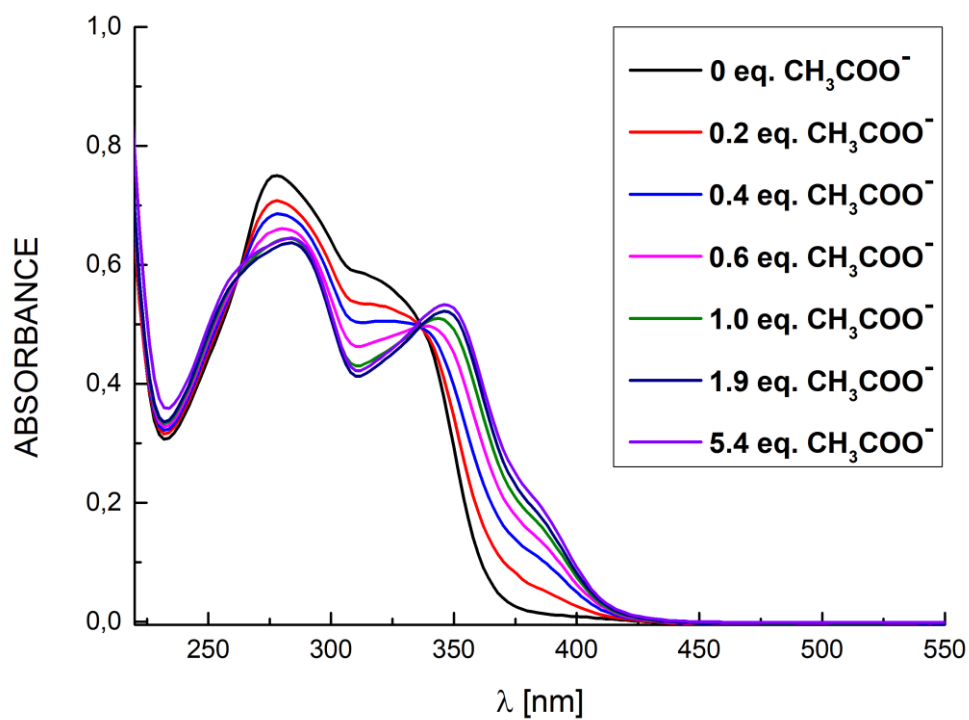

**Fig. S29.** UV-Vis titration spectra of receptor **2** with TBAPhCOO in CH<sub>3</sub>CN.

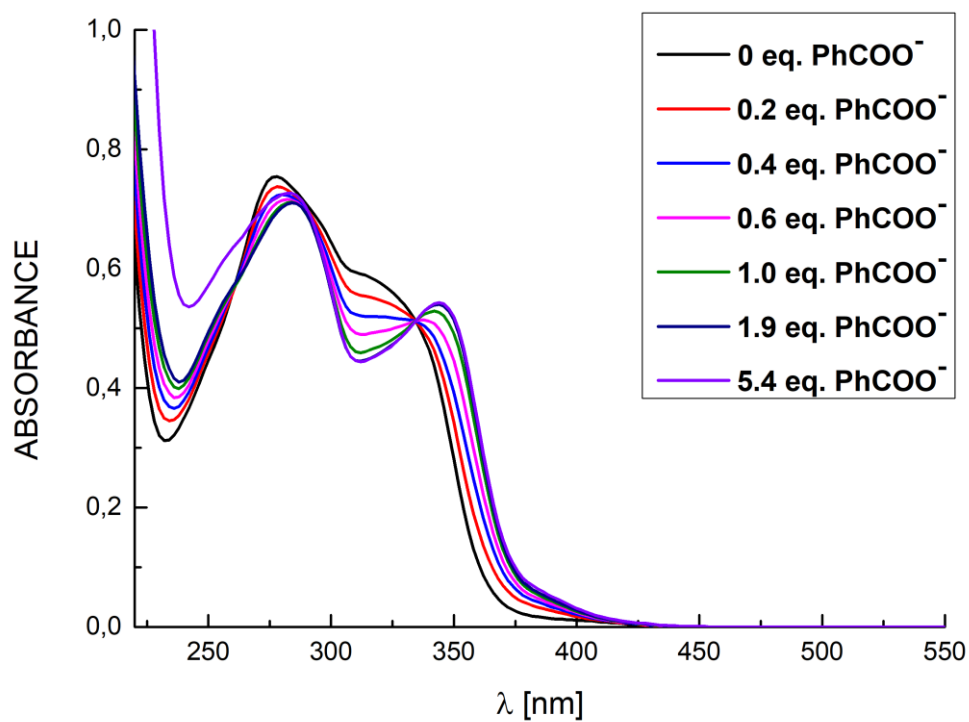



**Fig. S30.** UV-Vis titration of receptor **2** with TBACl in 0.5% H<sub>2</sub>O in CH<sub>3</sub>CN and selected binding isotherms.

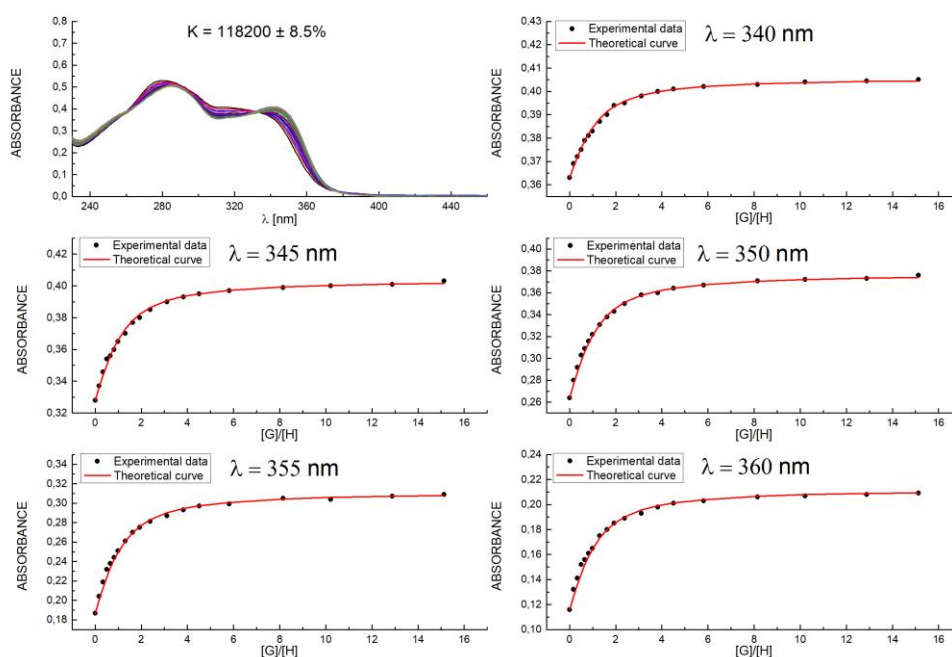

**Fig. S31.** UV-Vis titration of receptor **2** with TBACl in 0.5% H<sub>2</sub>O in CH<sub>3</sub>CN in the presence of 1 equivalent of NaClO<sub>4</sub> and selected binding isotherms.

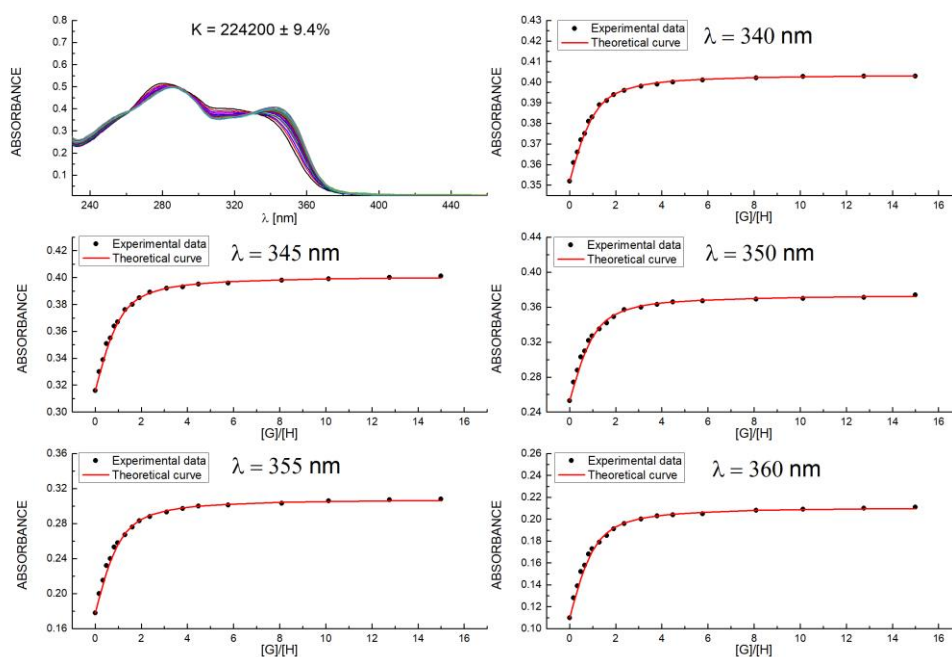

**Fig. S32.** UV-Vis titration of receptor **2** with TBACl in 0.5% H<sub>2</sub>O in CH<sub>3</sub>CN in the presence of 1 equivalent of KPF<sub>6</sub> and selected binding isotherms.

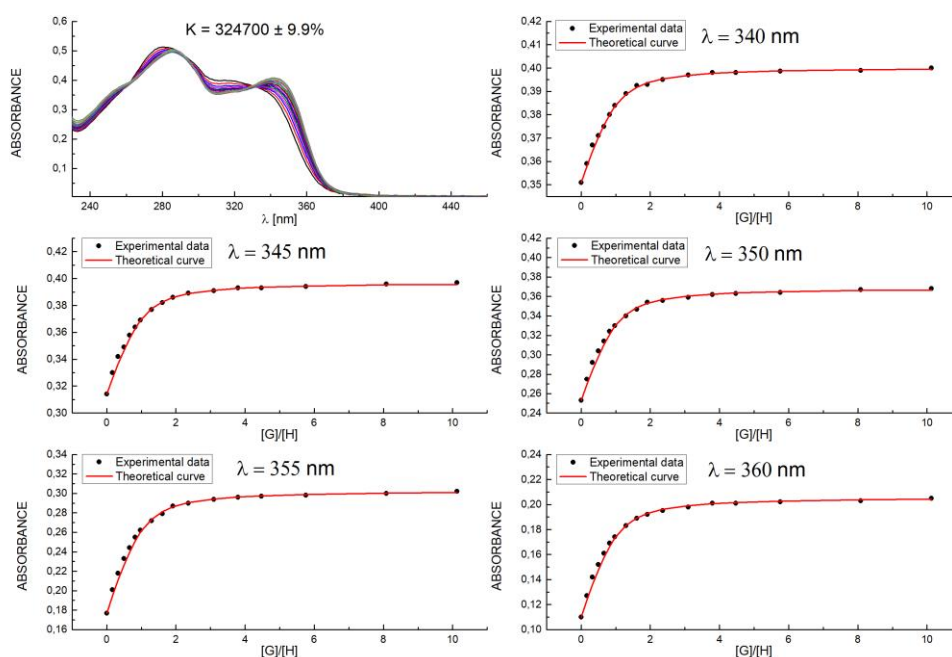

**Fig. S33.** UV-Vis titration of receptor **2** with TBACl in 1% H<sub>2</sub>O in CH<sub>3</sub>CN and selected binding isotherms.

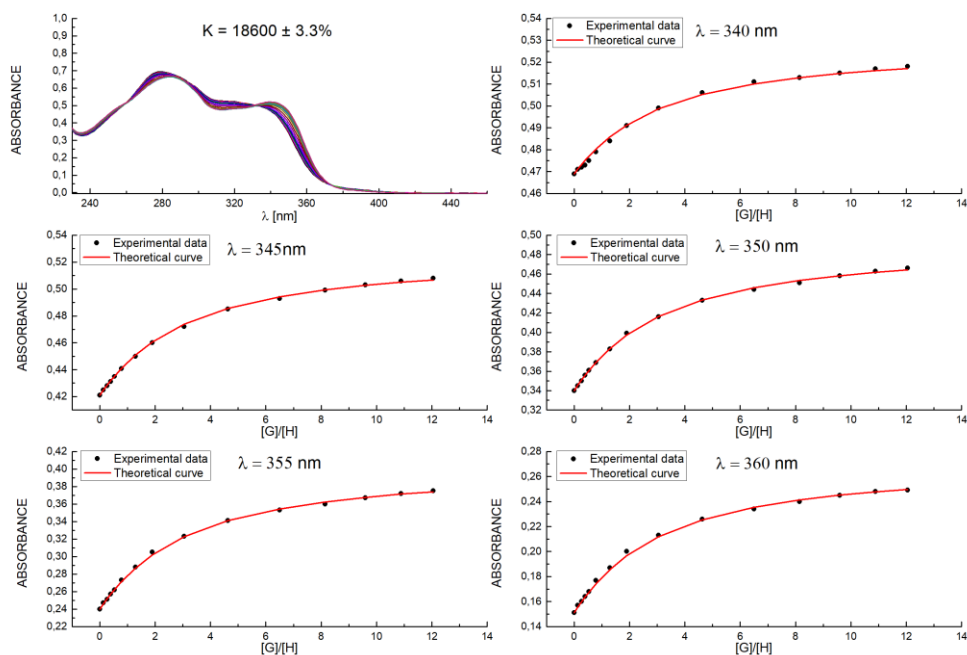

**Fig. S34.** UV-Vis titration of receptor **2** with TBACl in 1% H<sub>2</sub>O in CH<sub>3</sub>CN in the presence of 1 equivalent of NaClO<sub>4</sub> and selected binding isotherms.

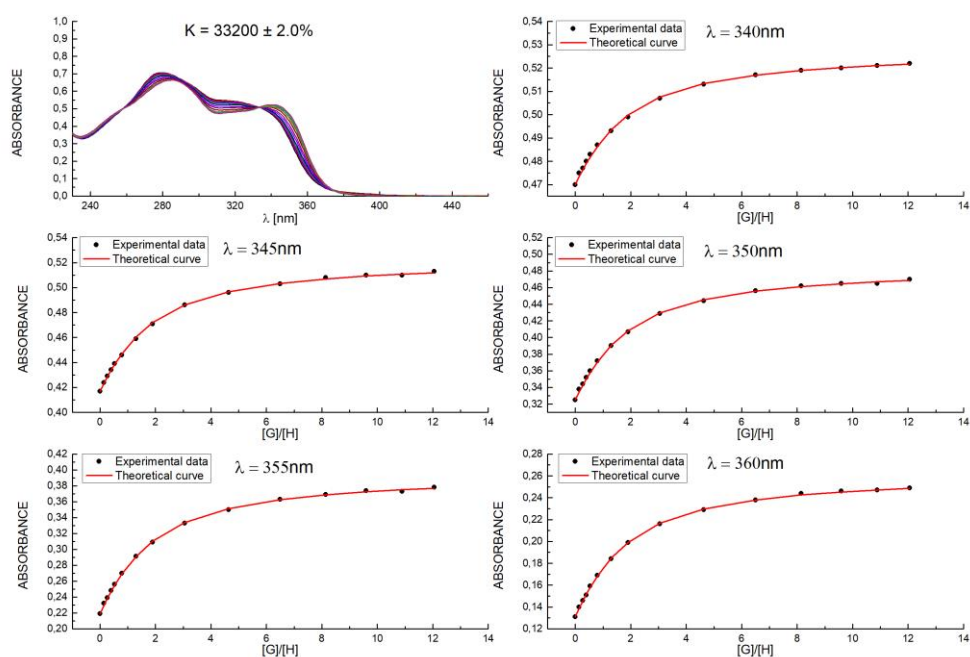

**Fig. S35.** UV-Vis titration of receptor **2** with TBACl in 1% H<sub>2</sub>O in CH<sub>3</sub>CN in the presence of 1 equivalent of KPF<sub>6</sub> and selected binding isotherms.

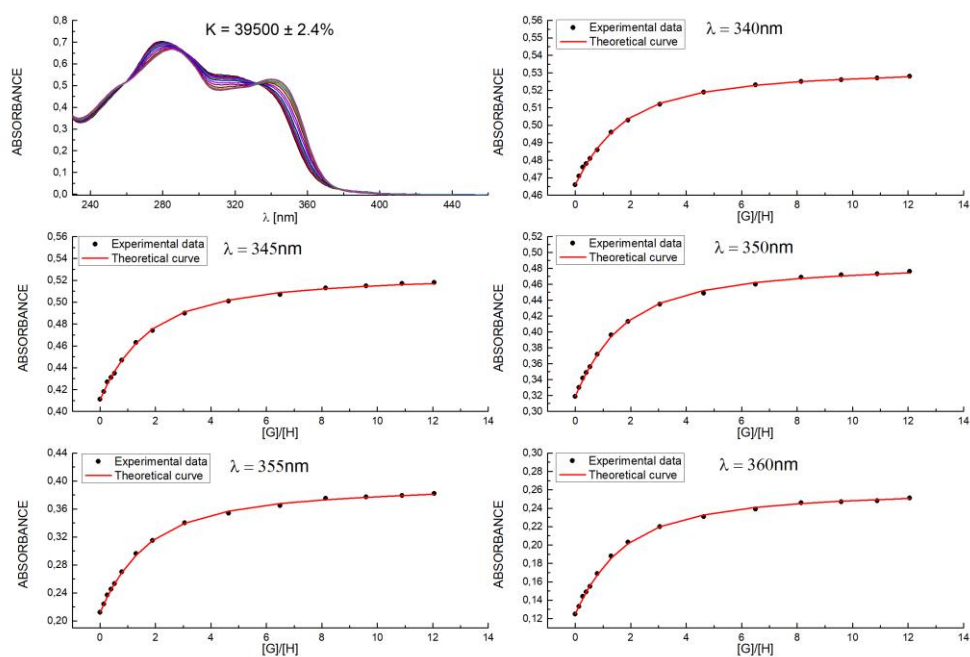

**Fig. S36.** UV-Vis titration of receptor **2** with NaCl in 5% H<sub>2</sub>O in CH<sub>3</sub>CN and selected binding isotherms.

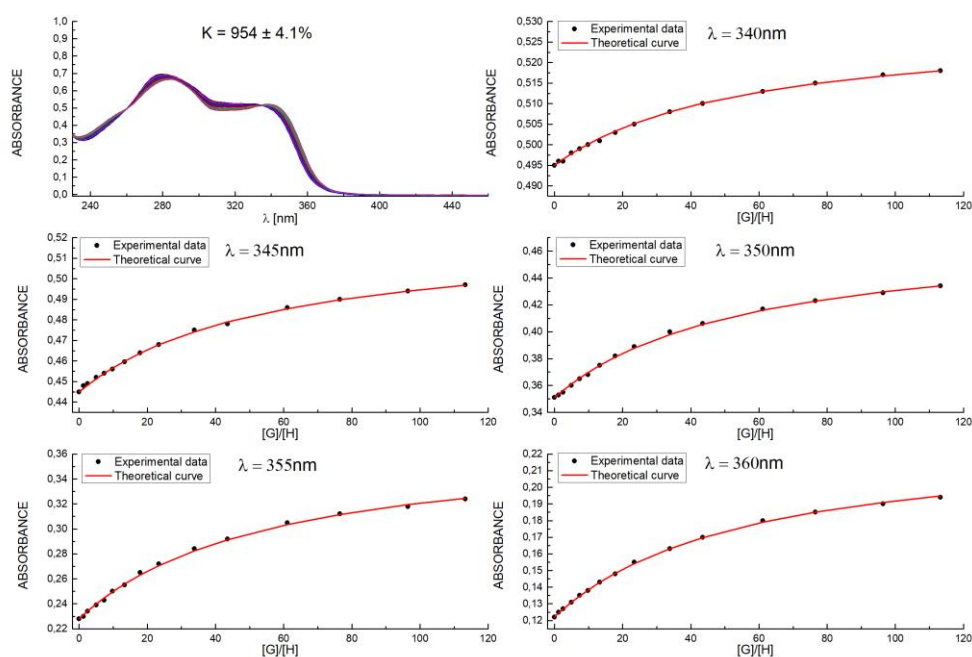

**Fig. S37.** UV-Vis titration of receptor **2** with KCl in 5% H<sub>2</sub>O in CH<sub>3</sub>CN and selected binding isotherms.

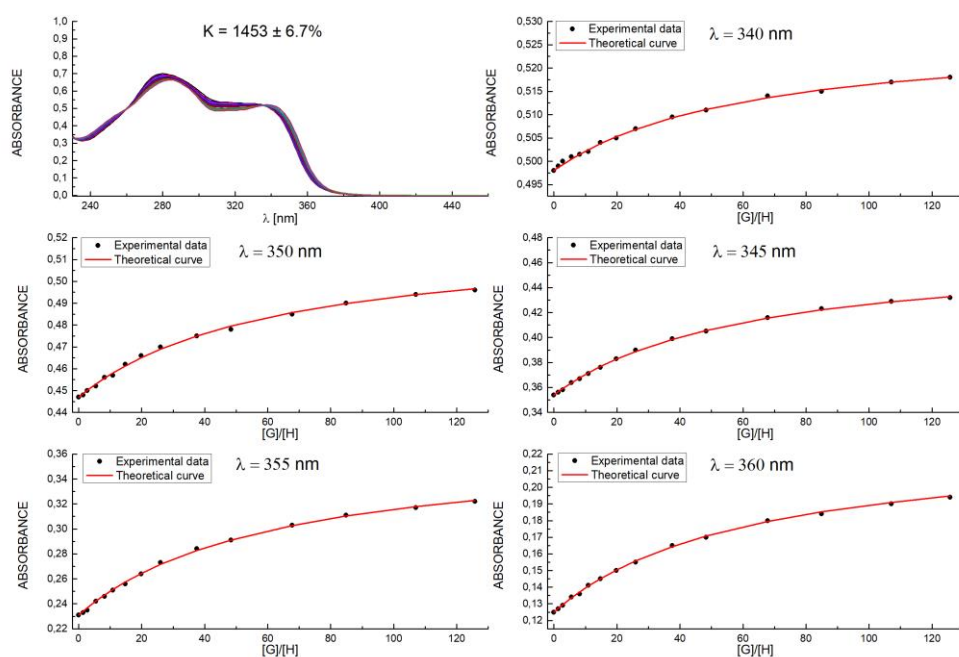

**Fig. S38.** UV-Vis titration of receptor **2** with TBA<sub>2</sub>SO<sub>4</sub> and selected binding isotherms in CH<sub>3</sub>CN.

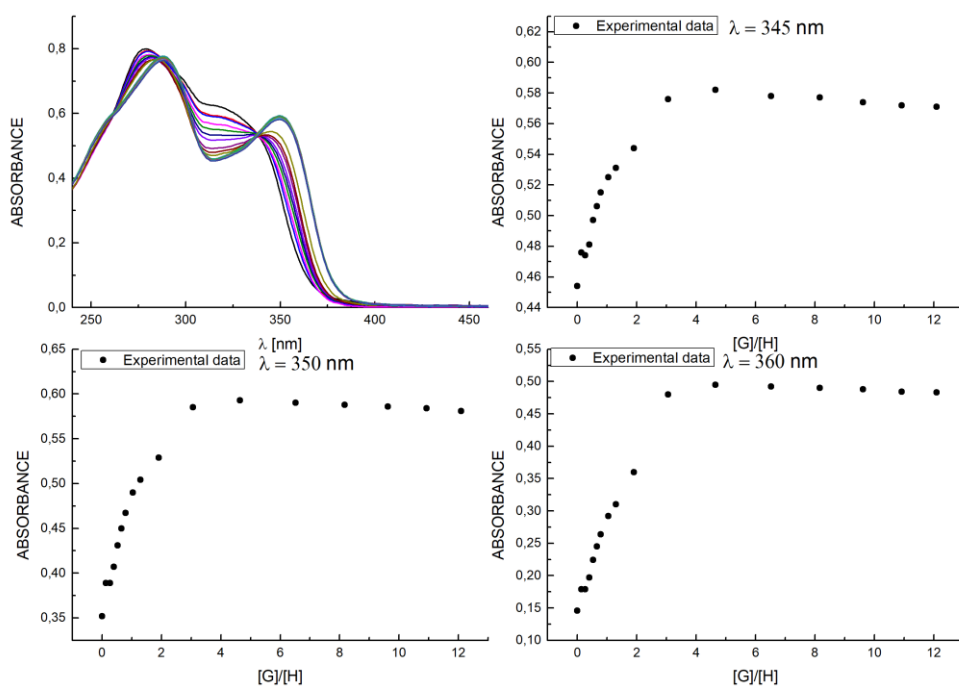

**Fig. S39.** UV-Vis titration of receptor **2** with TBA<sub>2</sub>SO<sub>4</sub> in the presence of 1 equivalent of NaClO<sub>4</sub> and selected binding isotherms in CH<sub>3</sub>CN.

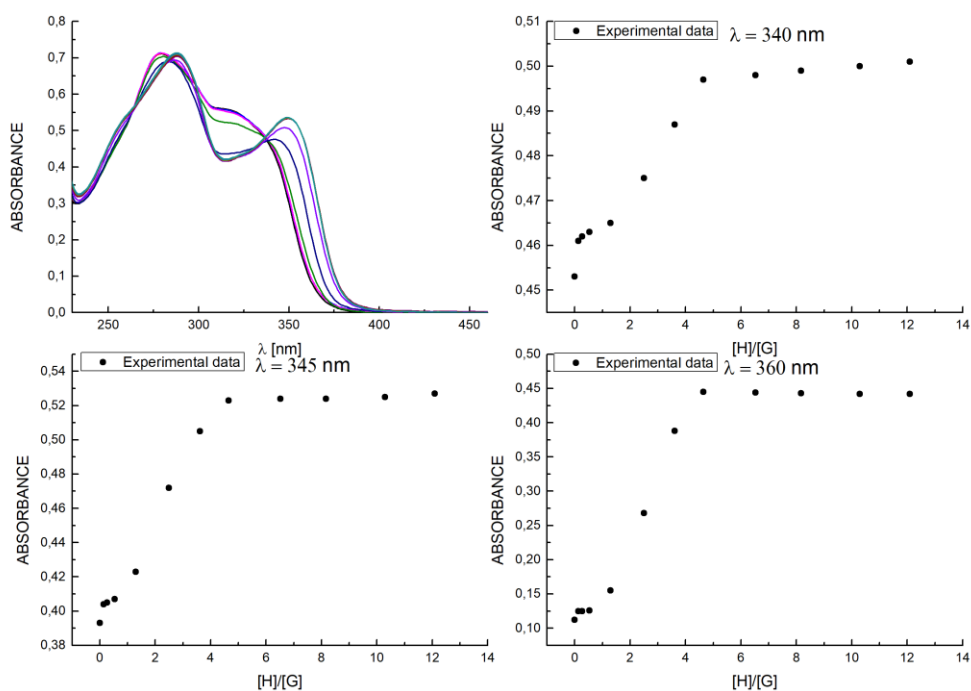

**Fig. S40.** UV-Vis titration of receptor **2** with  $\text{TBA}_2\text{SO}_4$  in the presence of 1 equivalent of  $\text{KPF}_6$  and selected binding isotherms in  $\text{CH}_3\text{CN}$ .

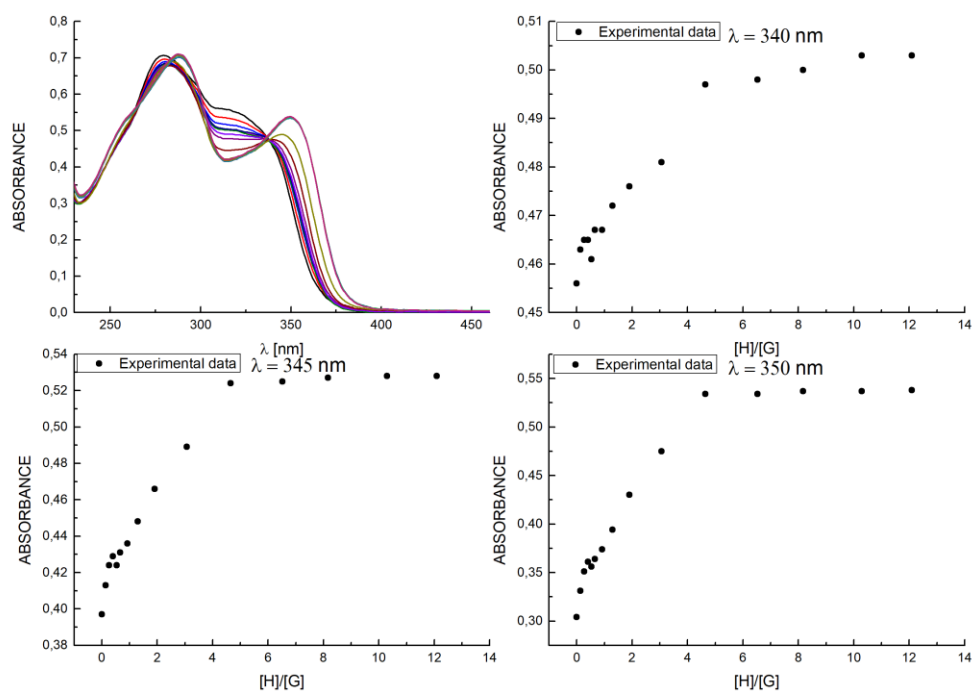

**Fig. S41.** UV-Vis titration of receptor **3** with  $\text{TBACl}$  and selected binding isotherms in  $\text{CH}_3\text{CN}$ .

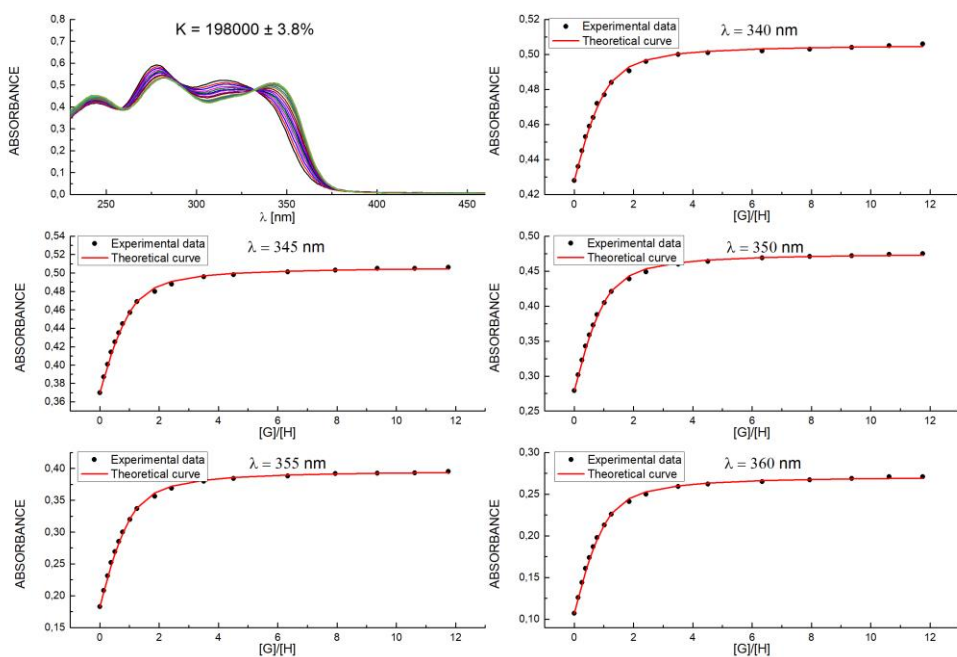

**Fig. S42.** UV-Vis titration of receptor **3** with TBACl in the presence of 1 equivalent of NaClO<sub>4</sub> and selected binding isotherms and selected binding isotherms in CH<sub>3</sub>CN.

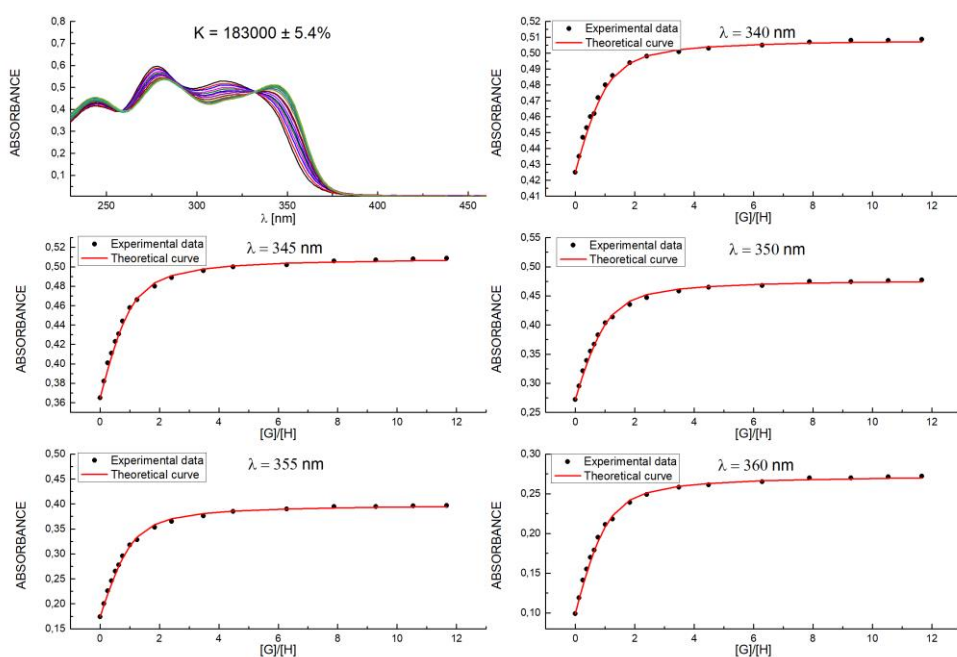

**Fig. S43.** UV-Vis titration of receptor **3** with TBACl in the presence of 1 equivalent of KPF<sub>6</sub> and selected binding isotherms and selected binding isotherms in CH<sub>3</sub>CN.

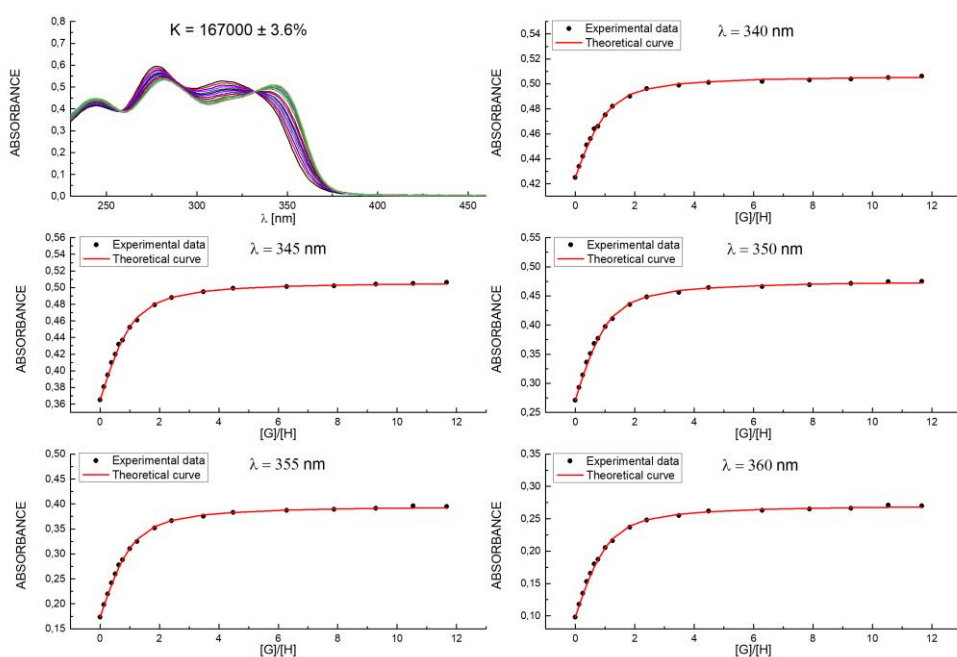



**Fig. S44.** UV-Vis titration of compounds **S2** with TBACl and selected binding isotherms in CH<sub>3</sub>CN.

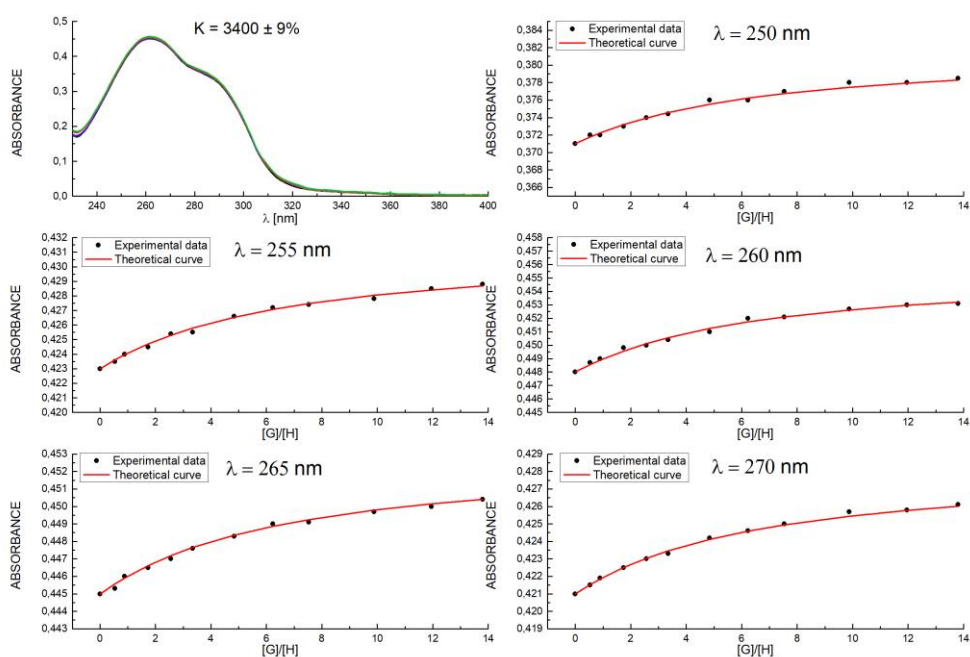

**Fig. S45.** UV-Vis titration of compounds **S2** with TBACl in the presence of 1 equivalent of NaClO<sub>4</sub> and selected binding isotherms and selected binding isotherms in CH<sub>3</sub>CN.

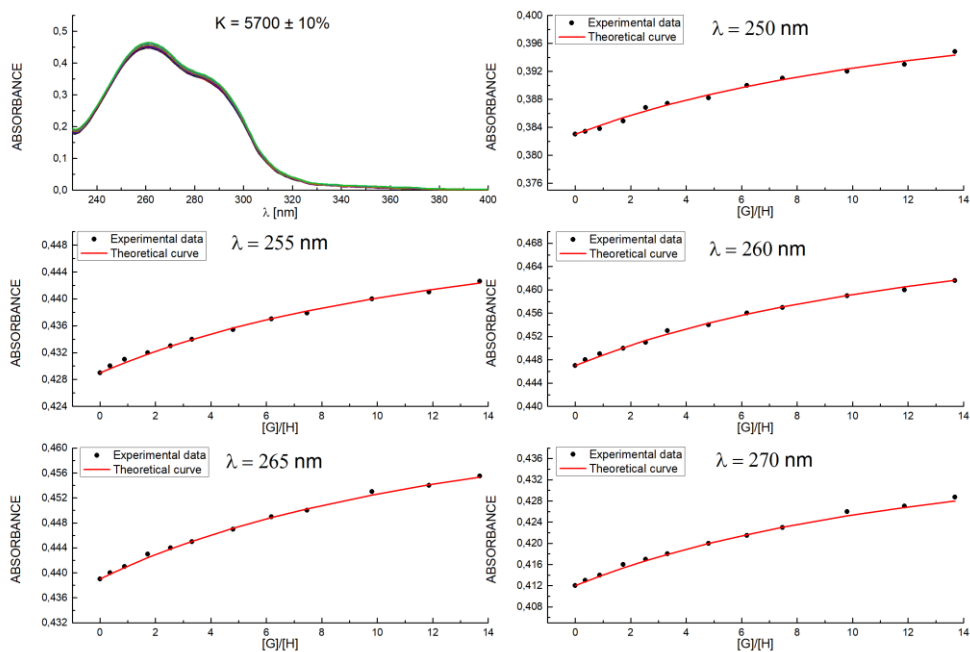



**Fig. S46.** UV-Vis titration of compounds **S2** with TBACl in the presence of 1 equivalent of KPF<sub>6</sub> and selected binding isotherms and selected binding isotherms in CH<sub>3</sub>CN.

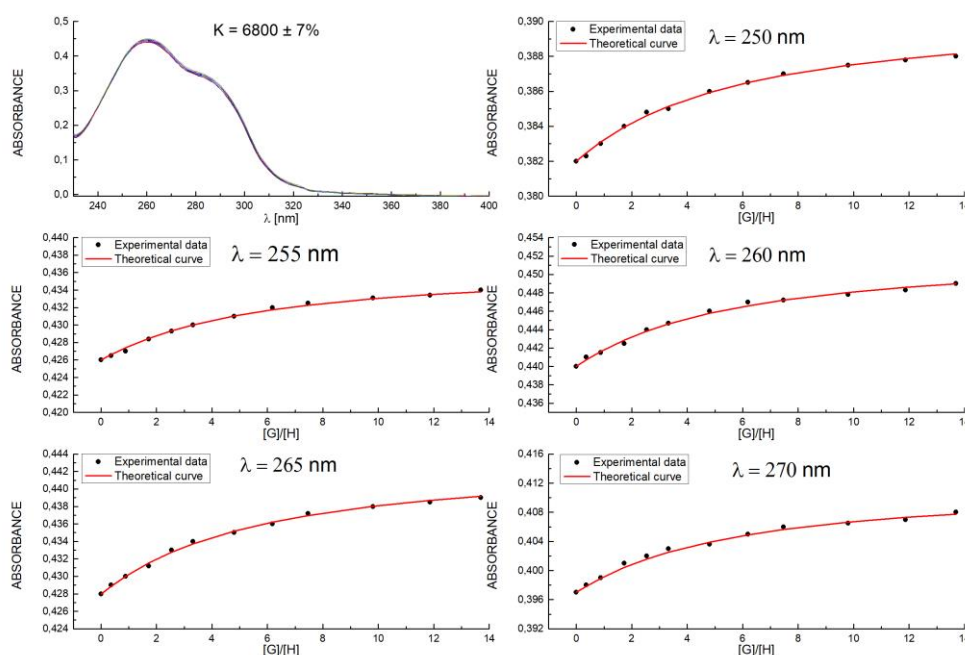

**Table S1.** Association constants ( $K_a$ ) for interactions between receptor **2** and chloride anions and apparent association constants for interaction of receptor **2** with anions in the presence of one equivalent of sodium perchlorate or potassium hexafluorophosphate in the presence of water.<sup>a</sup>

| Water content [%] | <b>2</b>      | <b>2</b> + 1eq. Na <sup>+</sup> | <b>2</b> + 1eq. K <sup>+</sup> |
|-------------------|---------------|---------------------------------|--------------------------------|
| <b>0.0</b>        | 275000 ± 8.5% | 349000 ± 6.8%                   | 568000 ± 9.9%                  |
| <b>0.5</b>        | 118300 ± 8.5% | 224200 ± 9.4%                   | 324700 ± 9.9%                  |
| <b>1.0</b>        | 18600 ± 3.3%  | 33200 ± 2.0%                    | 39500 ± 2.4%                   |

<sup>a</sup> UV-Vis, solvent CH<sub>3</sub>CN, 293 K, [2] = 2.50 · 10<sup>-5</sup> M, chloride added as TBA salt, [TBACl] ~ 0.8 mM; M<sup>-1</sup>.

## 2D NMR SPECTRA AND NMR TITRATION EXPERIMENTS

The <sup>1</sup>H NMR titration was performed on a Bruker 300 spectrometer, at 298K in CD<sub>3</sub>CN. In each case, a 500 μL of freshly prepared 2.55 mM solution of receptors was added to a 5mm NMR tube. In the case of ion pair titration receptor **1**, **2** and **3** was firstly pretreated with three equivalent of KPF<sub>6</sub> or NaClO<sub>4</sub> (refers to receptor). In the event of ion pair titration receptor **4** was firstly pretreated with one equivalent of KPF<sub>6</sub> or NaClO<sub>4</sub>. Then small aliquots of solution of TBAX, containing receptors at constant concentration and in case of **1**, **2**, **3** three equivalent of KPF<sub>6</sub> or NaClO<sub>4</sub> and one equivalent of this salts in the case of **4**, were added and a spectrum was acquired after each addition. The resulting titration data were analyzed using BindFit (v0.5) package, available online at <http://supramolecular.org>

**Fig. S47:** ROESY spectrum of **2** in CD<sub>3</sub>CN.

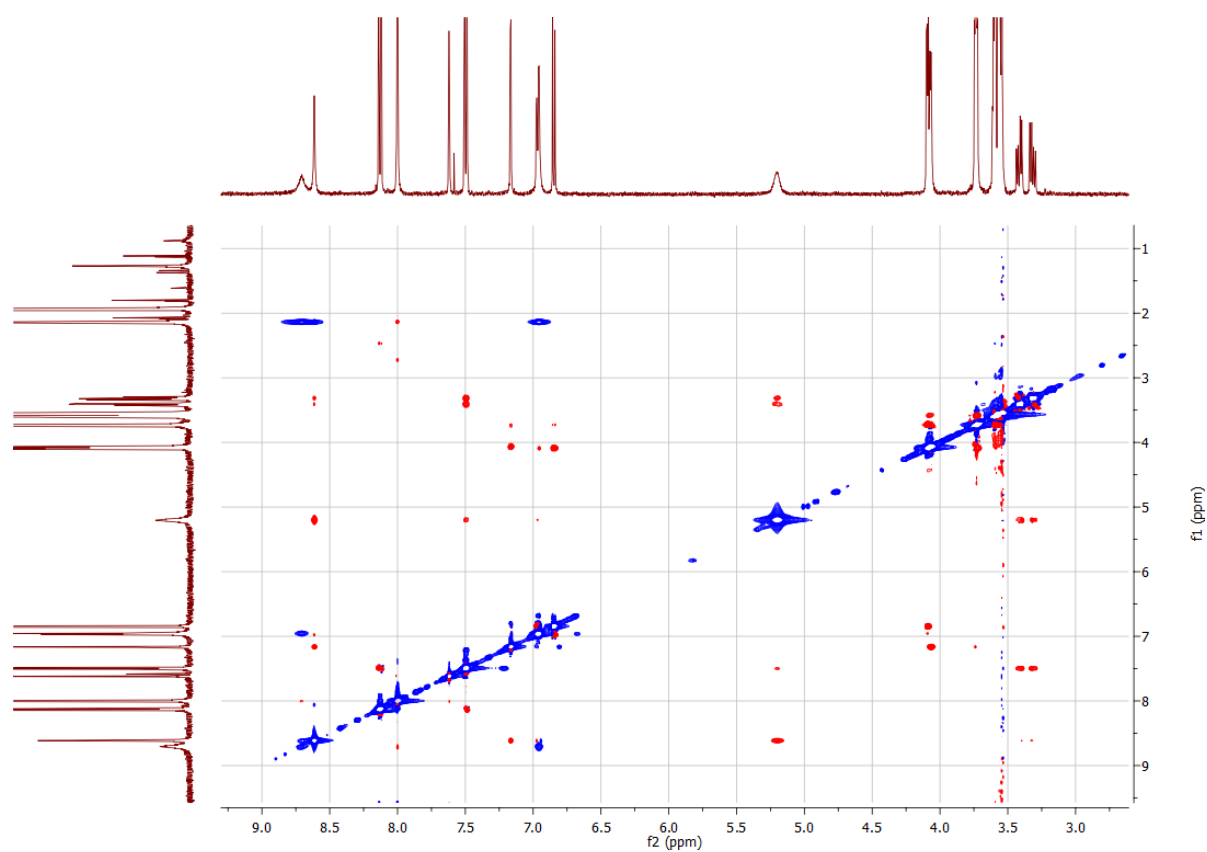

**Fig. S48:** HMBC spectrum of **2** in CD<sub>3</sub>CN.

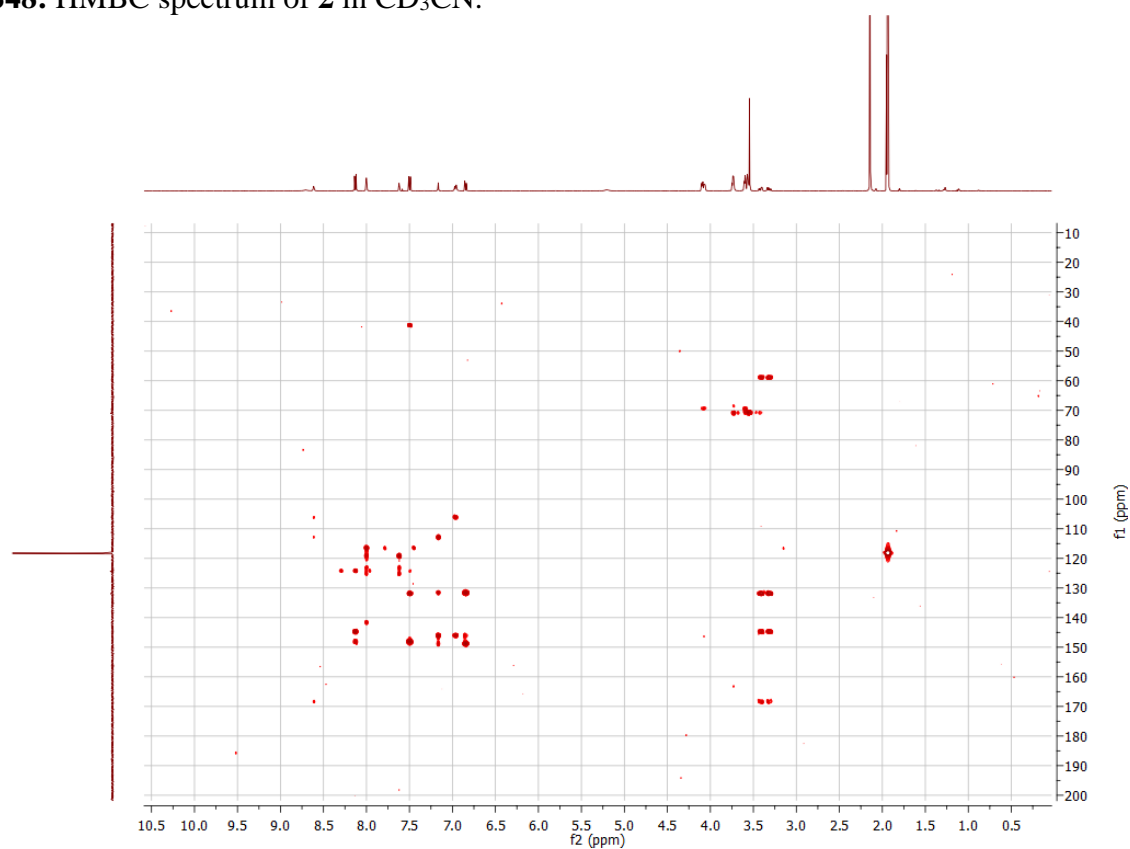

**Fig. S48a.** Partial  $^1\text{H}$  NMR of **2** in  $\text{CD}_3\text{CN}$  along with assigned protons signals.

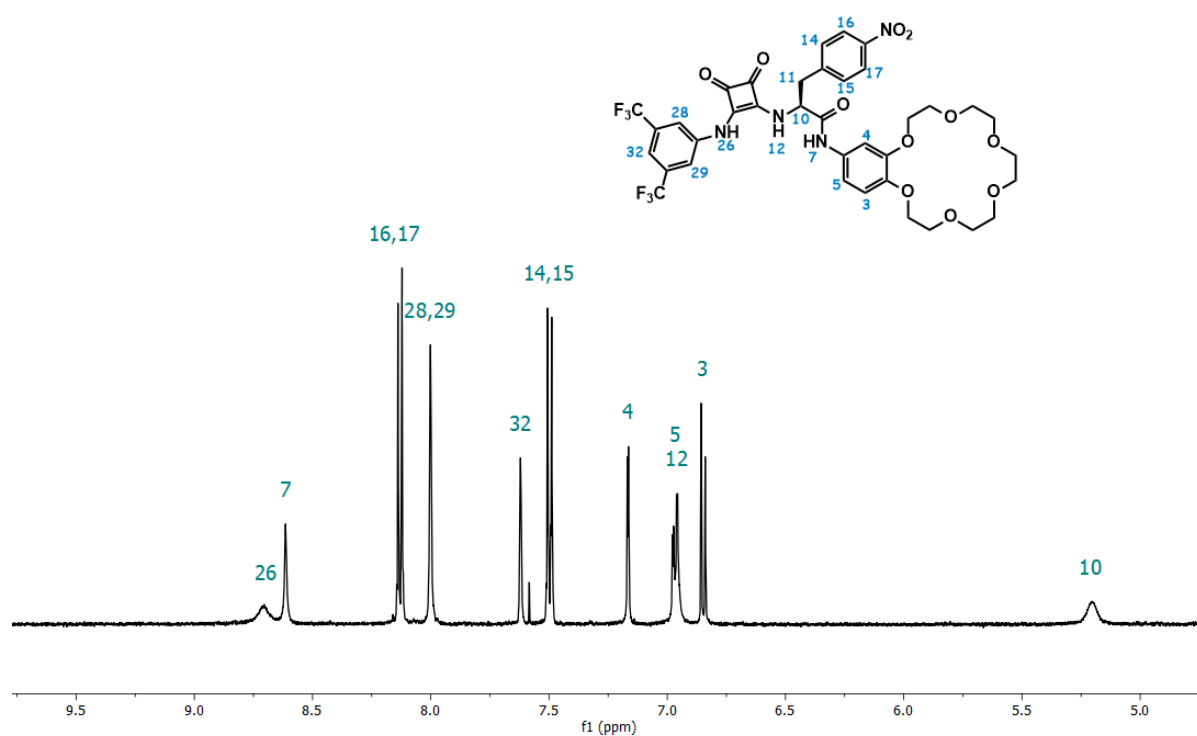

**Fig. S48b.**  $^1\text{H}$  NMR of **2** in DMSO along with assigned carbon signals.

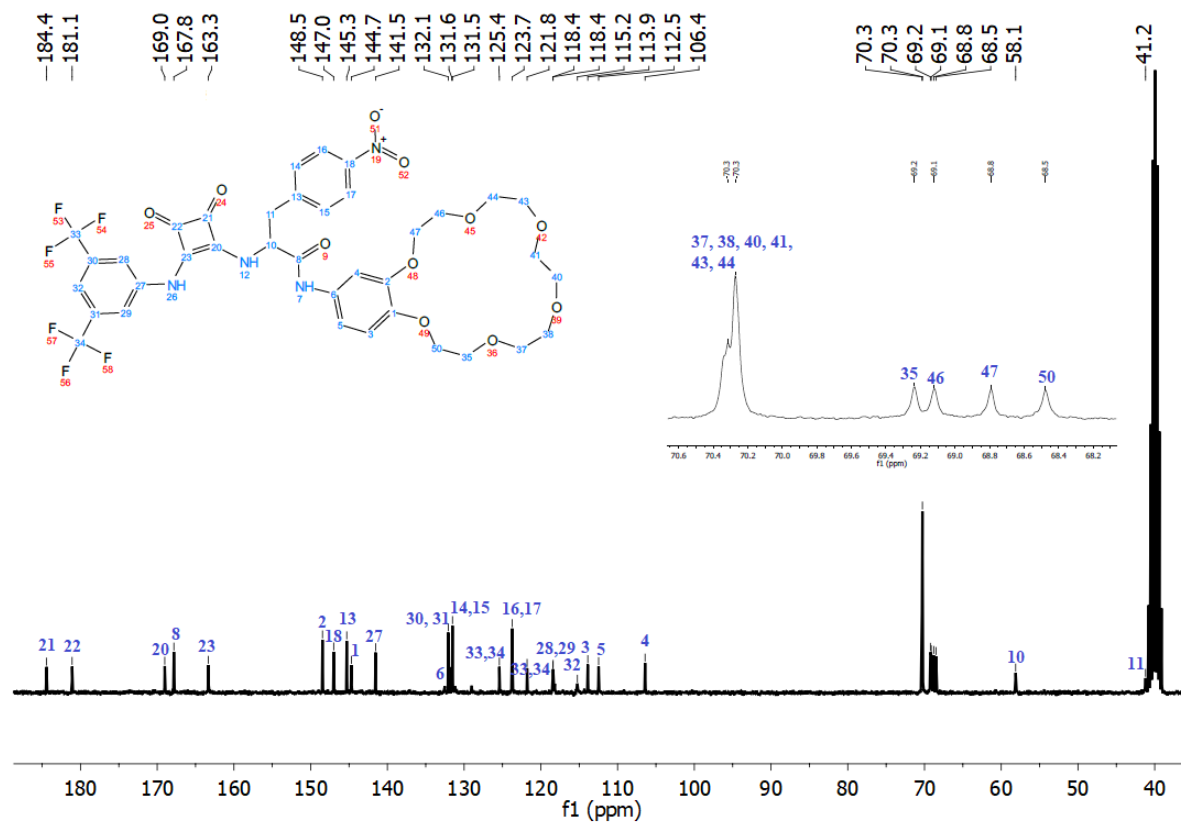

**Fig. S49.**  $^1\text{H}$  NMR spectra recorded upon titration of receptor **4** in  $\text{CD}_3\text{CN}$  with TBACl.

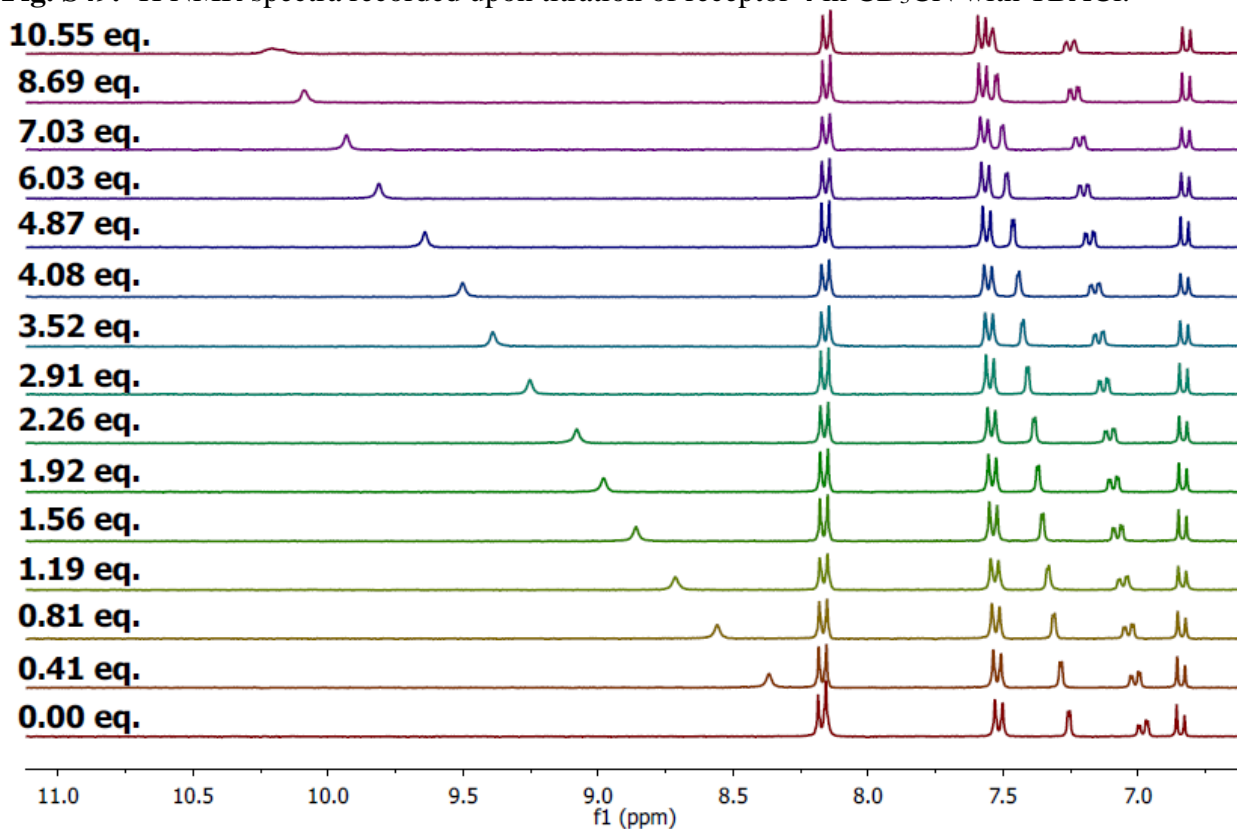

**Fig. S50.**  $^1\text{H}$  NMR titration binding isotherms of receptor **4** ( $3.11 \cdot 10^{-3}\text{M}$ ) in  $\text{CD}_3\text{CN}$  upon addition of increasing amounts of TBACl.

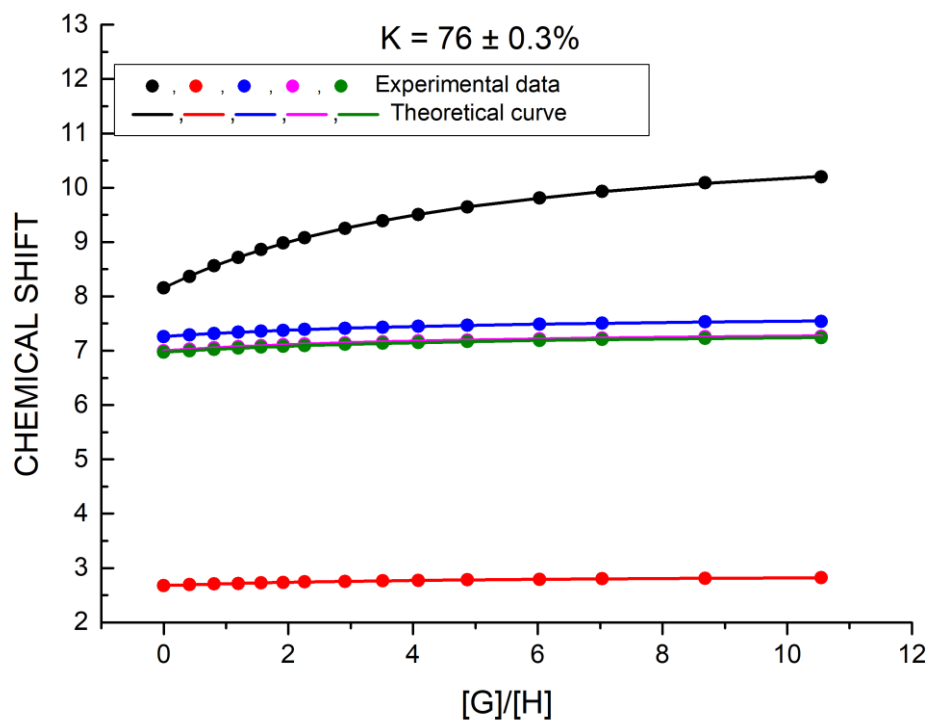

**Fig. S51.**  $^1\text{H}$  NMR spectra recorded upon titration of receptor **4** in  $\text{CD}_3\text{CN}$  with TBACl in the presence of 1 eq.  $\text{KPF}_6$ .

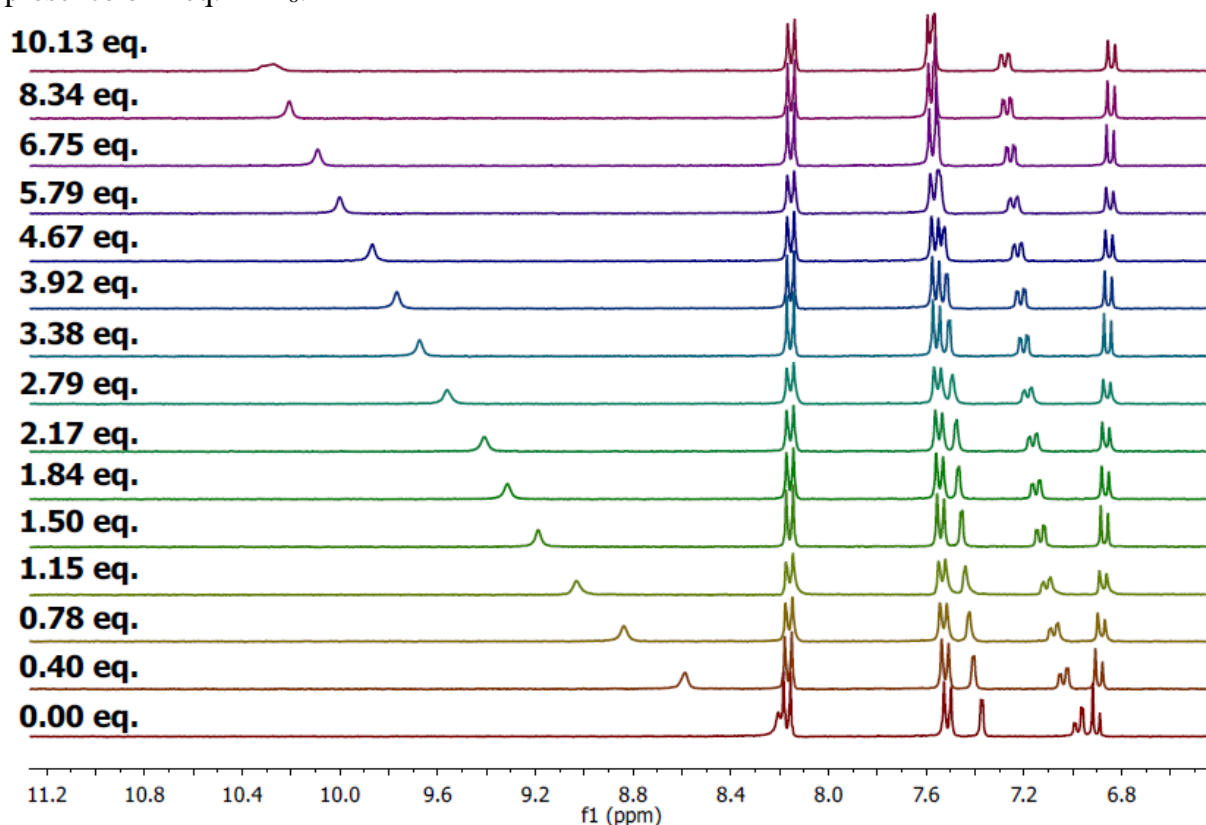

**Fig. S52.**  $^1\text{H}$  NMR titration binding isotherms of receptor **4** ( $3.11 \cdot 10^{-3}\text{M}$ ) in  $\text{CD}_3\text{CN}$  upon addition of increasing amounts of TBACl in the presence of  $\text{KPF}_6$ .

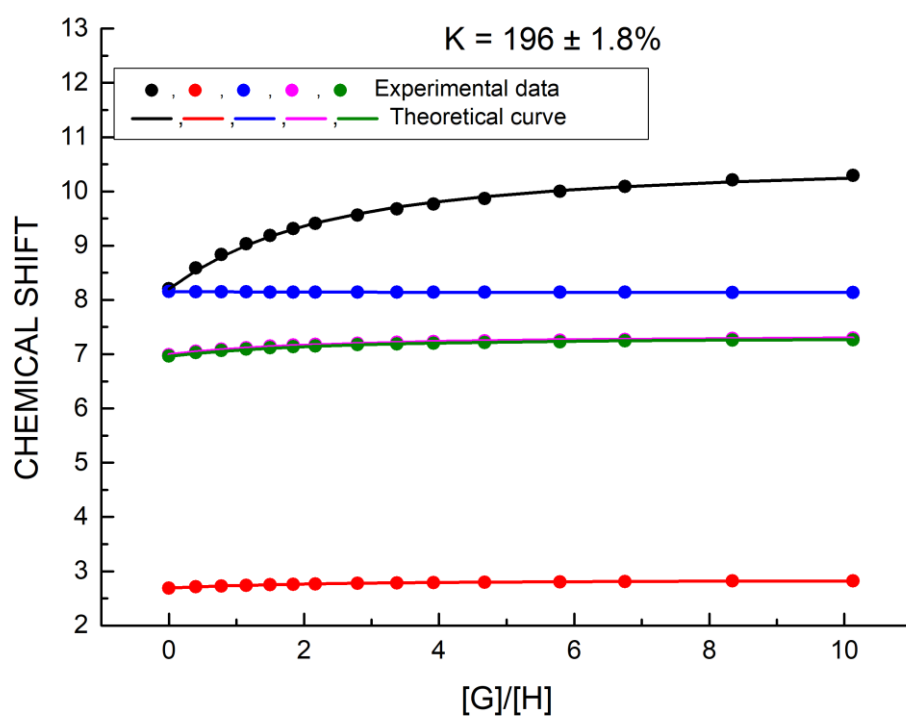

Fig. S53.  $^1\text{H}$  NMR spectra recorded upon titration of receptor **2** in  $\text{CD}_3\text{CN}$  with TBACl.

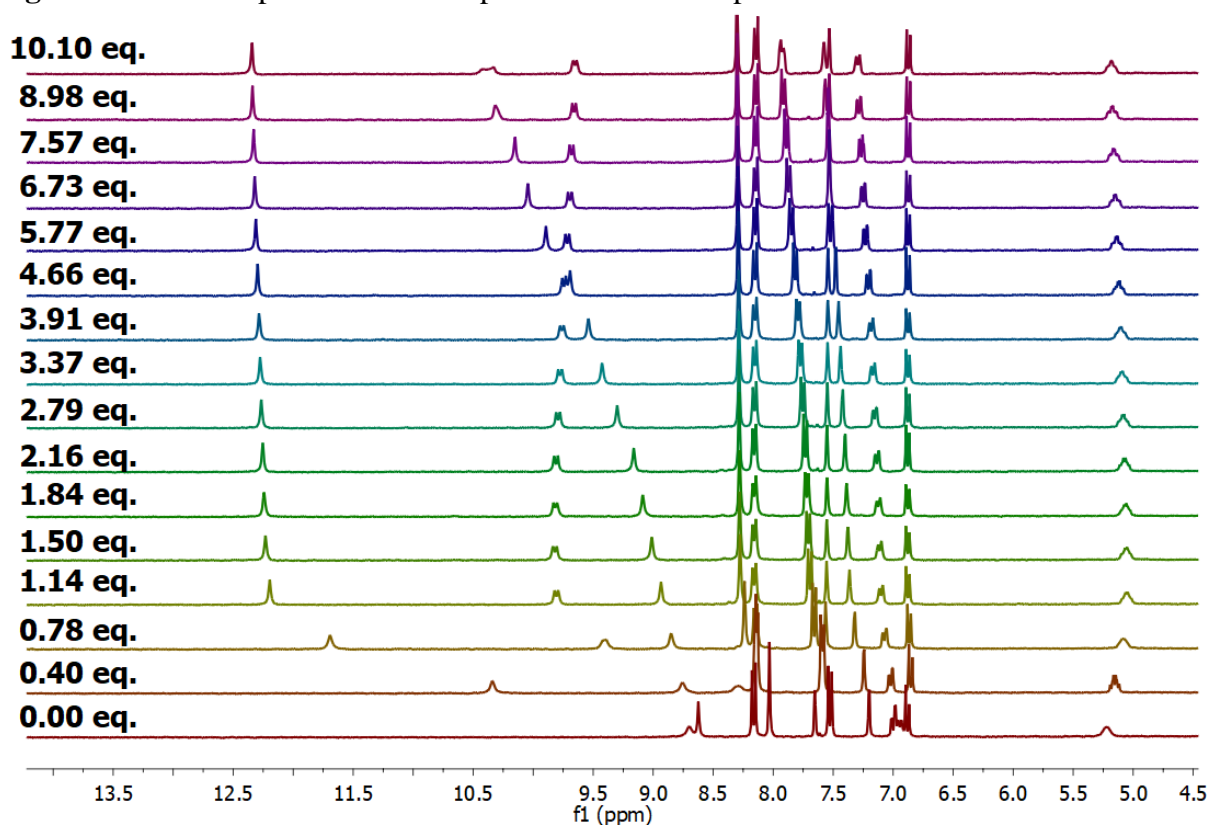

Fig. S54.  $^1\text{H}$  NMR spectra recorded upon titration of receptor **2** in  $\text{CD}_3\text{CN}$  with TBACl in the presence of 1 eq.  $\text{KPF}_6$ .

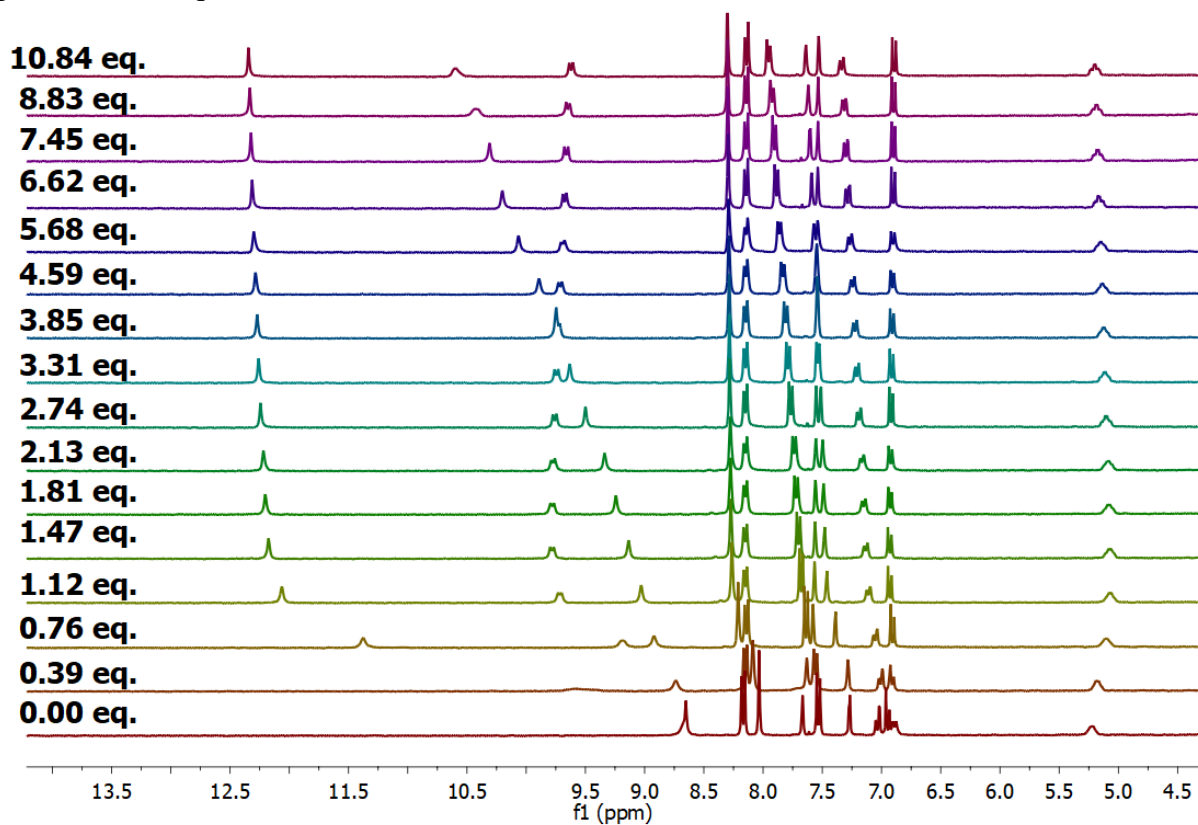

**Fig. S55:** ROESY spectrum of **2** with 10 equivalents of TBACl in CD<sub>3</sub>CN.

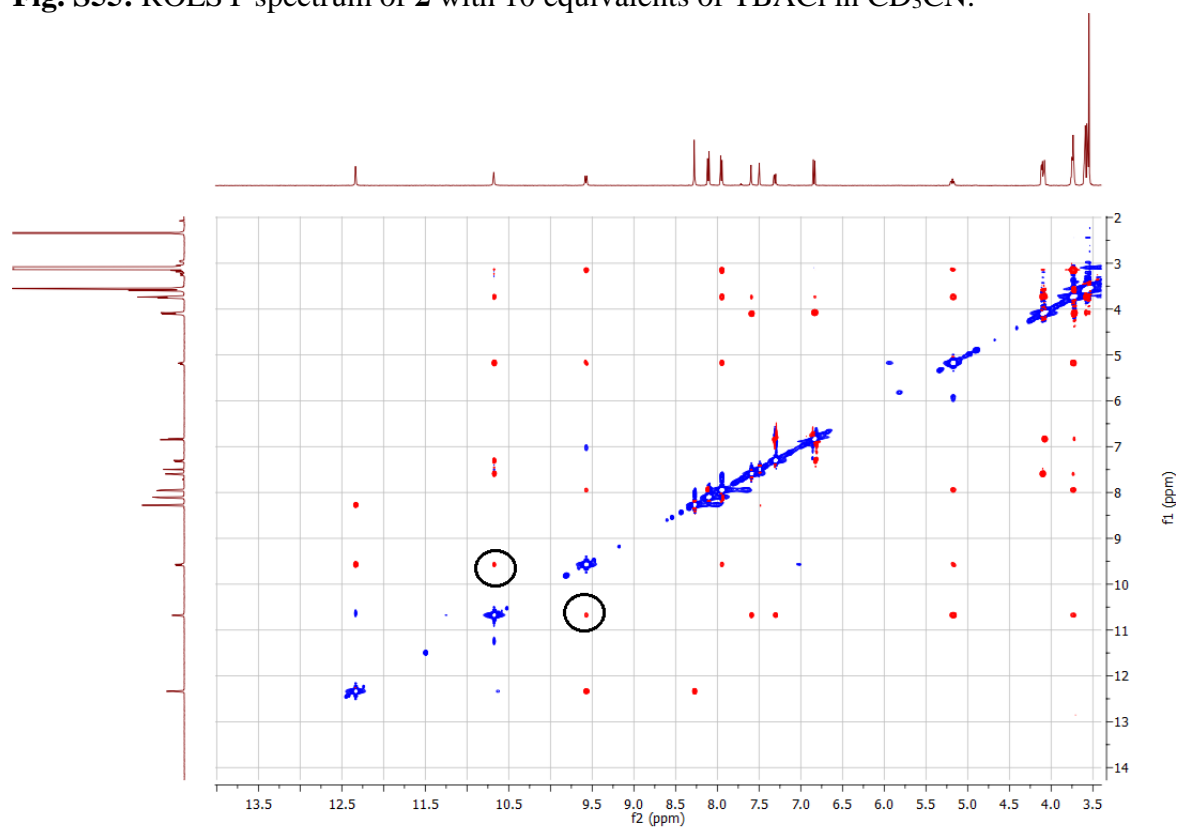

**Fig. S55a:** ROESY spectrum of **2** in CD<sub>3</sub>CN (zoom).

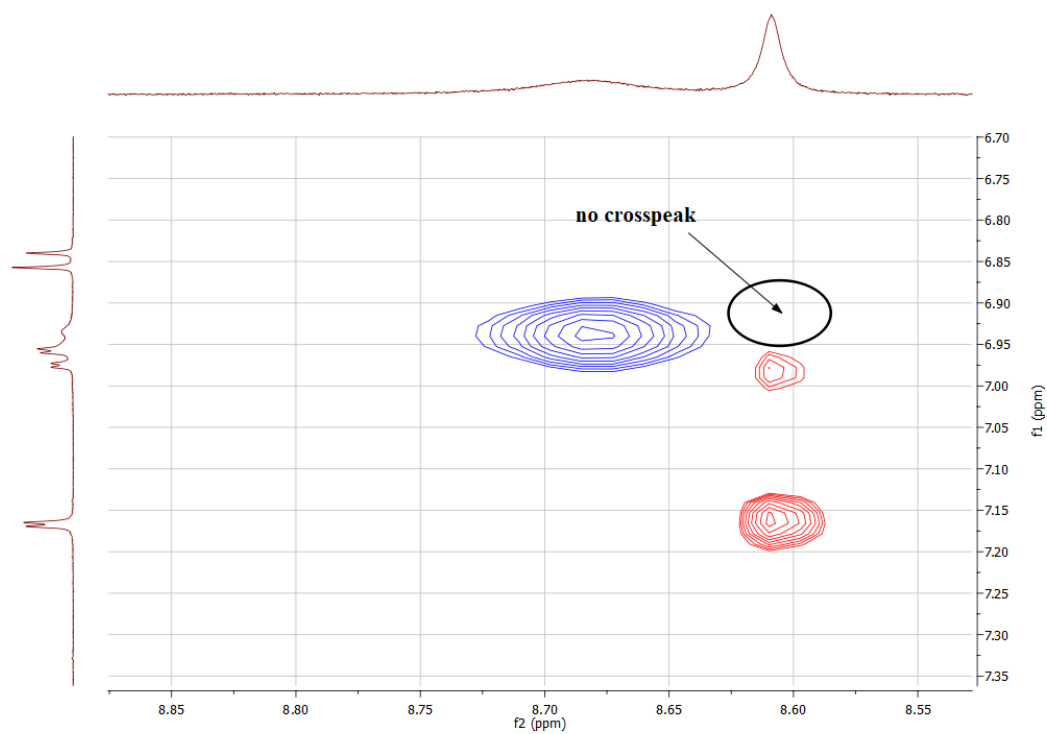

**Fig. S55c:** ROESY spectrum of **2** with 10 equivalents of TBACl in CD<sub>3</sub>CN (zoom).

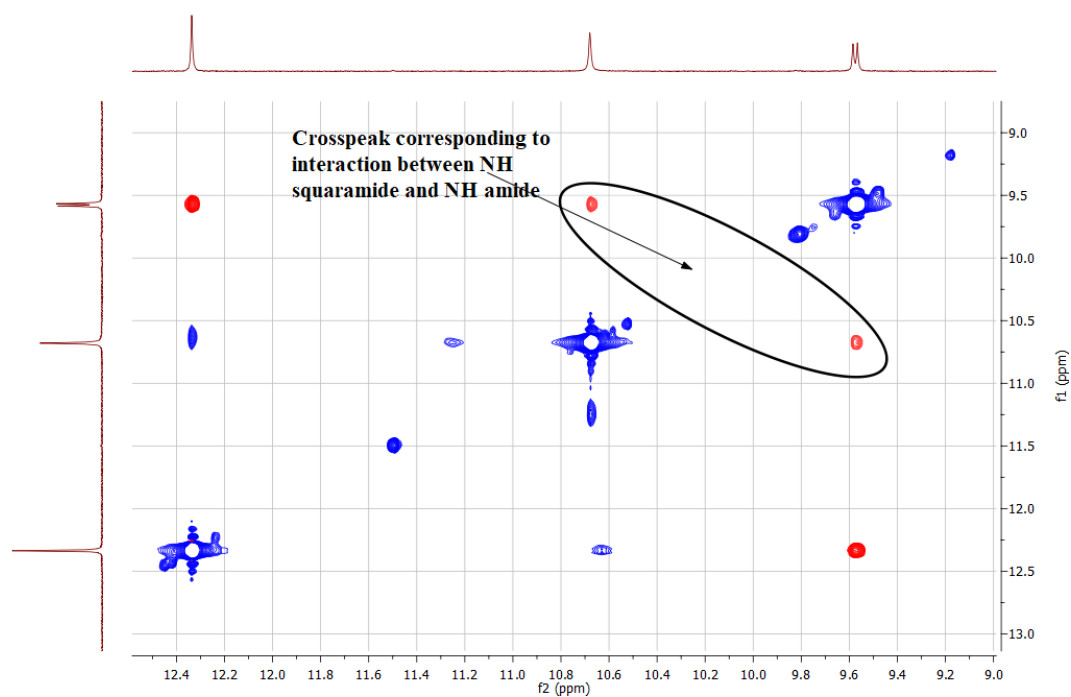

**Fig. S56:** COSY spectrum of **2** with 10 equivalents of TBACl in CD<sub>3</sub>CN.

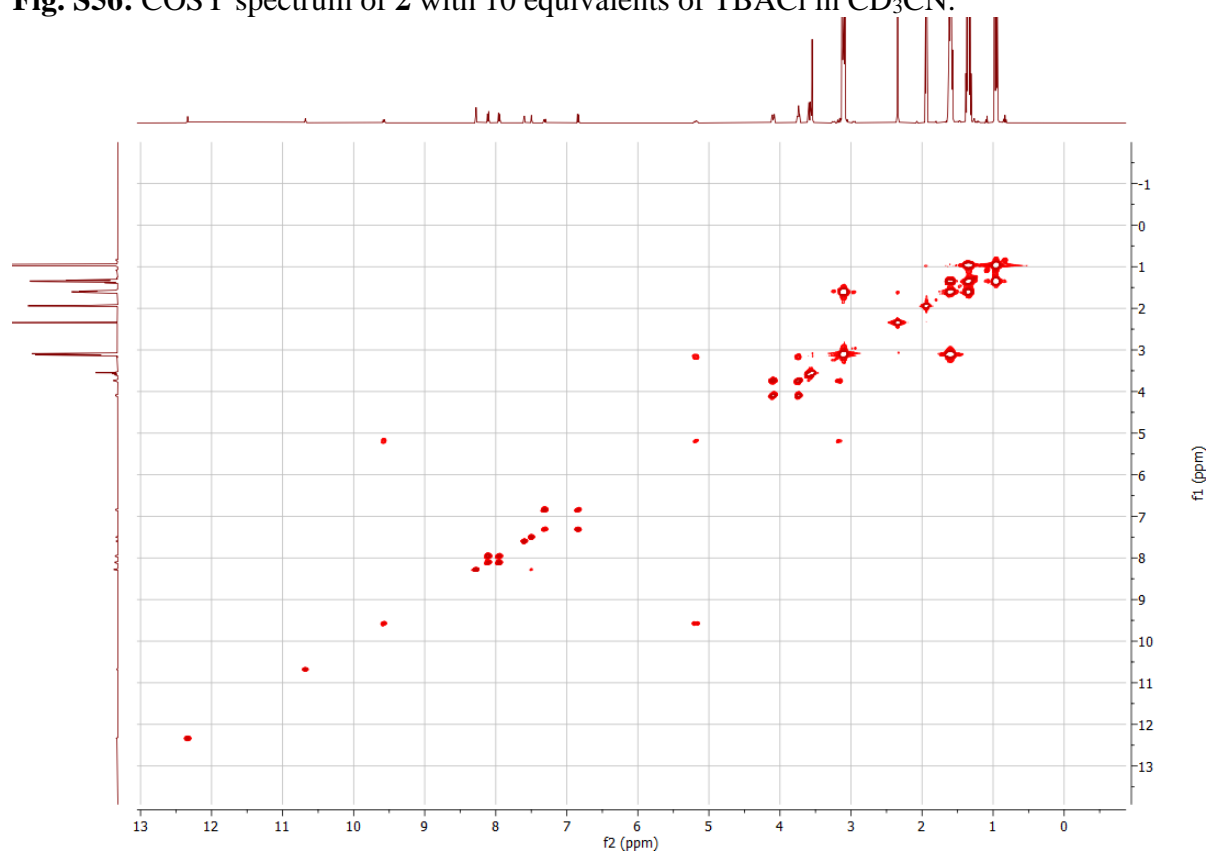



**Fig. S57:** HMBC spectrum of **2** with 10 equivalents of TBACl in CD<sub>3</sub>CN.

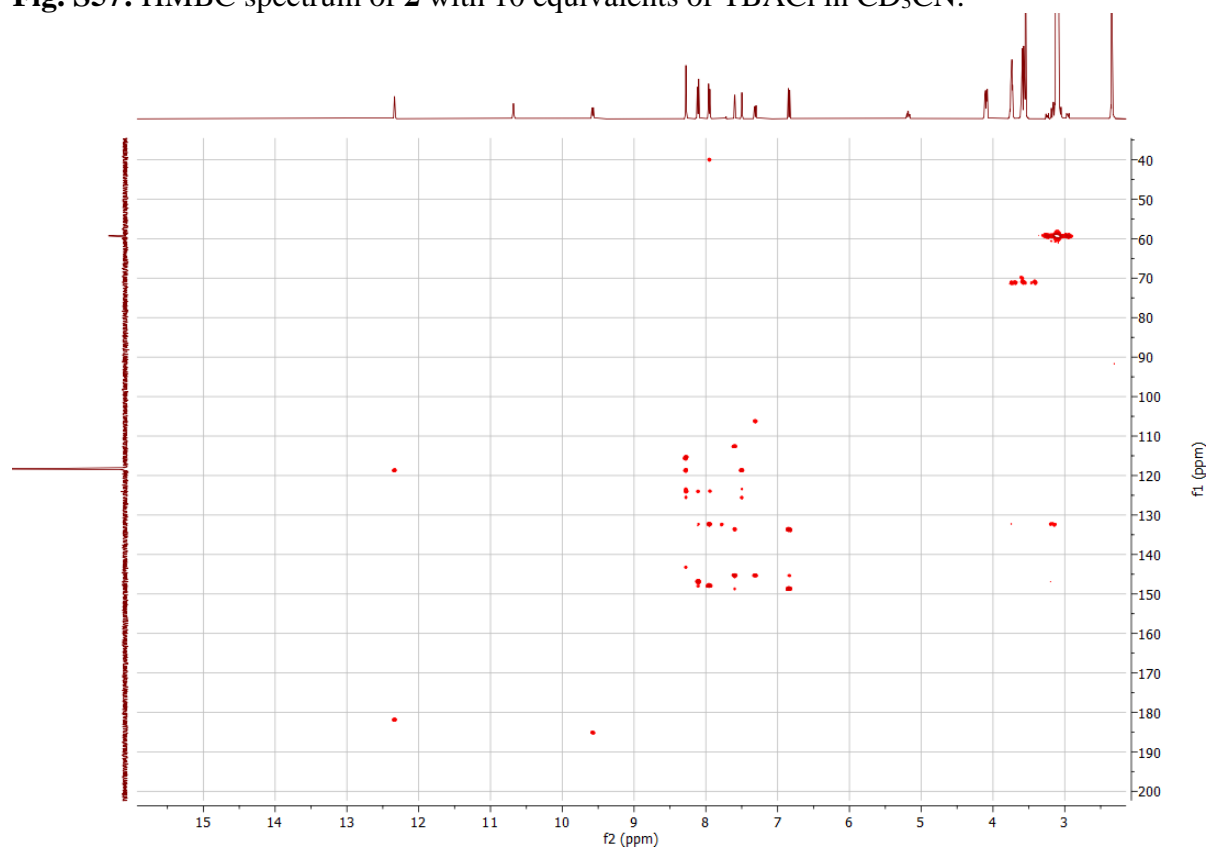

**Fig. S58:** HSQC spectrum of **2** with 10 equivalents of TBACl in CD<sub>3</sub>CN.

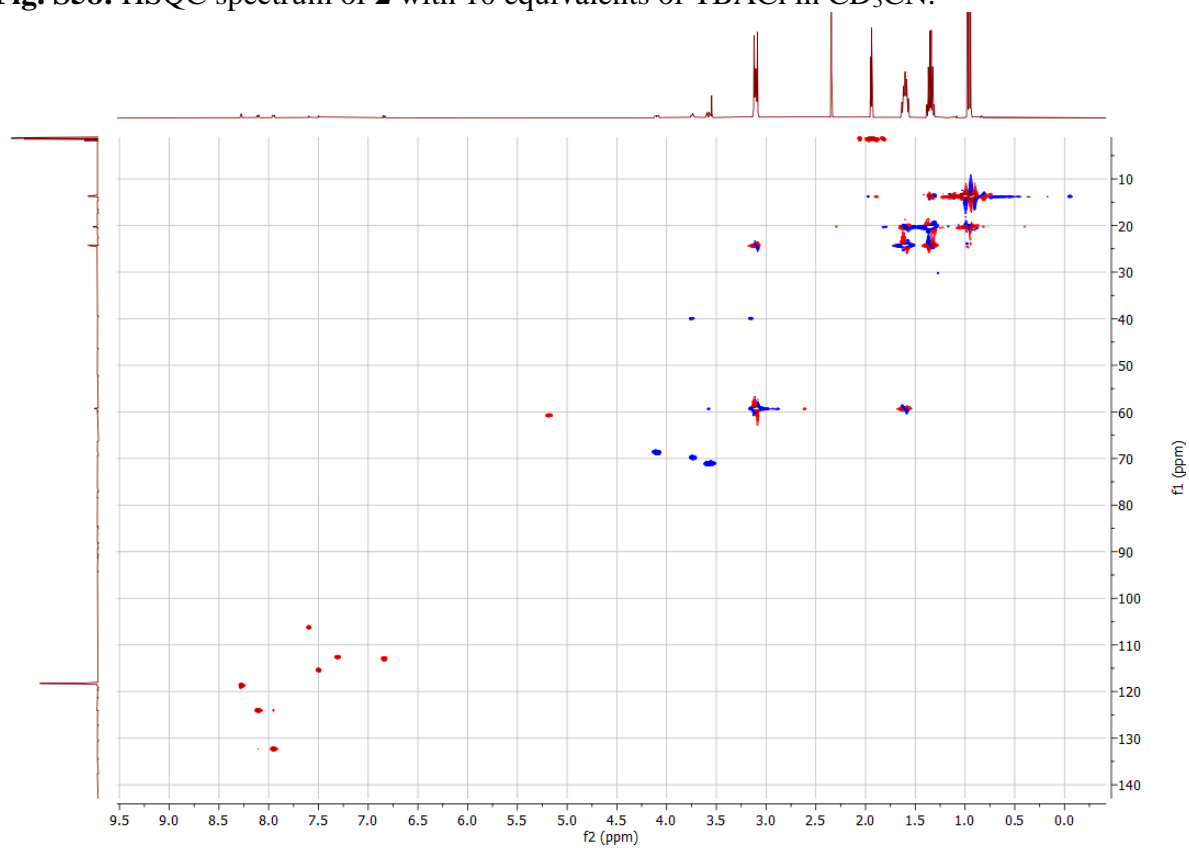

Fig. S59.  $^1\text{H}$  NMR spectra recorded upon titration of receptor **2** in  $\text{CD}_3\text{CN}$  with  $\text{TBA}_2\text{SO}_4$ .

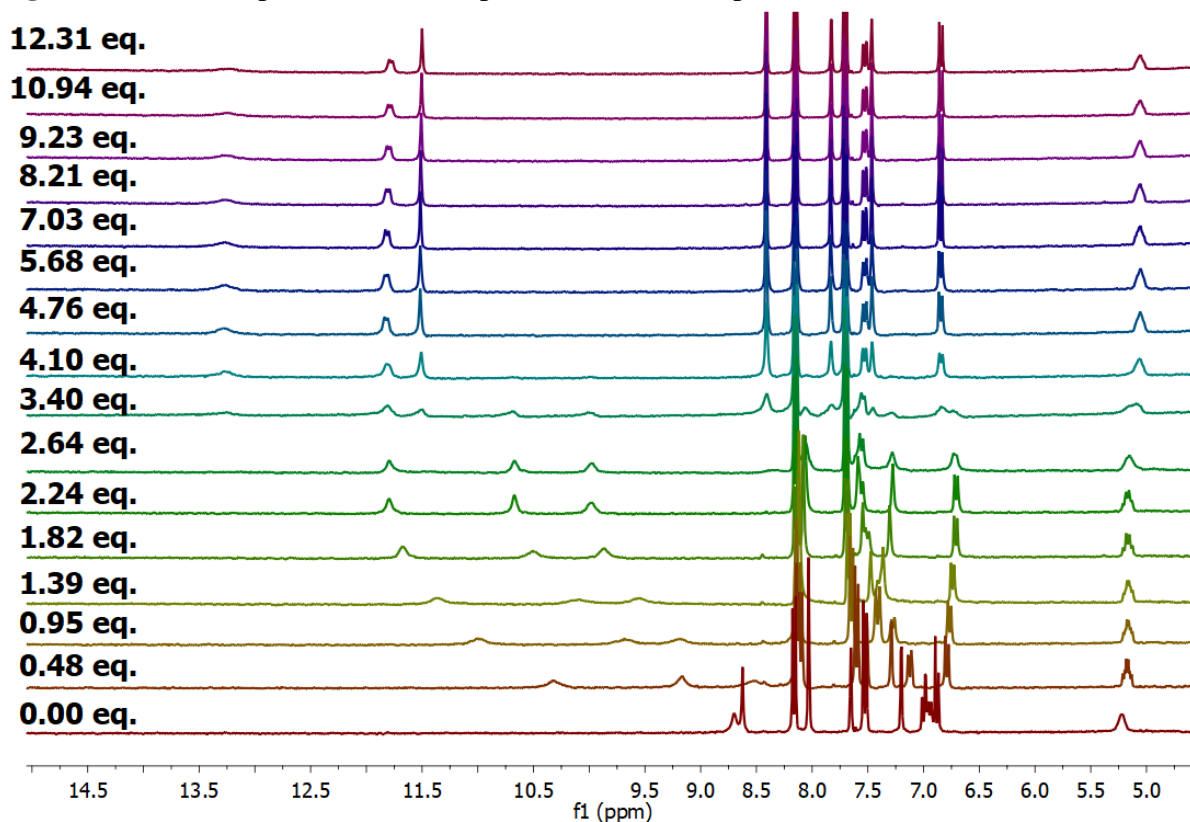

Fig. S60.  $^1\text{H}$  NMR spectra recorded upon titration of receptor **2** in  $\text{CD}_3\text{CN}$  with  $\text{TBA}_2\text{SO}_4$  in the presence of 1 eq.  $\text{KPF}_6$ .

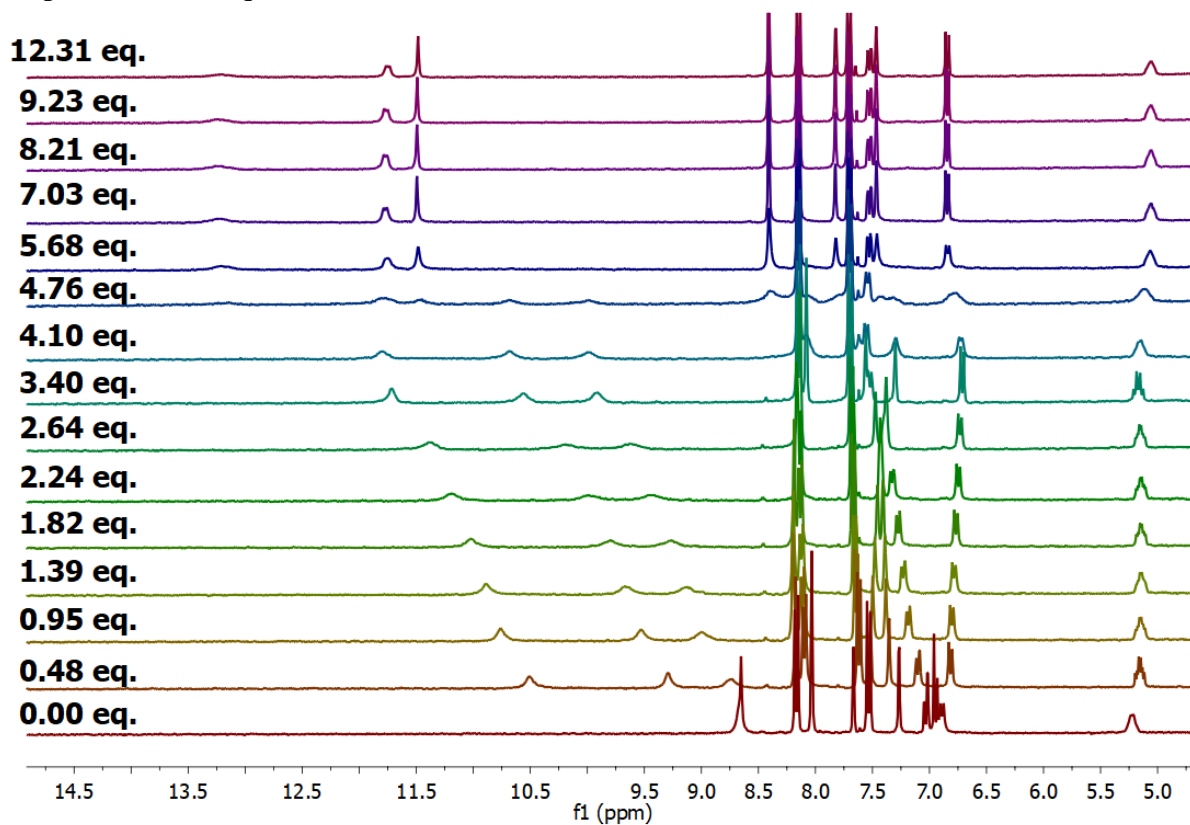

**Fig. S61:** ROESY spectrum of **2** with 2 equivalents of TBA<sub>2</sub>SO<sub>4</sub> in CD<sub>3</sub>CN.

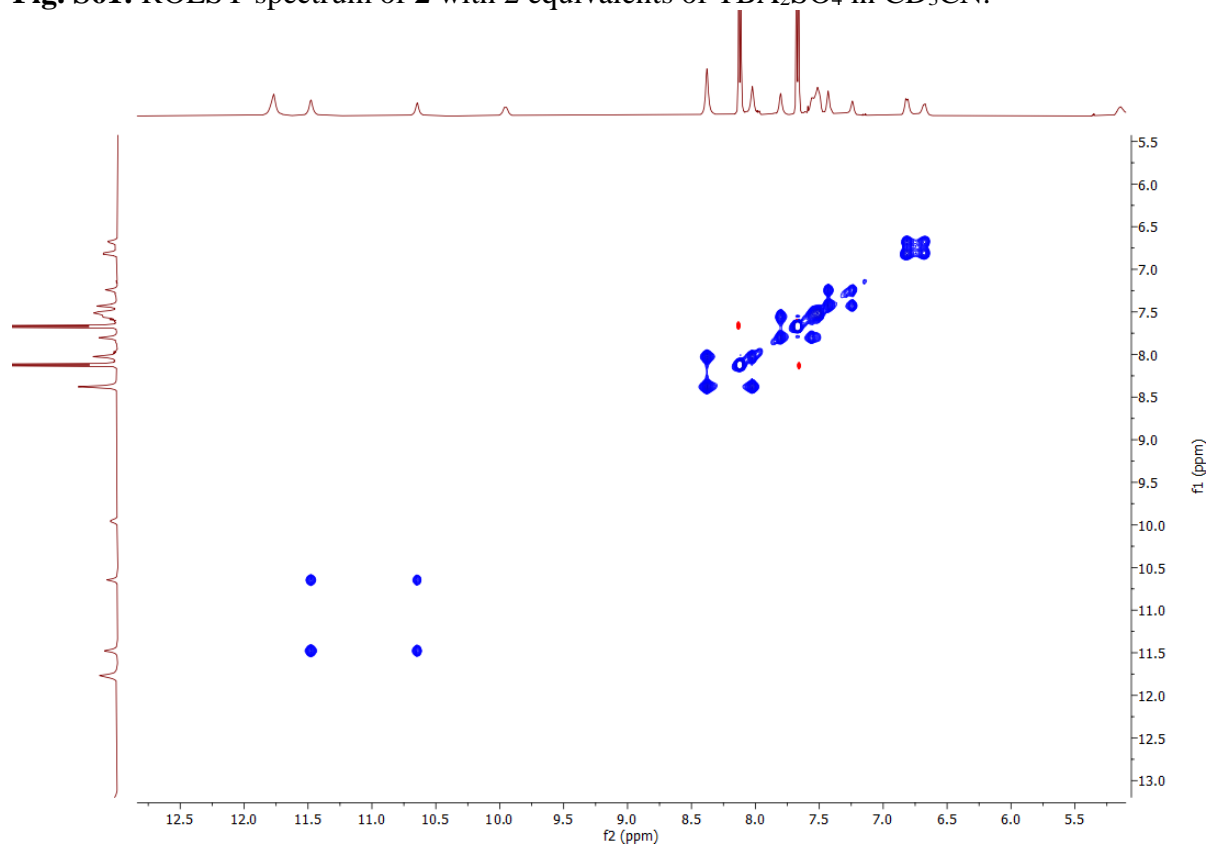

**Fig. S62:** COSY spectrum of **2** with 2 equivalents of TBA<sub>2</sub>SO<sub>4</sub> in CD<sub>3</sub>CN.

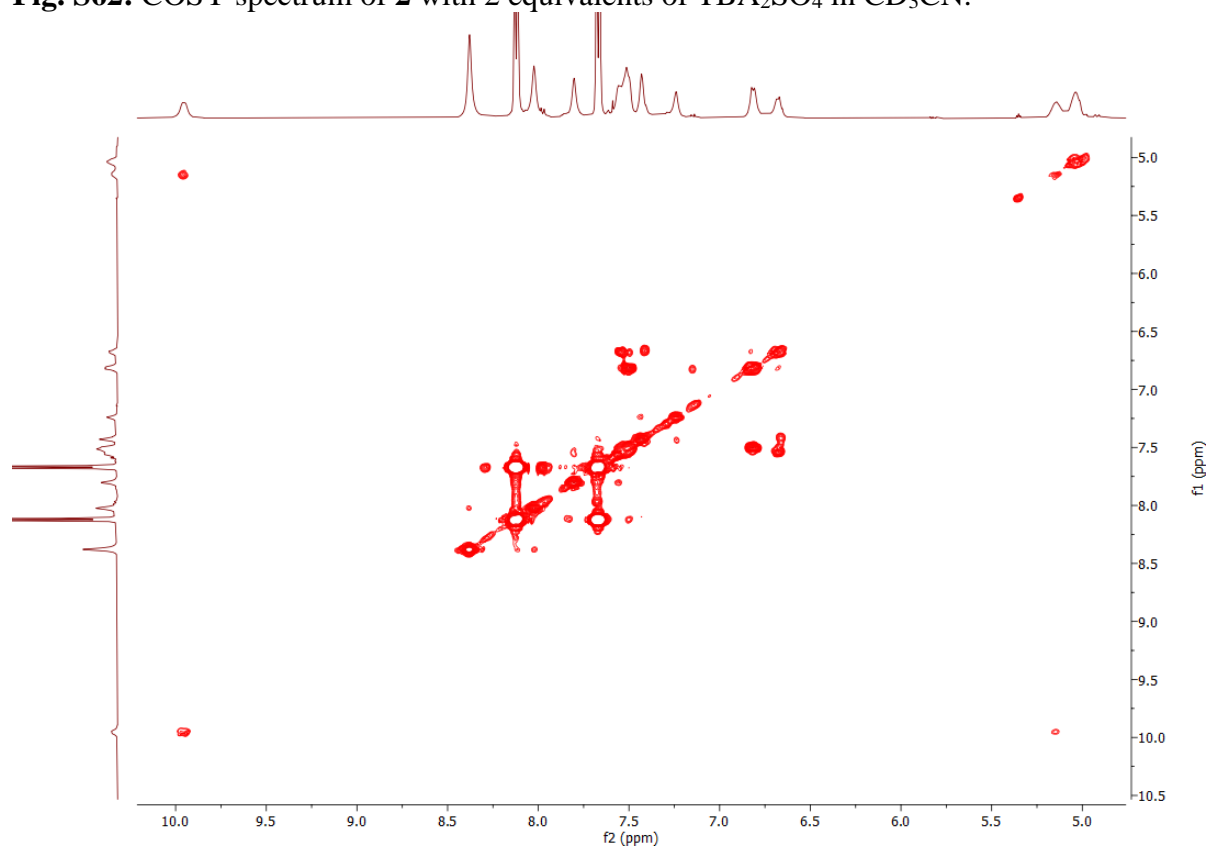

**Fig. S63:** HSQC spectrum of **2** with 2 equivalents of TBA<sub>2</sub>SO<sub>4</sub> in CD<sub>3</sub>CN.

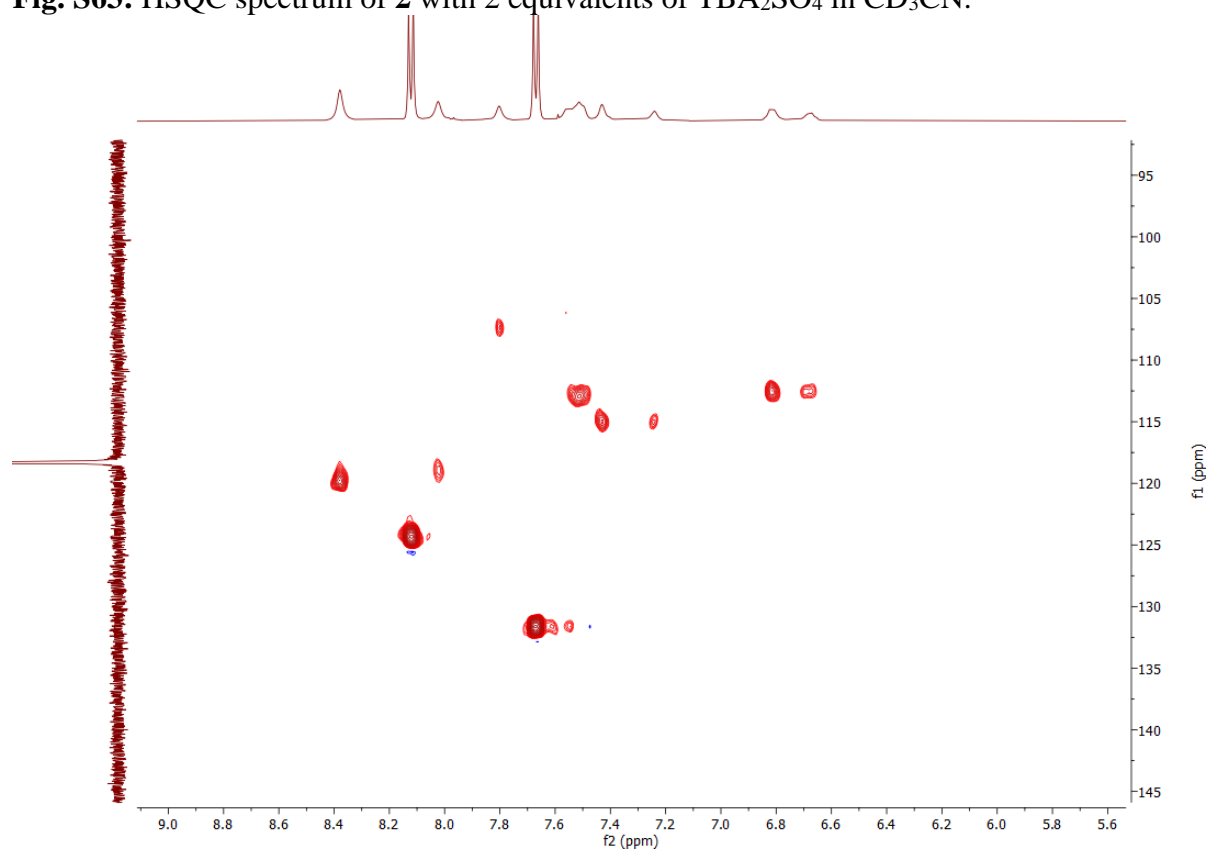

**Fig. S64:** HMBC spectrum of **2** with 2 equivalents of TBA<sub>2</sub>SO<sub>4</sub> in CD<sub>3</sub>CN.

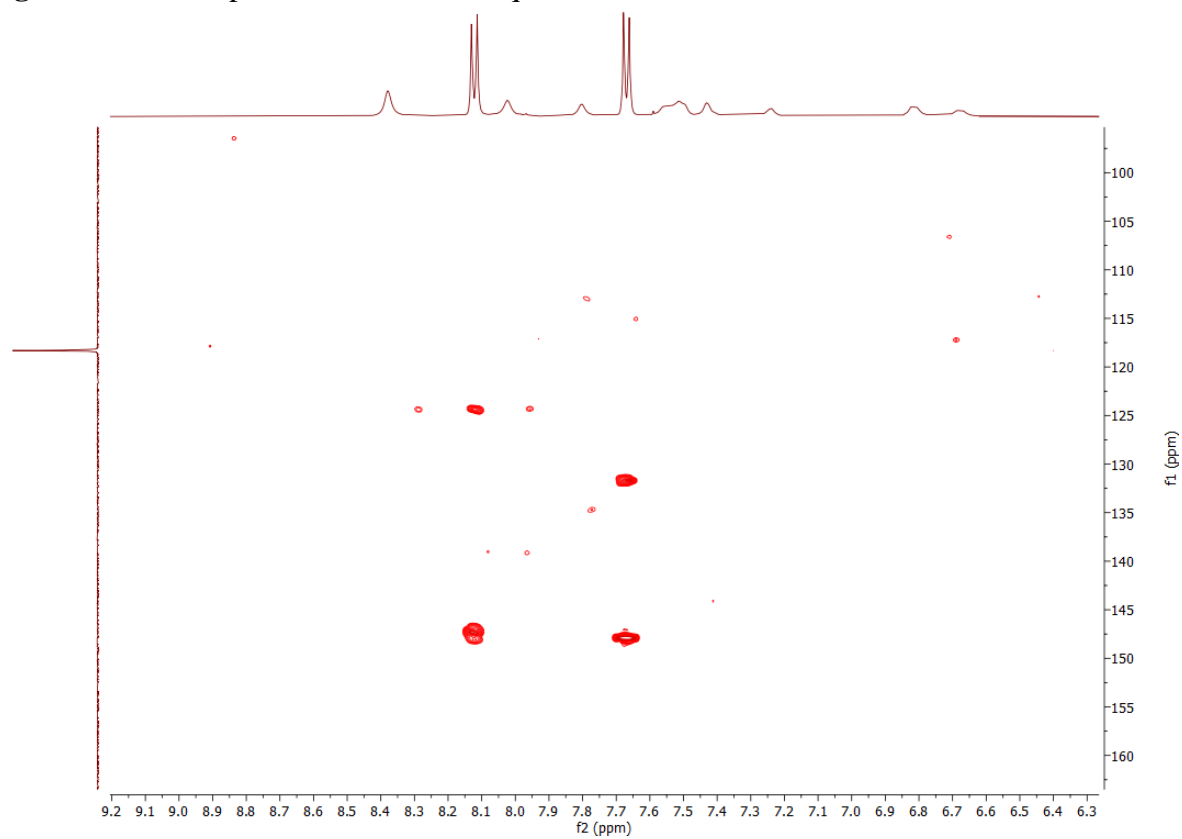

**Fig. S65:** TOCSY spectrum of **2** with 2 equivalents of TBA<sub>2</sub>SO<sub>4</sub> in CD<sub>3</sub>CN

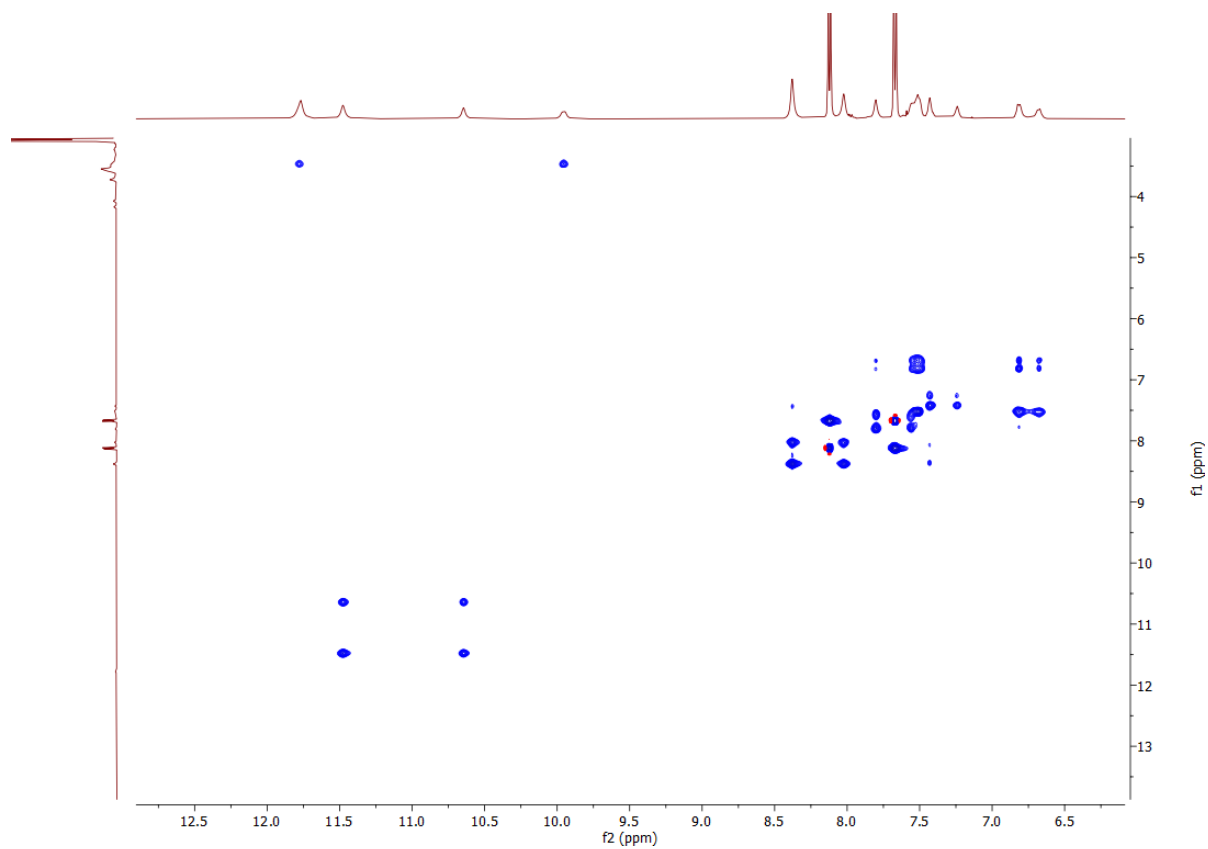

**Fig. S66:** COSY spectrum of **2** with 5 equivalents of TBA<sub>2</sub>SO<sub>4</sub> in CD<sub>3</sub>CN

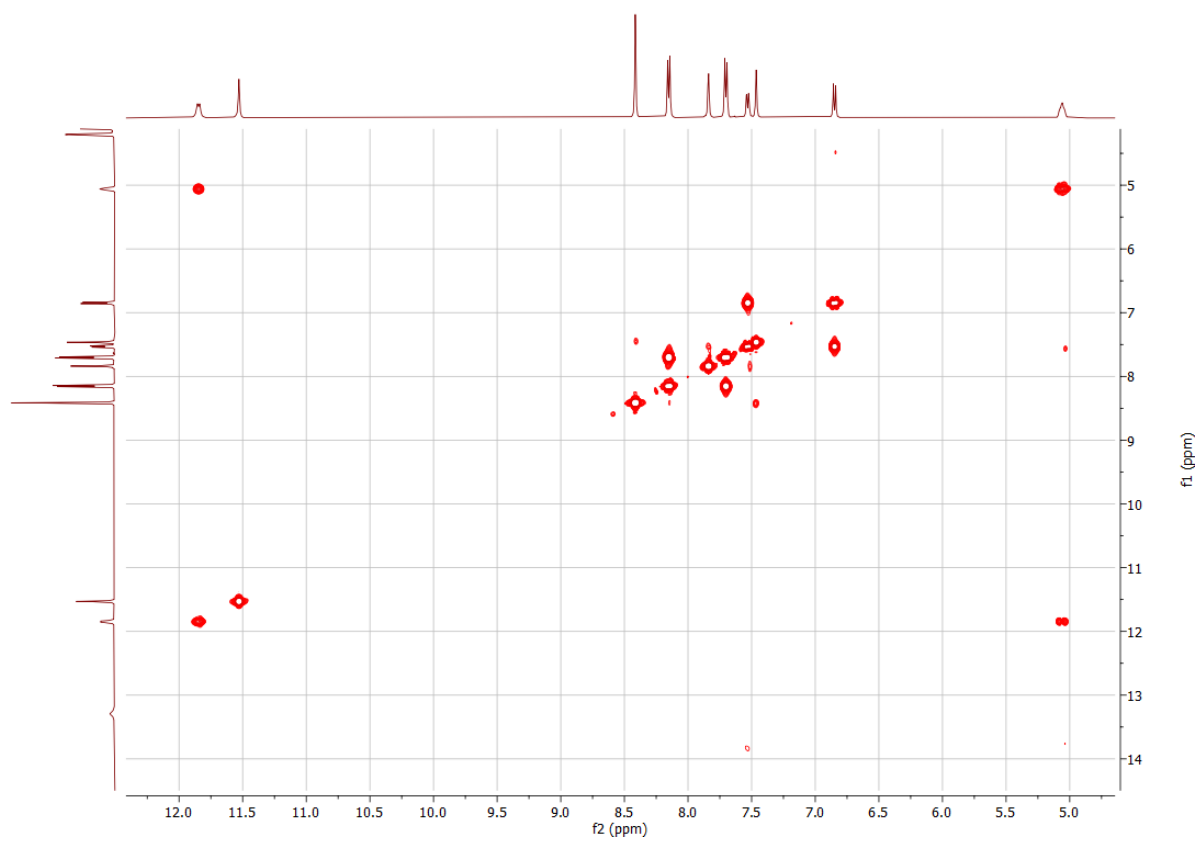

**Fig. S67:** HSQC spectrum of **2** with 5 equivalents of TBA<sub>2</sub>SO<sub>4</sub> in CD<sub>3</sub>CN.

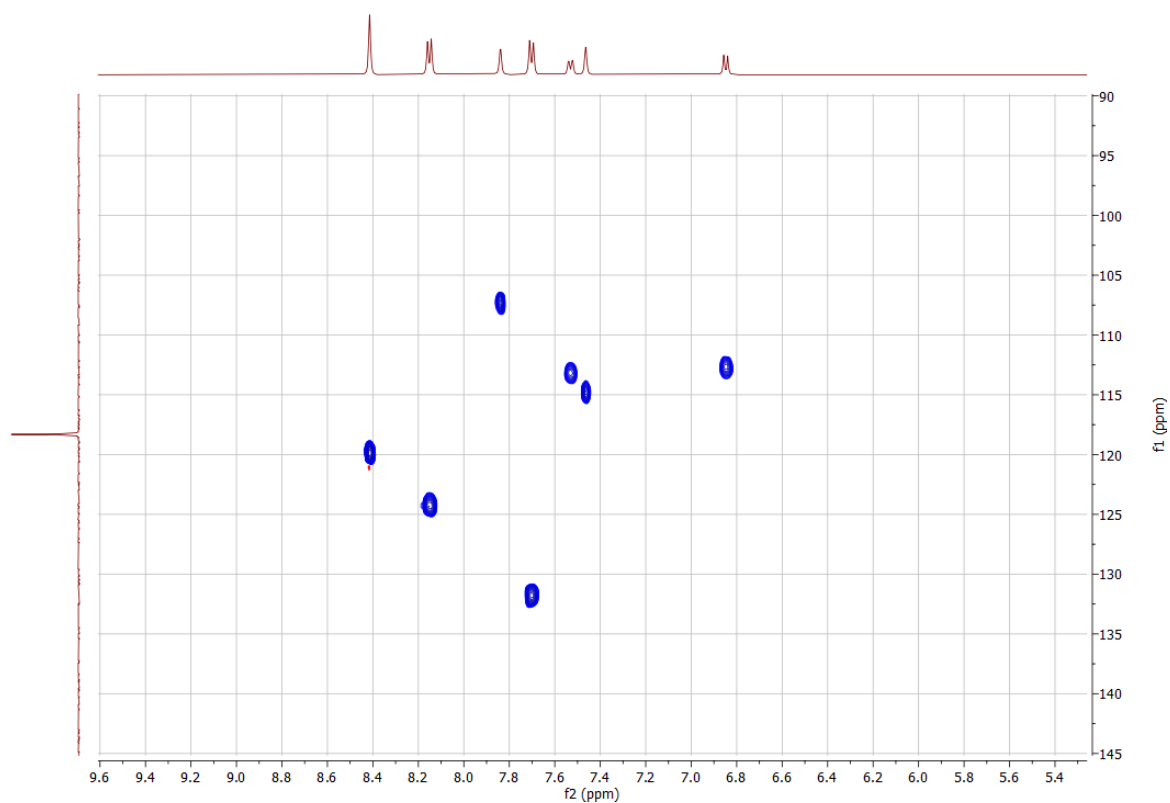

**Fig. S68:** HMBC spectrum of **2** with 5 equivalents of TBA<sub>2</sub>SO<sub>4</sub> in CD<sub>3</sub>CN.

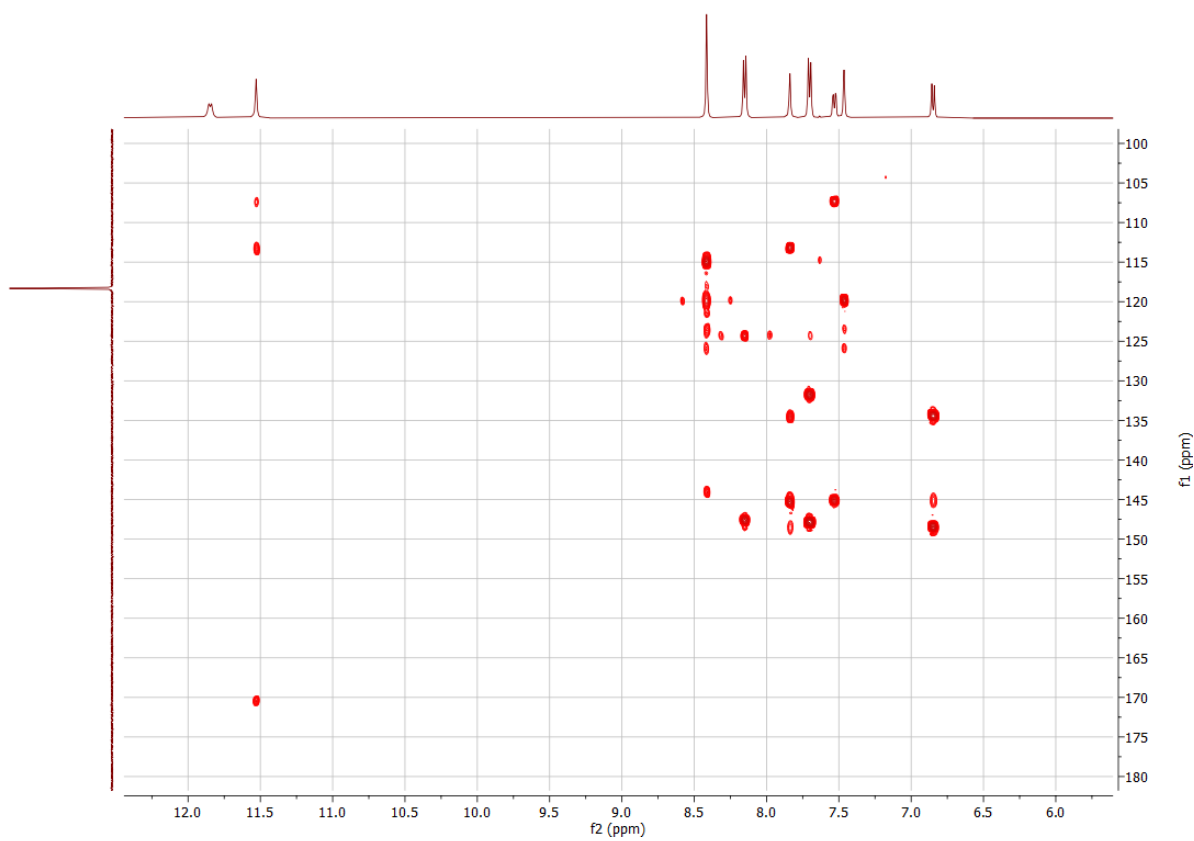

**Fig. S69:** ROESY spectrum of **2** with 5 equivalents of TBA<sub>2</sub>SO<sub>4</sub> in CD<sub>3</sub>CN.

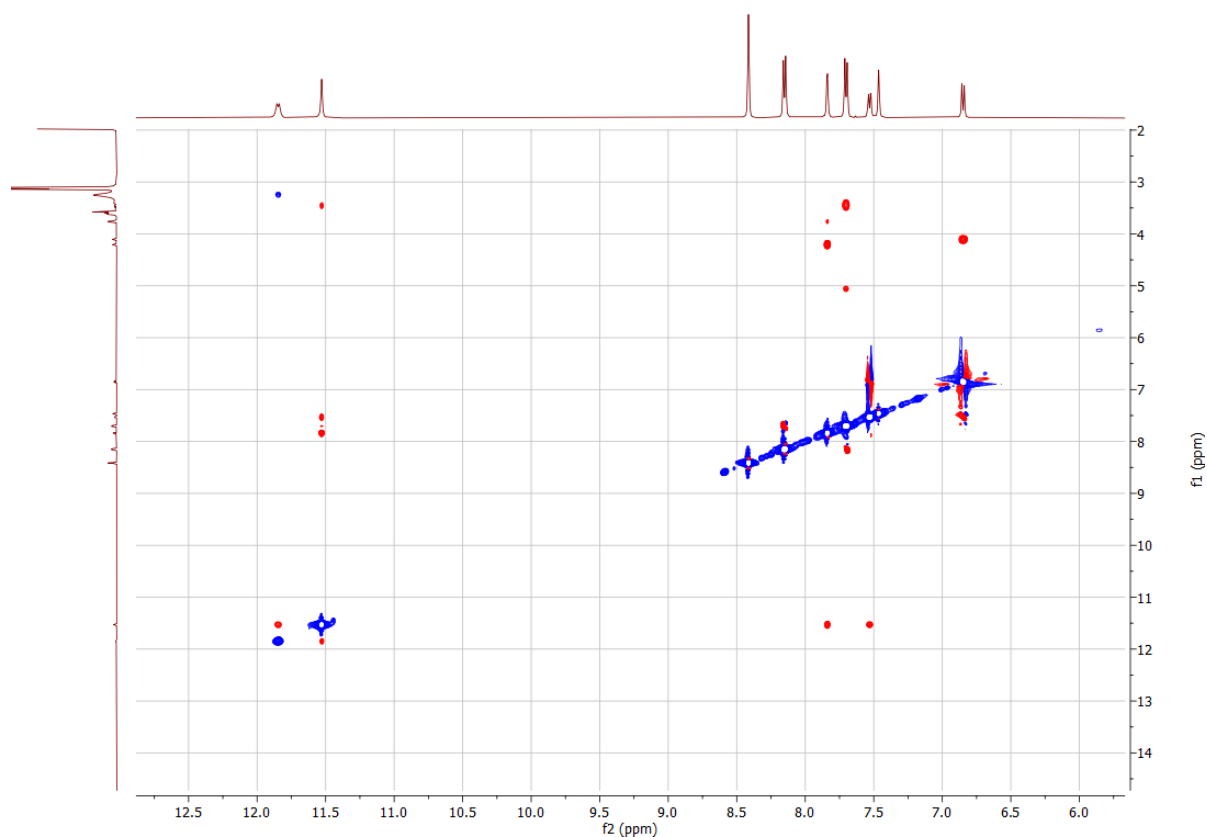

**Fig. S70.** Partial <sup>1</sup>H NMR spectra of a 3 mM solution receptor **2** in CDCl<sub>3</sub> after contacting with : (a) water, and aqueous 0.5 M solutions of (b) NaCl, (c) NaBr, (d) NaNO<sub>3</sub>, (e) NaNO<sub>2</sub>, (f) Na<sub>2</sub>SO<sub>4</sub>, (g) NaH<sub>2</sub>PO<sub>4</sub>.

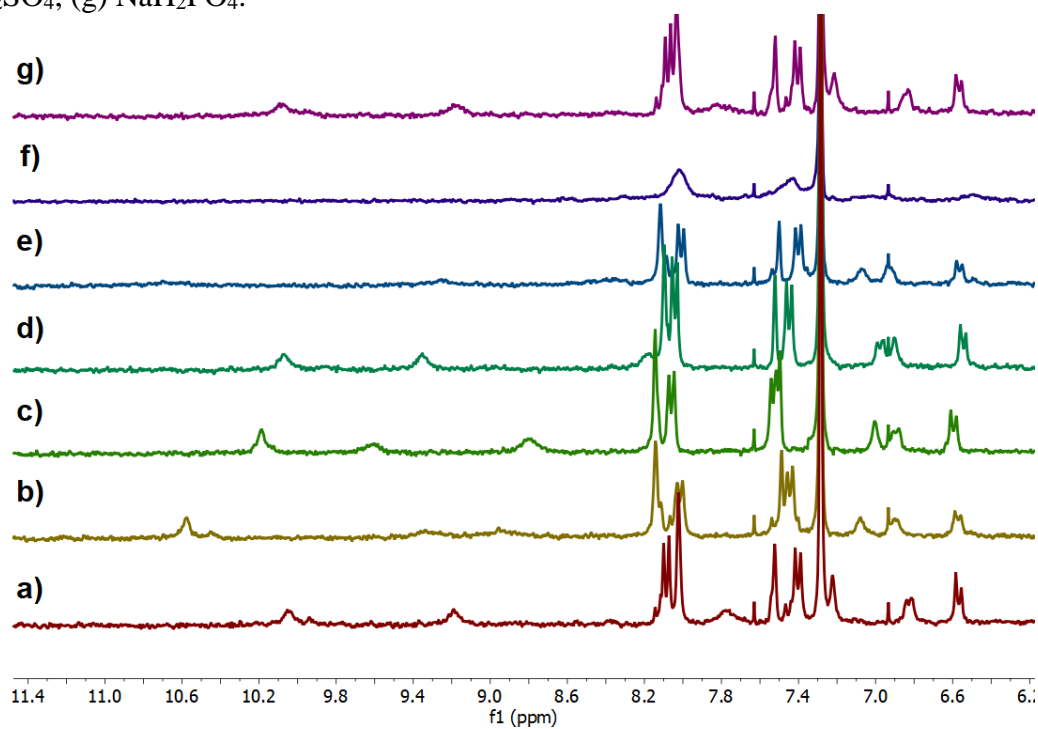

### EXTRACTION EXPERIMENTS - ION CHROMATOGRAPHY

A solution of receptors **1**, **2** in chloroform (2 ml, ca. 5 mM or 20 mM) was intensive shaking with 5 mM aqueous solutions of suitable salts (2 ml) or mixture of salts for 5 minutes. Then 1 mL of aqueous phase was taken and tenfold diluted. The concentration of chloride, bromide, nitrite, nitrate, phosphate and sulfate anions in aqueous phase was determined by high performance ion chromatography (HPIC).

**Fig. S71.** Chromatograms obtained during extraction experiments after tenfold dilution (a) 5 Mm source phase aqueous solution of sodium salts of: NaCl, NaBr, NaNO<sub>2</sub>, NaNO<sub>3</sub>, NaH<sub>2</sub>PO<sub>4</sub>, Na<sub>2</sub>SO<sub>4</sub> solution (b) after extraction with 5 mM of **1** in CHCl<sub>3</sub>.

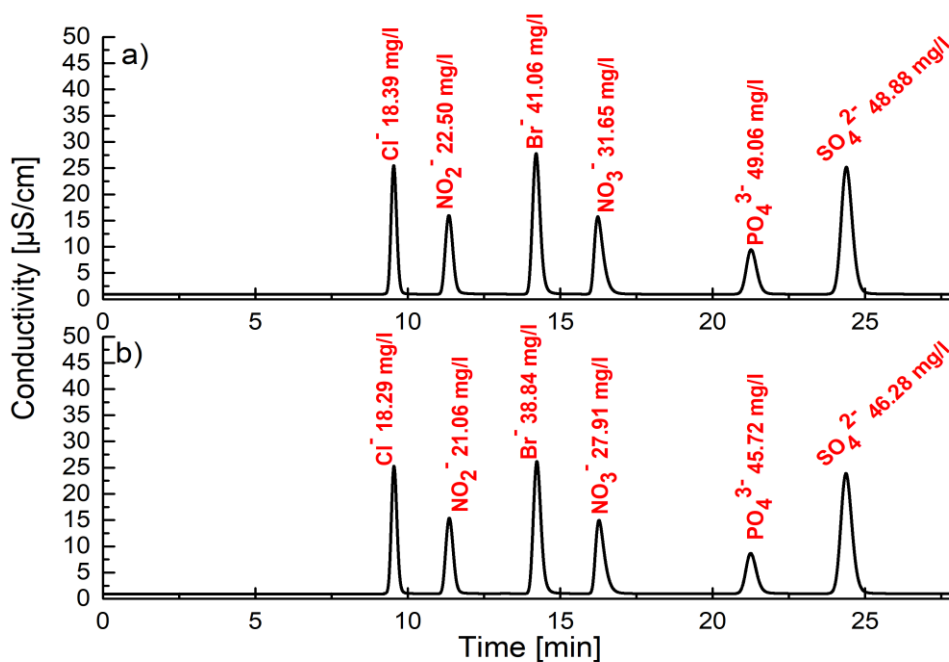



**Fig. S72.** Chromatograms obtained during extraction experiments after tenfold dilution (a) 5 Mm source phase aqueous solution of sodium salts of: NaCl, NaBr, NaNO<sub>2</sub>, NaNO<sub>3</sub>, NaH<sub>2</sub>PO<sub>4</sub>, Na<sub>2</sub>SO<sub>4</sub> solution (b) after extraction with 5 mM of **2** in CHCl<sub>3</sub>.

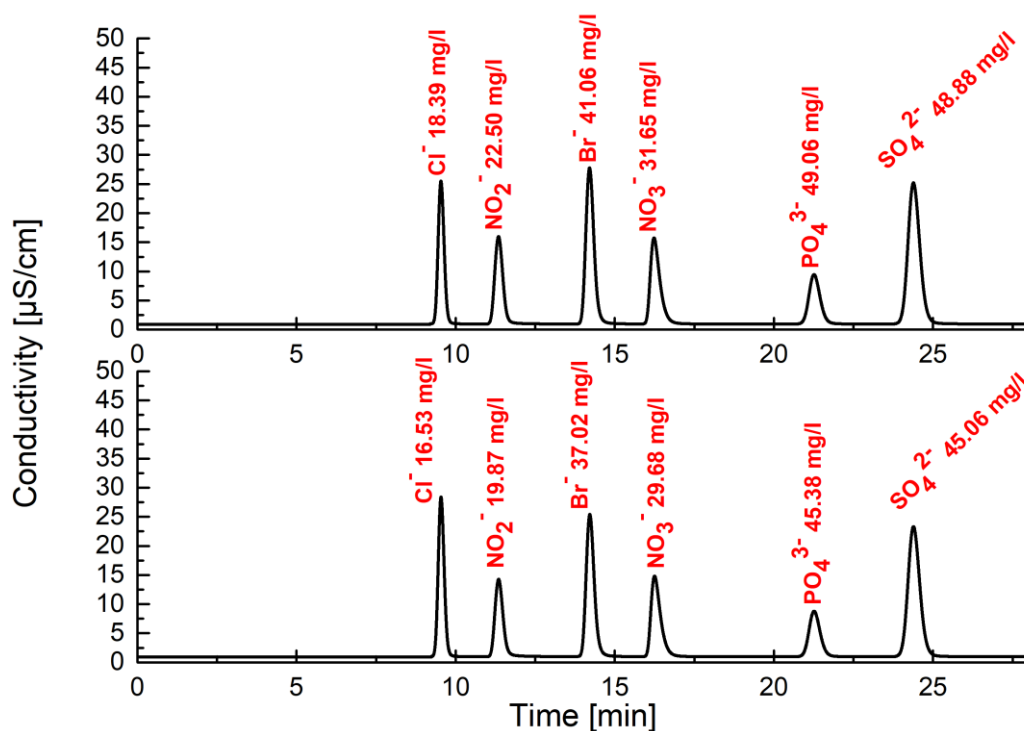

**Fig. S73.** Chromatograms obtained during extraction experiments after tenfold dilution (a) source phase: 5 Mm KCl solution (b) after extraction with 5 mM of **2** in CHCl<sub>3</sub>.

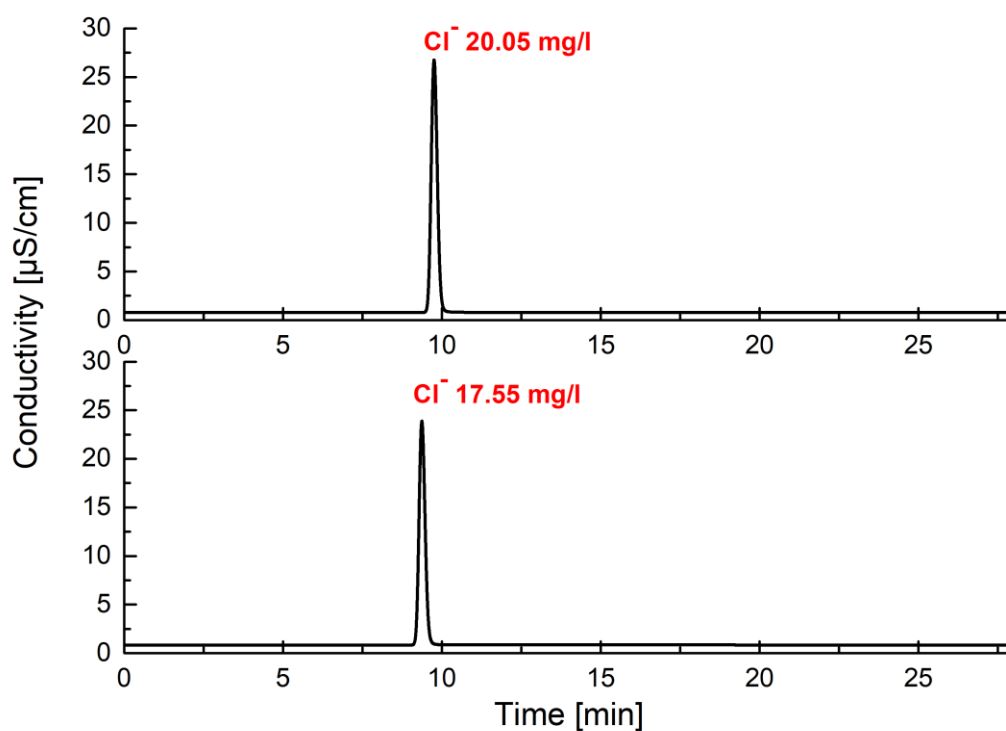

**Fig. S74.** Chromatograms obtained during extraction experiments after tenfold dilution (a) source phase: 5 Mm KBr solution (b) after extraction with 5 mM of **2** in CHCl<sub>3</sub>.

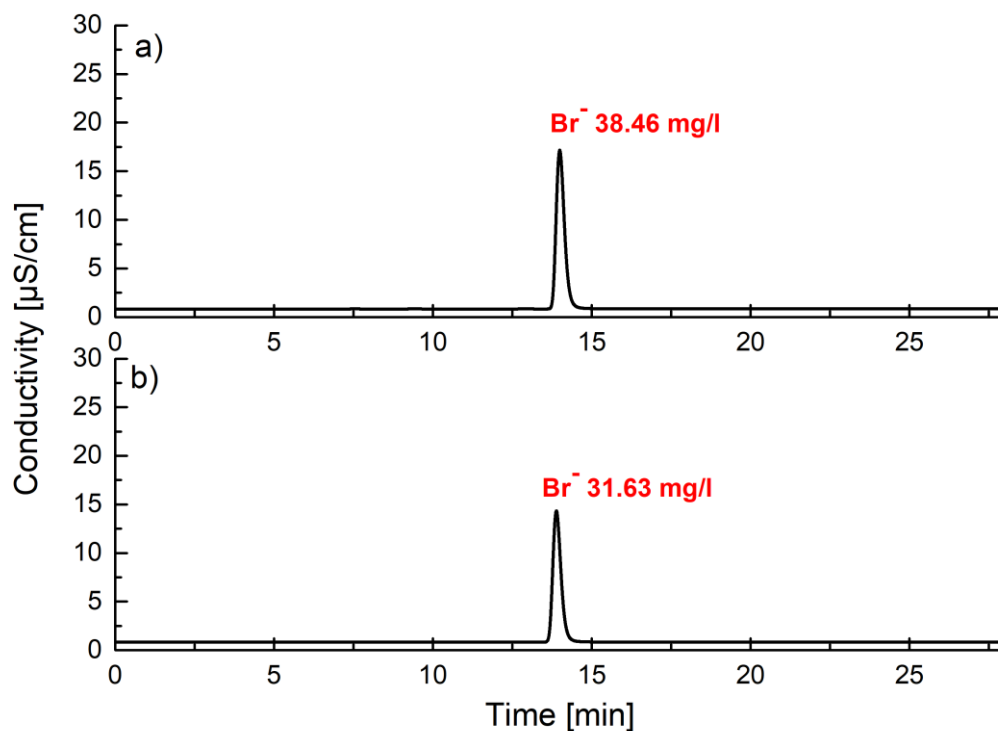

**Fig. S75.** Chromatograms obtained during extraction experiments after tenfold dilution (a) source phase: 5 Mm KNO<sub>2</sub> solution (b) after extraction with 5 mM of **2** in CHCl<sub>3</sub>.

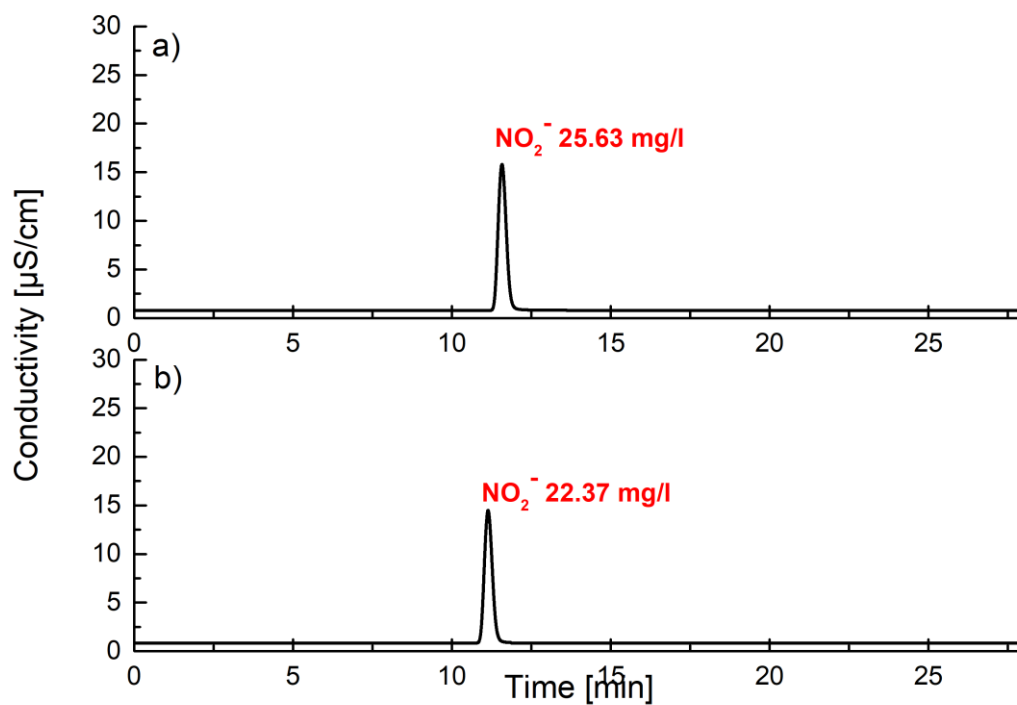

**Fig. S76.** Chromatograms obtained during extraction experiments after tenfold dilution (a) source phase: 5 Mm KNO<sub>3</sub> solution (b) after extraction with 5 mM of **2** in CHCl<sub>3</sub>.

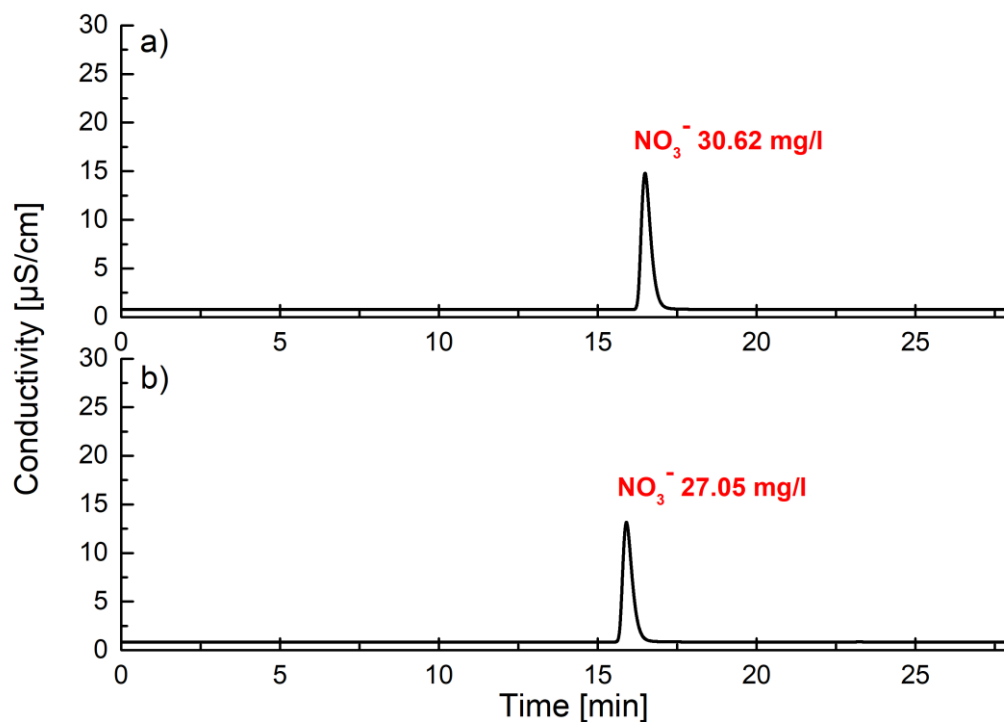

**Fig. S77.** Chromatograms obtained during extraction experiments after tenfold dilution (a) source phase: 5 Mm KH<sub>2</sub>PO<sub>4</sub> solution (b) after extraction with 5 mM of **2** in CHCl<sub>3</sub>.

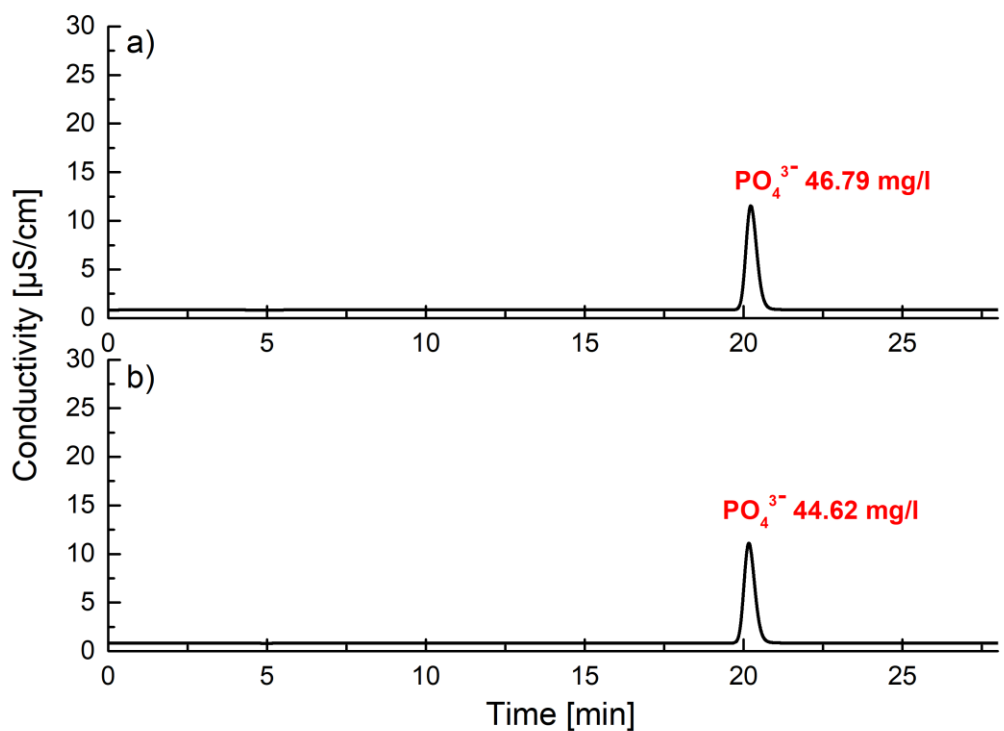

**Fig. S78.** Chromatograms obtained during extraction experiments after tenfold dilution (a) source phase: 5 Mm  $\text{K}_2\text{SO}_4$  solution (b) after extraction with 5 mM of **2** in  $\text{CHCl}_3$ .

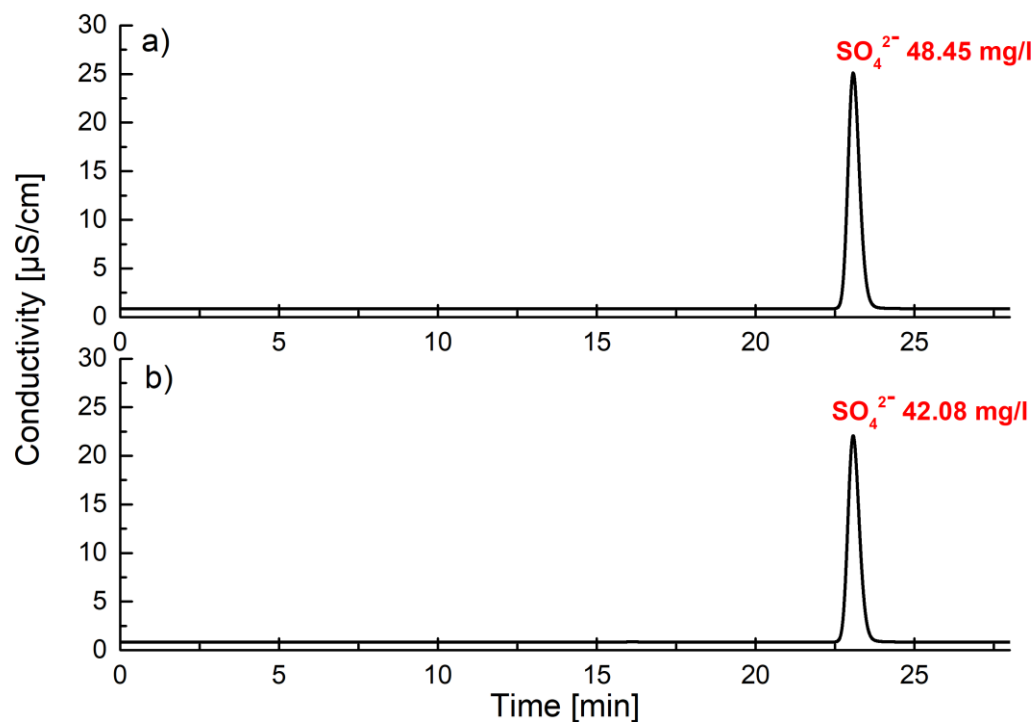

**Fig. S79.** Chromatograms obtained during extraction experiments after tenfold dilution (a) source phase: 5 Mm  $\text{K}_2\text{SO}_4$  solution (b) after extraction with 20 mM of **2** in  $\text{CHCl}_3$ .

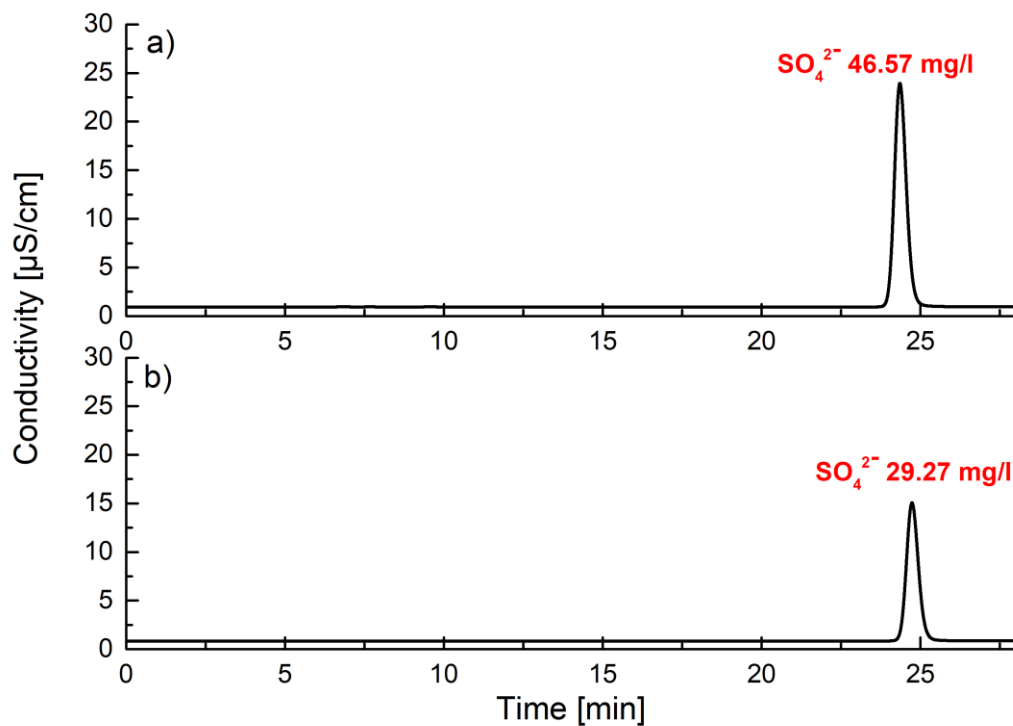

## TRANSPORT ACROSS MEMBRANE

**Fig. S80.** Sulfates transport by **2** across a bulk chloroform membrane determined by the chloride concentration in the receiving phase. Source phase: 50 mM solution of TBA<sub>2</sub>SO<sub>4</sub>, K<sub>2</sub>SO<sub>4</sub> in water; organic phase: 5 mM **2** in CHCl<sub>3</sub>; receiving phase: water.

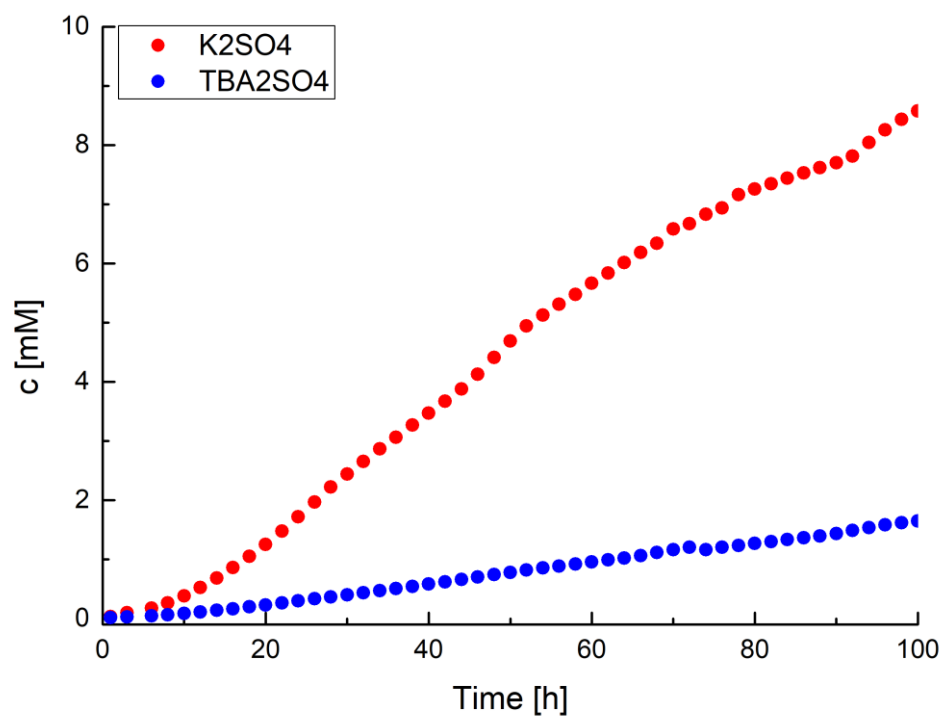

## NMR SPECTRA

**Fig. S81:**  $^1\text{H}$  NMR spectrum of **S1** in  $\text{CDCl}_3$ .

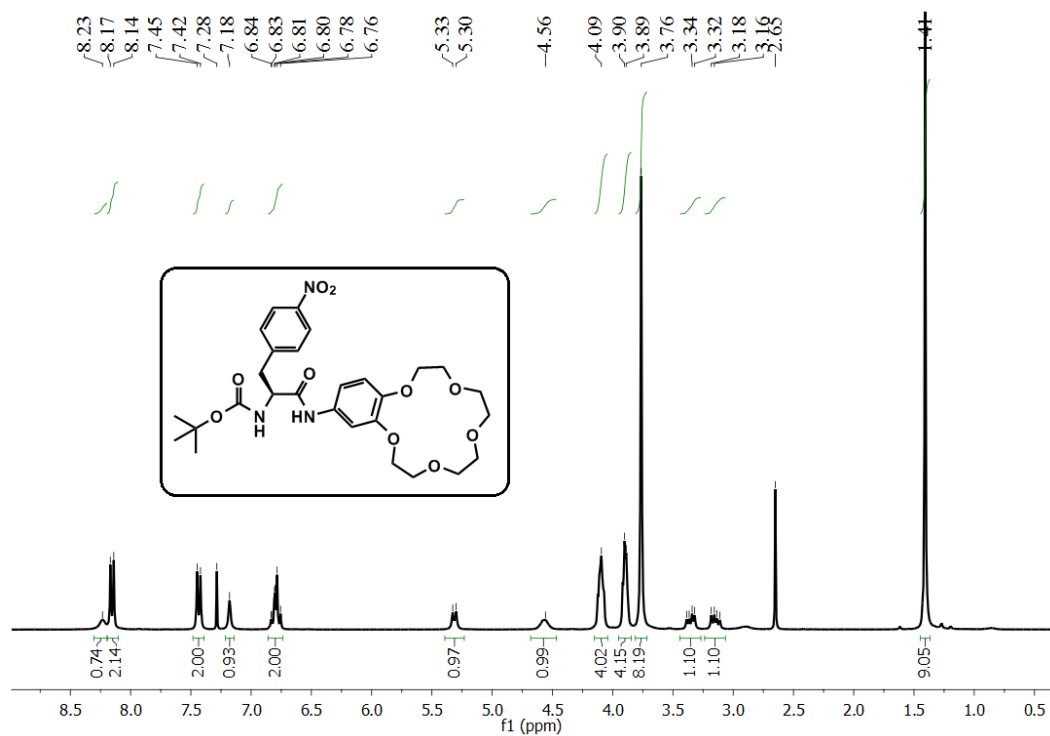

**Fig. S82:**  $^{13}\text{C}$  NMR spectrum of **S1** in  $\text{CDCl}_3$ .

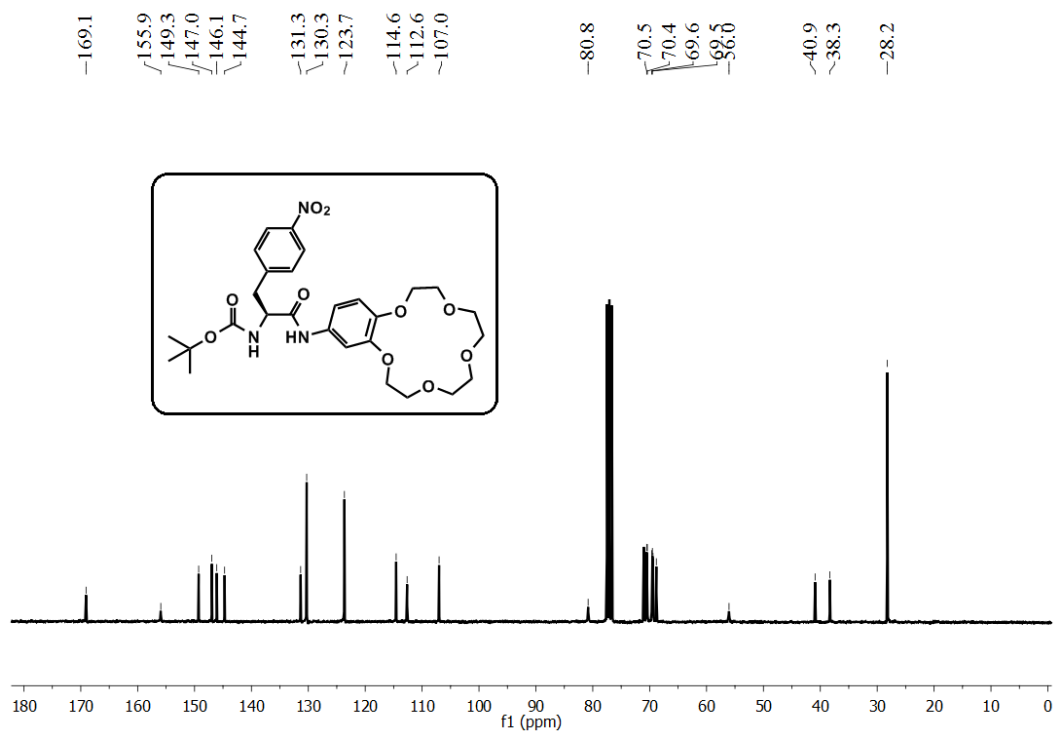

**Fig. S83:**  $^1\text{H}$  NMR spectrum of **1** in  $\text{DMSO}-d_6$ .

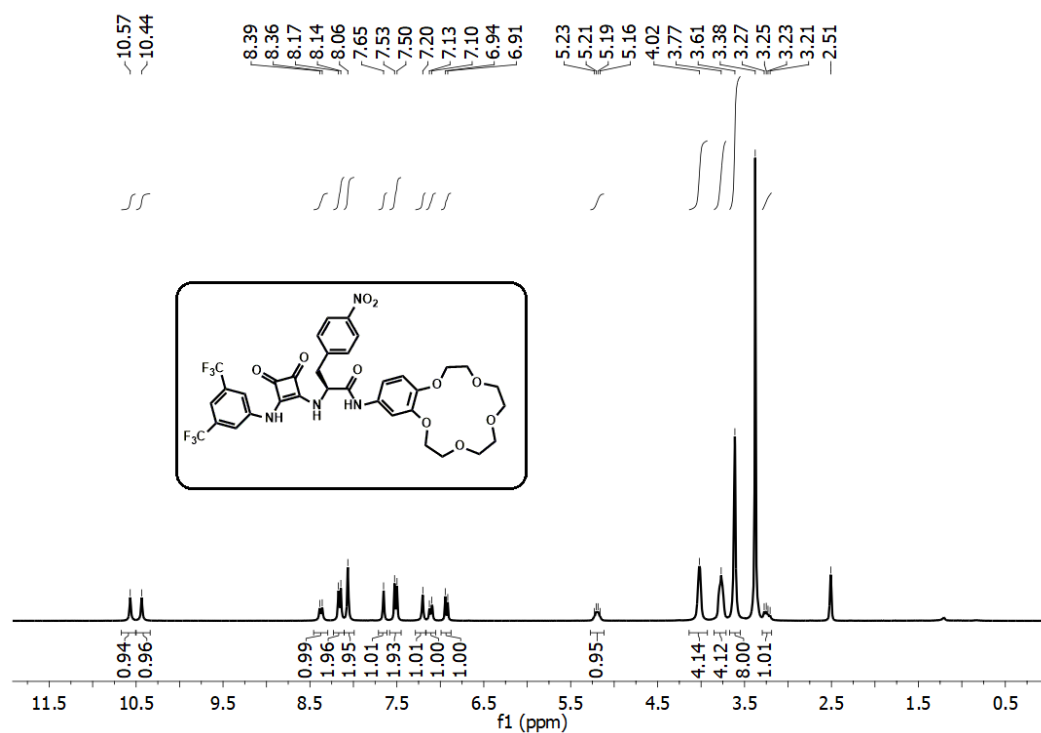

**Fig. S84:**  $^{13}\text{C}$  NMR spectrum of **1** in  $\text{DMSO}-d_6$ .

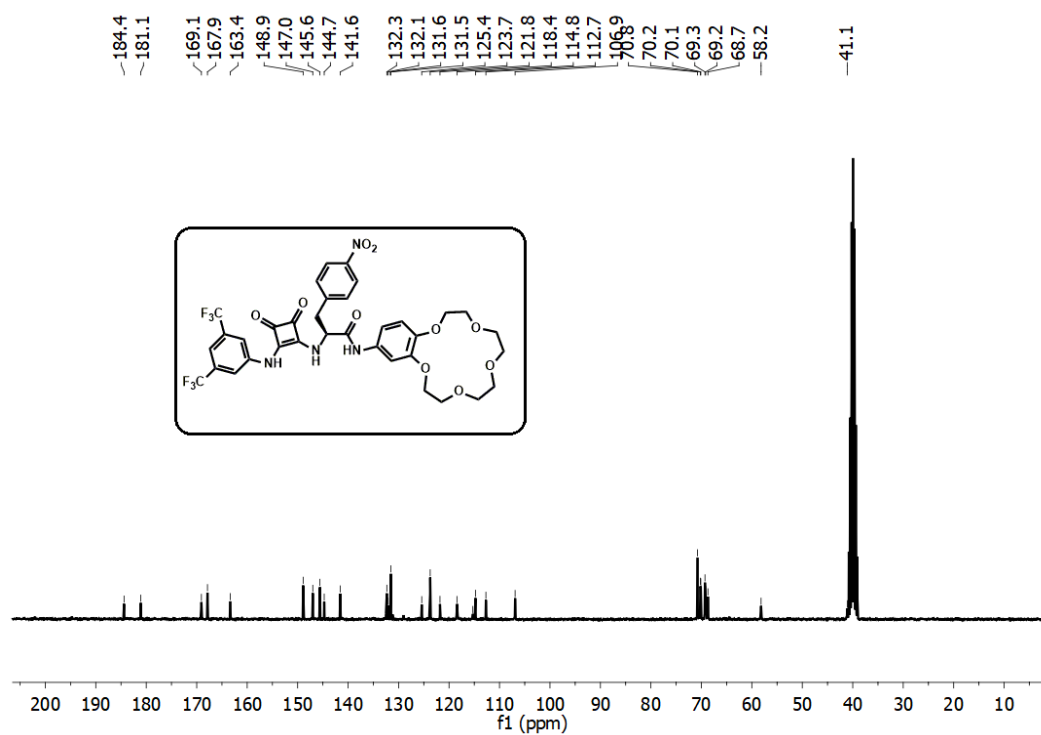

**Fig. S85:**  $^1\text{H}$  NMR spectrum of **S4** in  $\text{DMSO}-d_6$ .

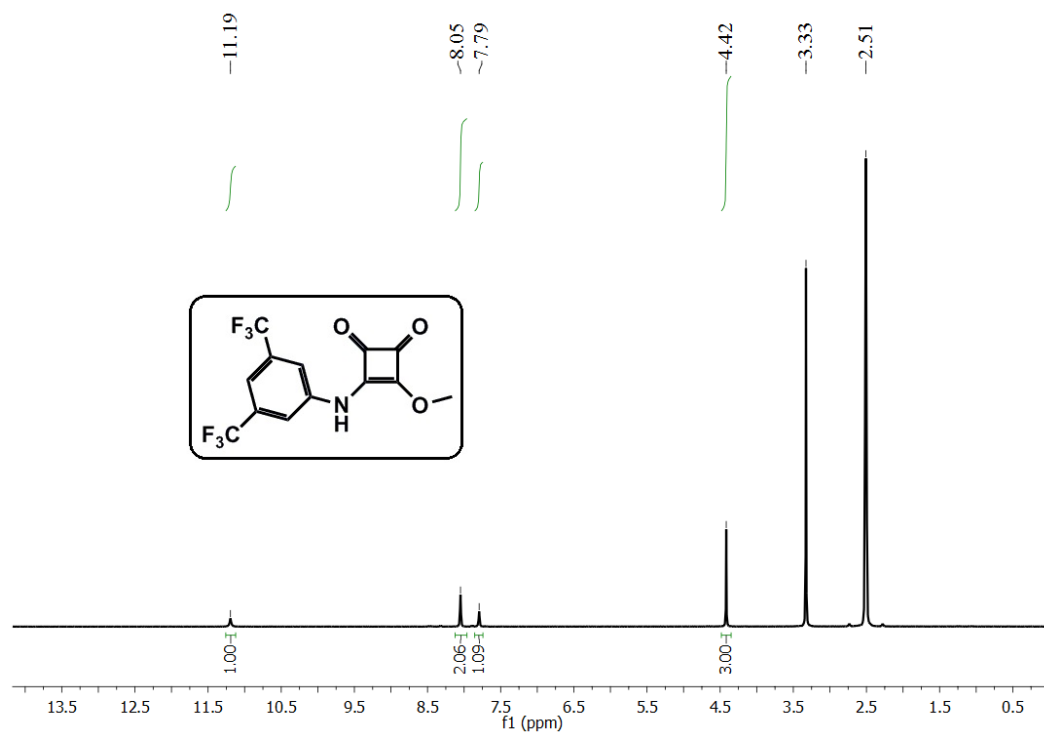

**Fig. S86:**  $^{13}\text{C}$  NMR spectrum of **S4** in  $\text{DMSO}-d_6$ .

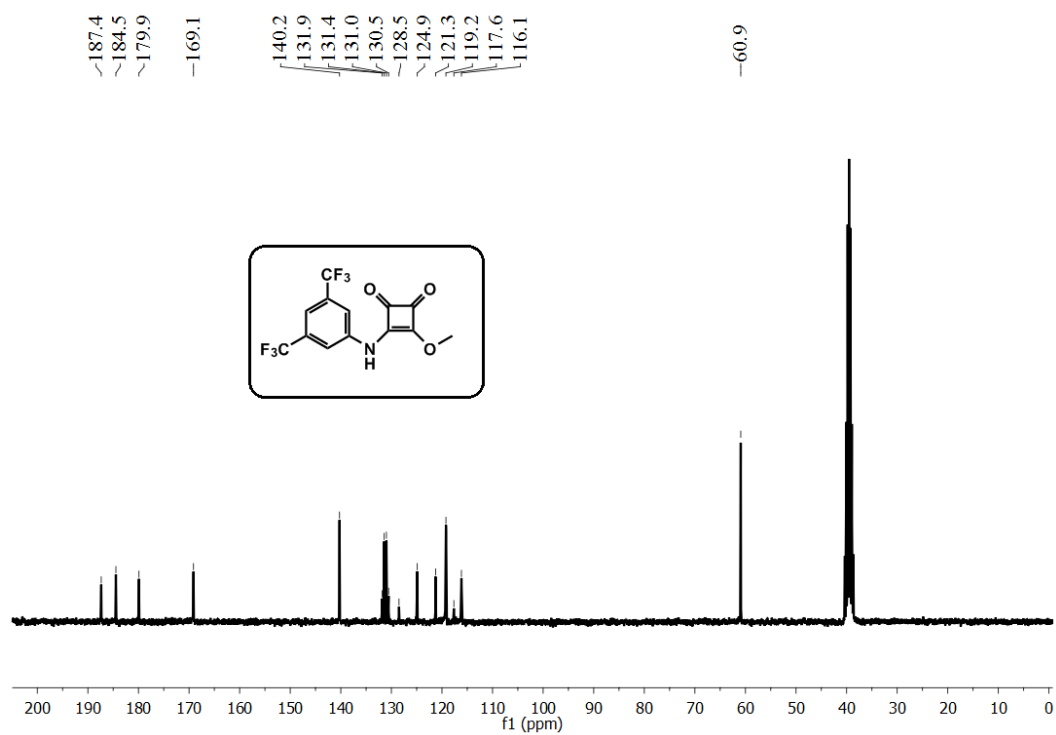



**Fig. S87:**  $^1\text{H}$  NMR spectrum of **S2** in  $\text{CDCl}_3$ .

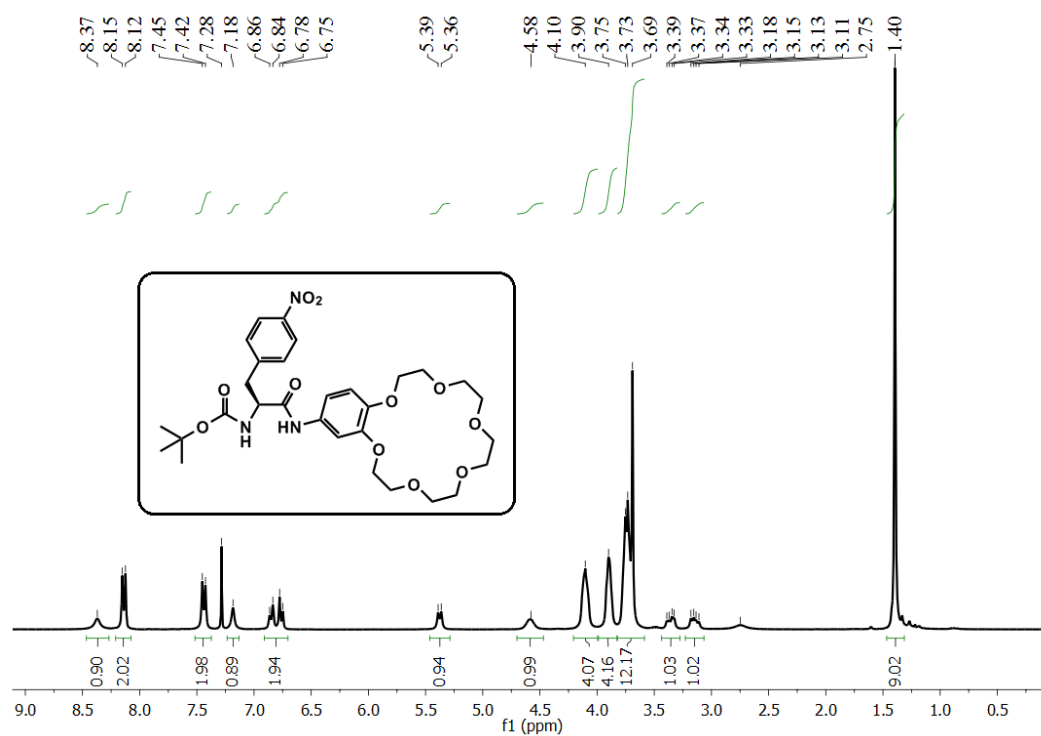

**Fig. S88:**  $^{13}\text{C}$  NMR spectrum of **S2** in  $\text{CDCl}_3$ .

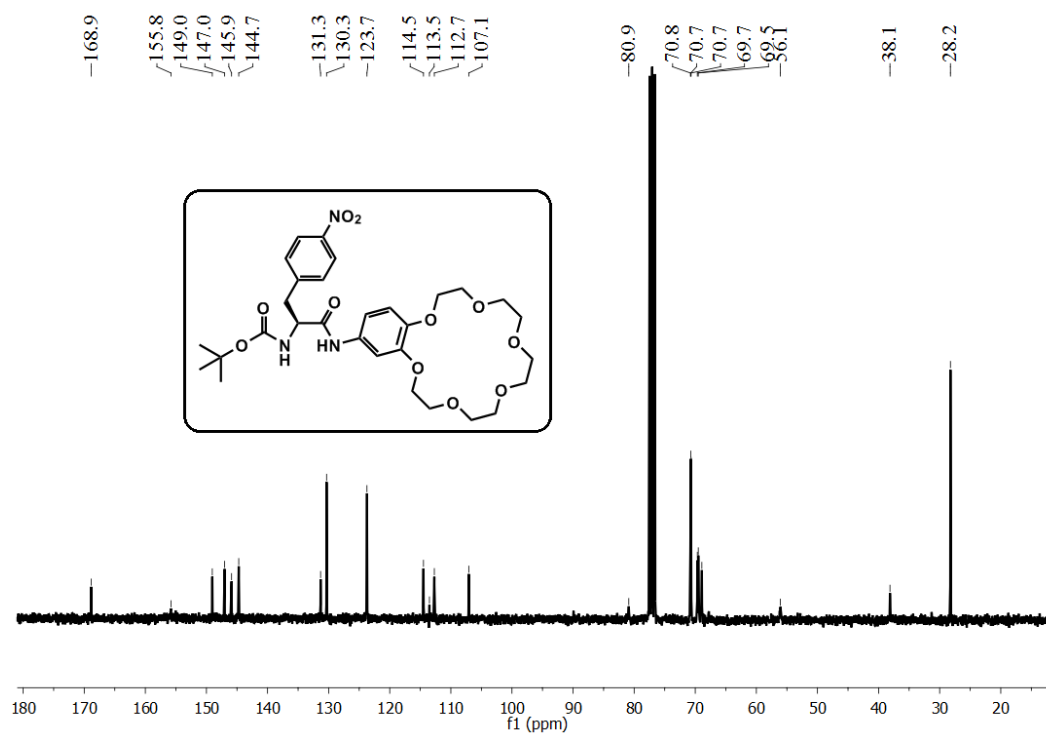

**Fig. S89:**  $^1\text{H}$  NMR spectrum of **2** in  $\text{DMSO-}d_6$ .

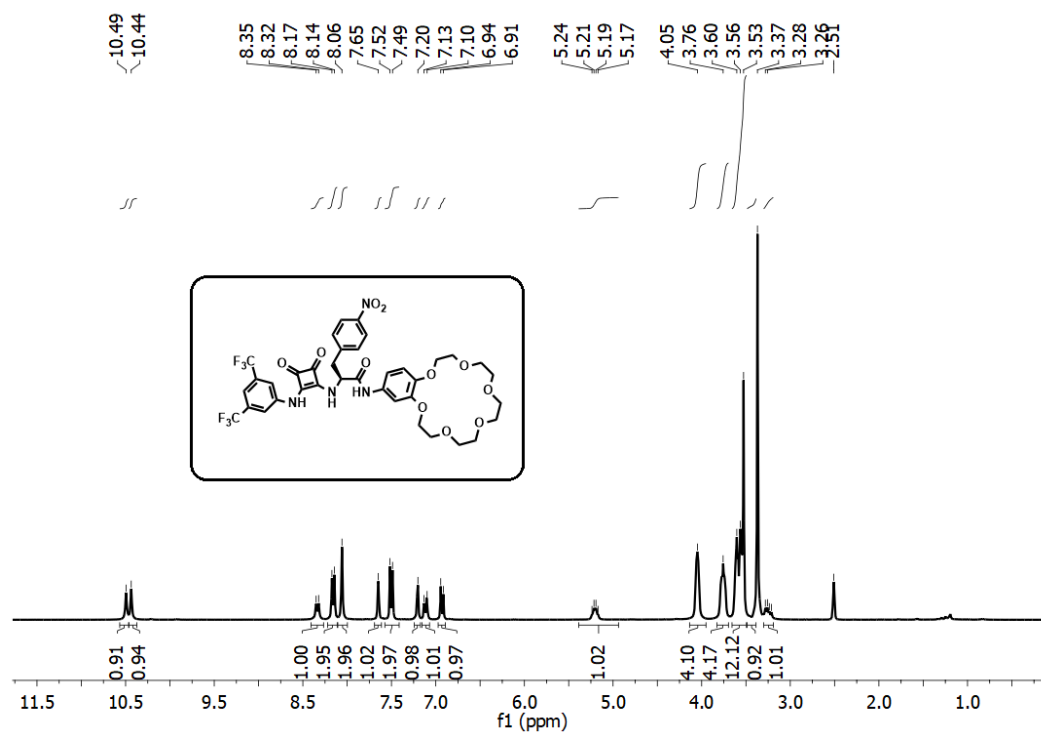

**Fig. S90:**  $^{13}\text{C}$  NMR spectrum of **2** in  $\text{DMSO-}d_6$ .

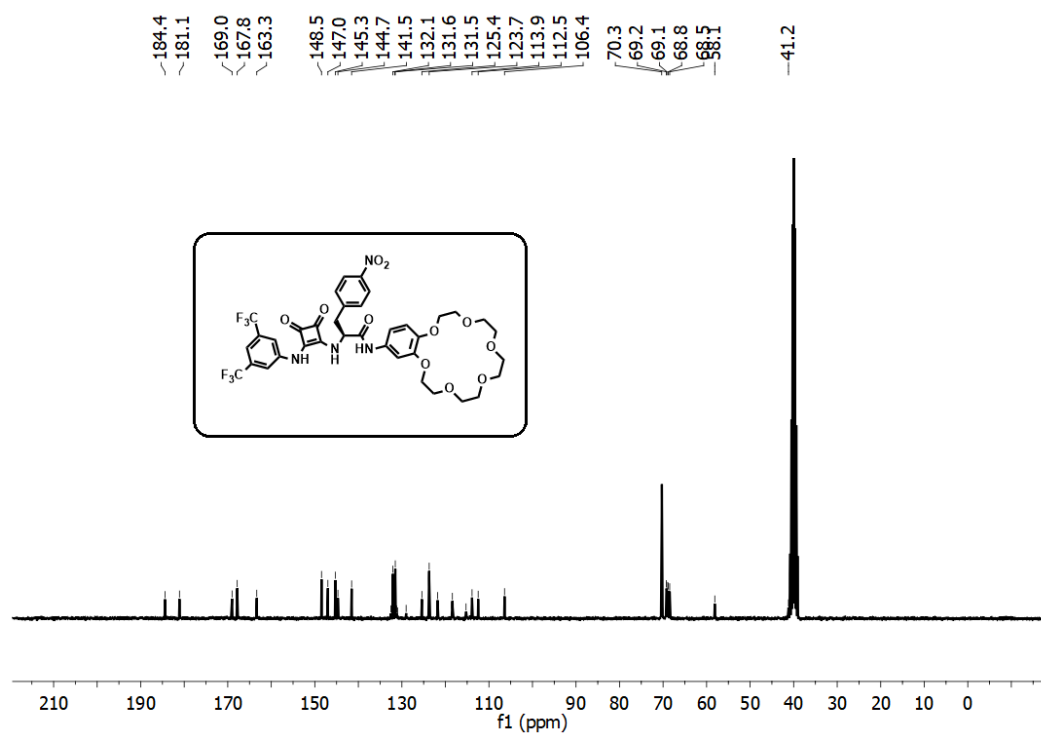

**Fig. S91:**  $^1\text{H}$  NMR spectrum of **S3** in  $\text{DMSO}-d_6$ .

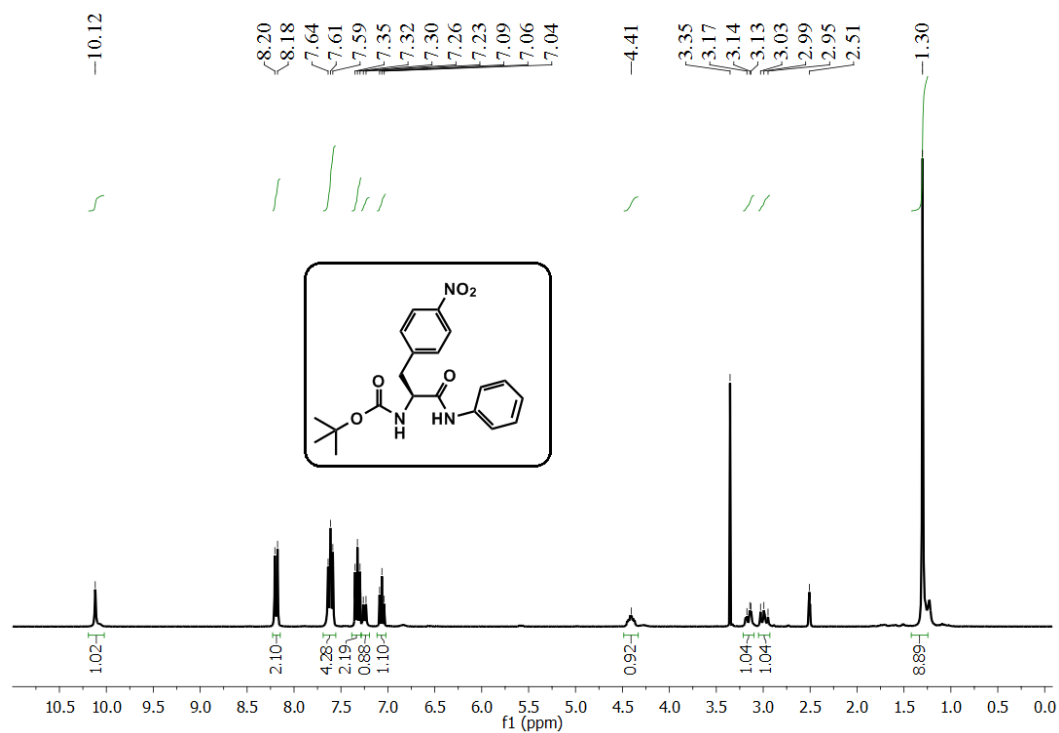

**Fig. S92:**  $^{13}\text{C}$  NMR spectrum of **S3** in  $\text{DMSO}-d_6$ .

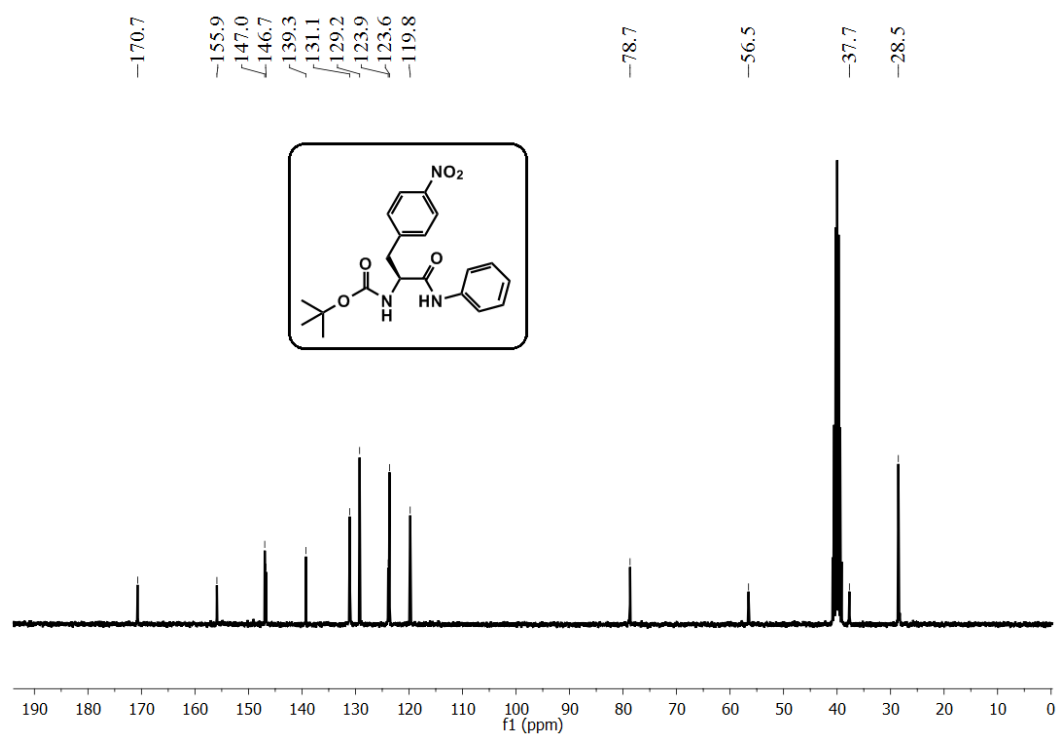

**Fig. S93:**  $^1\text{H}$  NMR spectrum of **3** in  $\text{DMSO-}d_6$ .

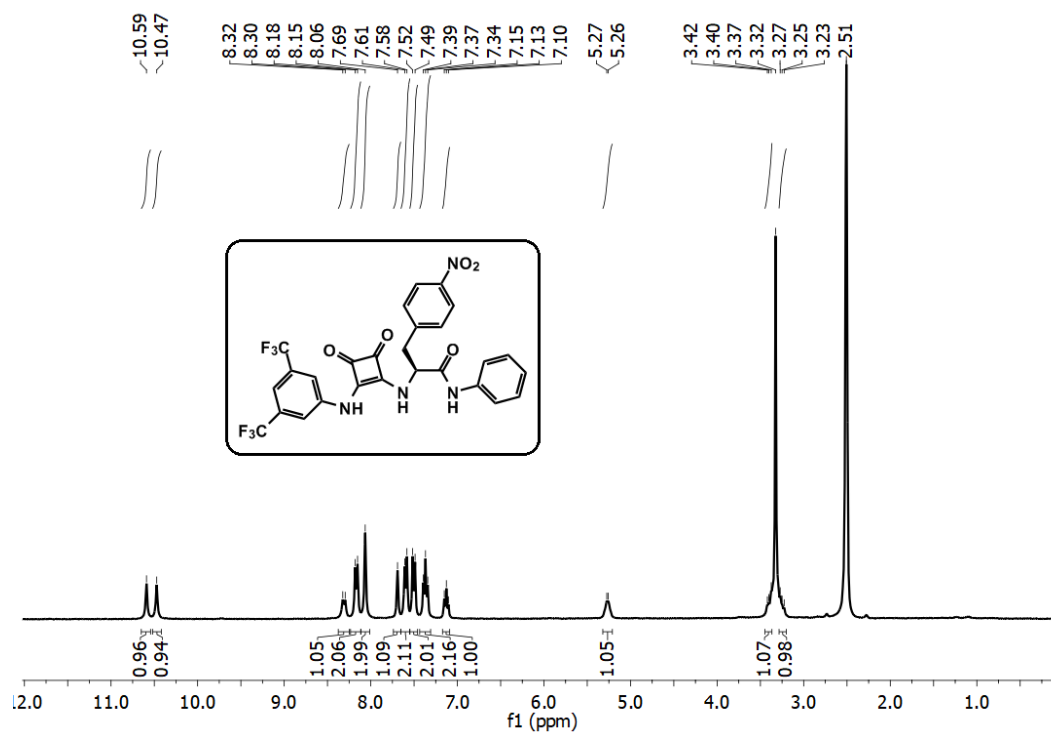

**Fig. S94:**  $^{13}\text{C}$  NMR spectrum of **3** in  $\text{DMSO-}d_6$ .

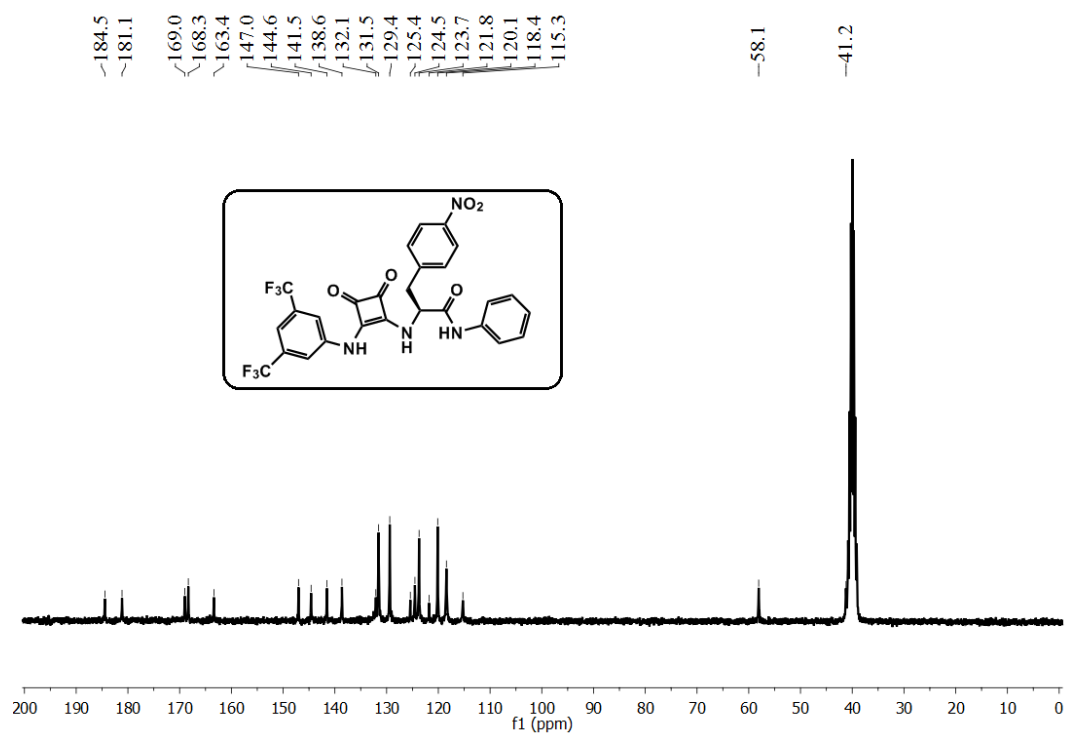

**Fig. S96:**  $^{13}\text{C}$  NMR spectrum of **4** in DMSO- $d_6$ .

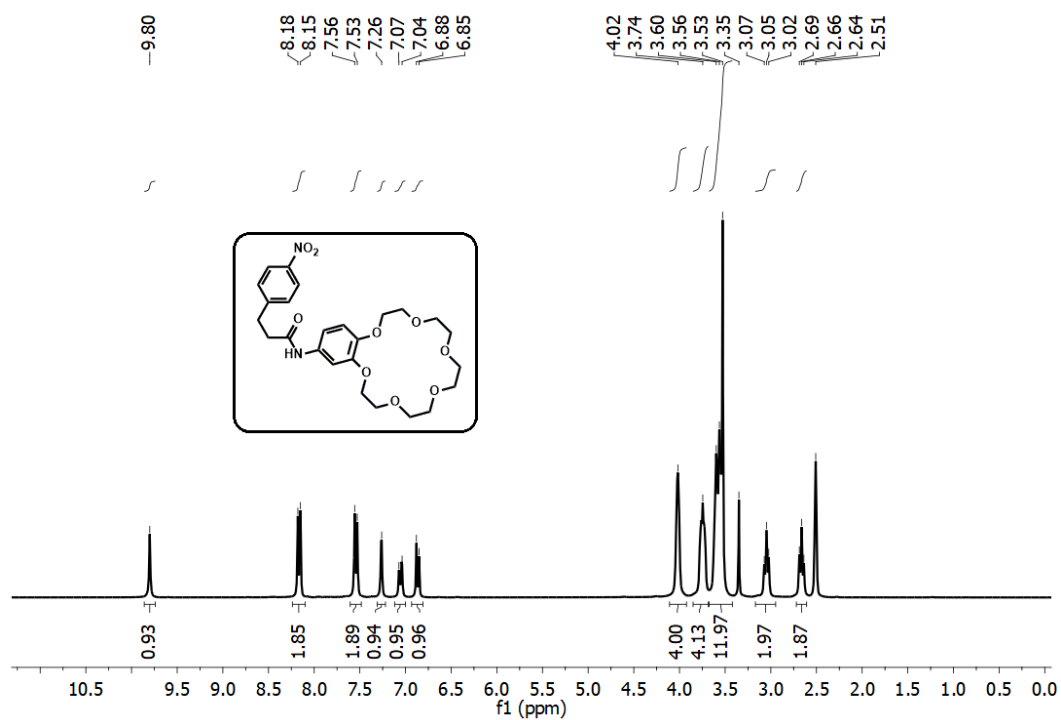

**Fig. S96:**  $^{13}\text{C}$  NMR spectrum of **4** in DMSO- $d_6$ .

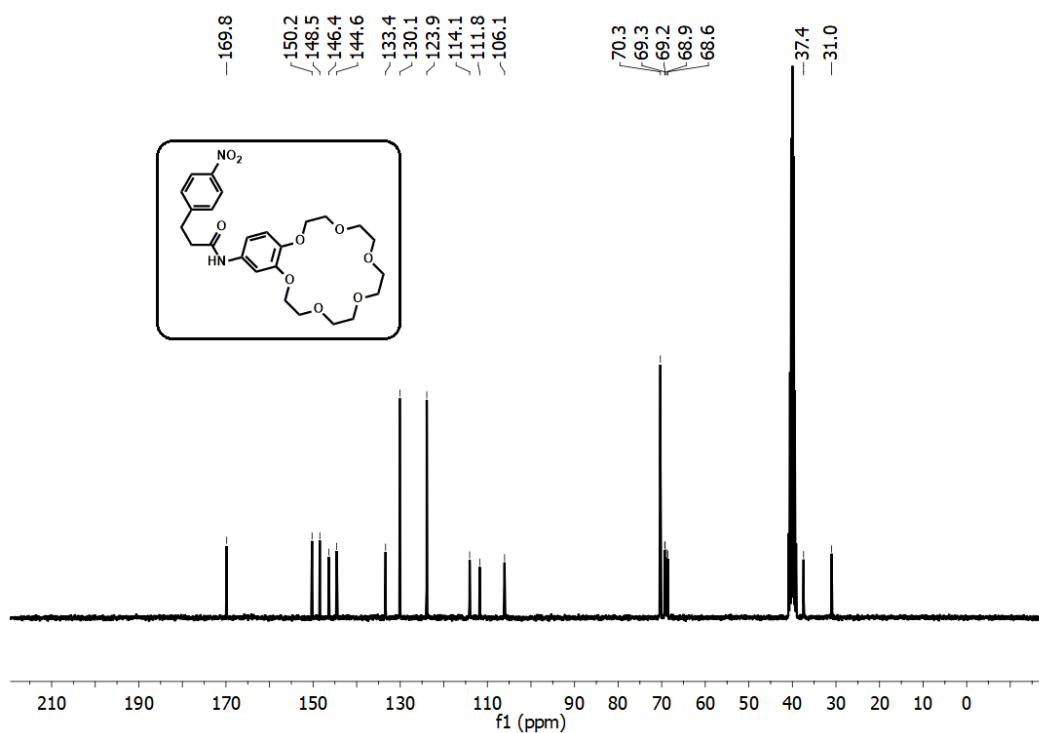

Supplement: s1 [file s1]
